# Supplementary material for: Does weight-related stigmatisation and discrimination depend on educational attainment and level of income? A systematic review
Source: PubMed Central journal article supplement — BMJ Open. 2019 Nov 18;9(11):e027673. doi: 10.1136/bmjopen-2018-027673 (PMC6886928; doi:10.1136/bmjopen-2018-027673), 2019-11-18
Supplement: bmjopen-2018-027673.draft_revisions.pdf [file bmjopen-2018-027673.draft_revisions.pdf]

# BMJ Open

BMJ Open is committed to open peer review. As part of this commitment we make the peer review history of every article we publish publicly available.

When an article is published we post the peer reviewers' comments and the authors' responses online. We also post the versions of the paper that were used during peer review. These are the versions that the peer review comments apply to.

The versions of the paper that follow are the versions that were submitted during the peer review process. They are not the versions of record or the final published versions. They should not be cited or distributed as the published version of this manuscript.

BMJ Open is an open access journal and the full, final, typeset and author-corrected version of record of the manuscript is available on our site with no access controls, subscription charges or pay-per-view fees (<http://bmjopen.bmj.com>).

If you have any questions on BMJ Open's open peer review process please email [info.bmjopen@bmj.com](mailto:info.bmjopen@bmj.com)

# BMJ Open

## Does weight bias depend on educational attainment and level of income? A systematic review

|                               |                                                                                                                                                                                                                                                                                                                                                                                                                                                                                            |
|-------------------------------|--------------------------------------------------------------------------------------------------------------------------------------------------------------------------------------------------------------------------------------------------------------------------------------------------------------------------------------------------------------------------------------------------------------------------------------------------------------------------------------------|
| Journal:                      | <i>BMJ Open</i>                                                                                                                                                                                                                                                                                                                                                                                                                                                                            |
| Manuscript ID                 | bmjopen-2018-027673                                                                                                                                                                                                                                                                                                                                                                                                                                                                        |
| Article Type:                 | Research                                                                                                                                                                                                                                                                                                                                                                                                                                                                                   |
| Date Submitted by the Author: | 12-Nov-2018                                                                                                                                                                                                                                                                                                                                                                                                                                                                                |
| Complete List of Authors:     | Bernard, Marie; Leipzig University Medical Center , IFB Adiposity Diseases; SRH University of Applied Health Sciences, Fankhänel, Thomas; SRH University of Applied Health Sciences, Riedel-Heller, Steffi; University of Leipzig, Institute of Social Medicine, Occupational Health and Public Health (ISAP), Medical Faculty Luck-Sikorski, Claudia; SRH University of Applied Health Sciences; University of Leipzig, Integrated Research and Treatment Center (IFB) Adiposity Diseases |
| Keywords:                     | obesity, stigma, discrimination, education, income                                                                                                                                                                                                                                                                                                                                                                                                                                         |
|                               |                                                                                                                                                                                                                                                                                                                                                                                                                                                                                            |

SCHOLARONE™  
Manuscripts

# Does weight bias depend on educational attainment and level of income?

## A systematic review

---

**Bernard, Marie** <sup>a, b, \*</sup>, **Fankhänel, Thomas** <sup>b</sup>, **Riedel-Heller, Steffi G.** <sup>c</sup>, **Luck-Sikorski, Claudia** <sup>a, b</sup>

<sup>a</sup> Leipzig University Medical Center, IFB Adiposity Diseases, Philipp-Rosenthal-Straße 27, 04103 Leipzig, Germany

<sup>b</sup> SRH University of Applied Health Sciences, Neue Straße 28-30, 07548 Gera, Germany

<sup>c</sup> Institute of Social Medicine, Occupational Health and Public Health (ISAP), University of Leipzig, Philipp-Rosenthal-Straße 55, 04103 Leipzig, Germany

\* Corresponding author

Marie Bernard

Leipzig University Medical Center

IFB Adiposity Diseases

Philipp-Rosenthal-Straße 27

04103 Leipzig, Germany

Tel.: 0049365-773407-42

E-Mail: [marie.bernard@medizin.uni-leipzig.de](mailto:marie.bernard@medizin.uni-leipzig.de)

Word count 3,792

## Abstract

**Objectives:** Obesity is considered a worldwide health issue, not only because of its health-related consequences, but also because of its impact on social status as a result of stigma. The aim of this study is to review the quantitative state of research regarding to socioeconomic characteristics' impact on weight-related attitudes. Based on Bourdieu's Theory of Class and his concept of "habitus", it is assumed that people with a higher level of education and income show greater and more negative attitudes toward people with obesity.

**Method:** A systematic literature review was conducted in 2017 using PubMed, PsychINFO, Web of Science, and the Cochrane Library. Fifteen studies that measured weight bias and either educational attainment or level of income were included in the analysis.

**Results:** The results of the studies included were inconsistent: six of these studies were found to support the hypothesis, whereas two of the studies contradicted it. The remaining seven studies did not show any significant correlation between weight bias and either education or income.

**Conclusion:** In light of these inconclusive and overall heterogeneous results, we cannot determine a reliable correlation between level of education or income with weight bias. Controversial findings might be caused by cultural and governmental differences. Furthermore, educational attainment seems to be more likely to predict weight bias than income. The review revealed a lack of research when it came to examining the impact of socioeconomic capital on weight bias.

**Keywords:** obesity, stigma, discrimination, education, income

### Strength and limitations of this study

- Systematic review of the correlation between weight bias and socioeconomic status
- Considering macro level structures as moderating determinants of weight bias
- Attempt to explain heterogeneous and inconclusive results by appealing to governmental and cultural differences

## Introduction

According to the World Health Organization (WHO), the worldwide prevalence of obesity, defined by a body mass index (BMI) of over 30 kg/m<sup>2</sup>, nearly tripled between 1975 and 2016 [1]. To give but two examples, current data reveal an obesity rate of over 21% in Germany and 37.7% in the US [2, 3]. In regard to its escalating rate, obesity can be classified as a worldwide health issue, especially because it is associated with numerous comorbid diseases, such as diabetes mellitus, cardiovascular diseases, and certain forms of cancer [4].

Not only health-related consequences are connected to obesity, but also psychological implications that affect those concerned on a social level [5]. In particular, obesity is classified as a stigmatized condition. Therefore, being obese is a characteristic that sets those affected apart from people with normal weight. Since obesity is mislabeled as a self-inflicted situation, numerous negative stereotypes, such as laziness, lack of willpower, unhealthy lifestyle, and being unintelligent are associated with the condition [6]. Stigmatization leads to discriminating behavior toward people with obesity in the form of mistreatment in several areas of life, such as labor market, healthcare, and educational system [6, 7].

The systematic review of Spahlholz [8] revealed an increased perceived discrimination toward people with obesity in comparison to people with normal weight, especially toward people with more extreme obesity (BMI >35 kg/m<sup>2</sup>) as well as toward women. Moreover, the prevalence of weight-related discrimination accelerated over time. In the US, the prevalence of weight-related discrimination was nine times higher (66%) in 2005 than in 1995 (7.3%) [7, 8] and is thus similar to the rate of racial discrimination, particularly against women [9]. To prevent discriminating behavior, it is necessary to understand the origin of stigma, which can be seen as the catalyst of structural discrimination.

Determinants of stigmatizing attitudes and weight bias can be found, for example, in sociodemographic variables. There is some evidence that older age is associated with greater stigmatizing attitudes [10–12] and stronger evidence that men show greater weight bias than women [13–16]. When looking at the body and beauty

1  
2  
3 perception of people, the cultural framework also needs to be considered as a  
4 determinant of stigma. According to Bourdieu, the predominant cultural framework  
5 determines which values and characteristics can be seen either as desirable or traits  
6 to be stigmatized [17]. Depending on regional characteristics, weight is perceived as  
7 a sign of class distinction. In undeveloped countries, overweight was associated  
8 positively with well-being and wealth, while in developed countries a negative view of  
9 being overweight was widespread. Thus, in developed countries thinness has been  
10 viewed as a sign of beauty, success, and an overall high (socioeconomic) status [18].  
11 Although, in the last decades the perception of obesity or rather slim-body ideals in  
12 developing countries might have changed [19, 20], results indicate that educational  
13 attainment and level of income seem to be relevant in regard to divergent weight  
14 bias.

15  
16  
17 Although, socioeconomic variables and obesity correlate closely, the impact of  
18 educational attainment and level of income on weight bias remain ambiguous.  
19 Several studies have shown the negative impact of being overweight on the labor  
20 market, especially for women [21, 22] as well as in the education system [23]. In  
21 addition, a lower level of education and income is associated with obesogenic  
22 behavior such as a poor diet and a lack of exercise caused by factors such as stress  
23 [24]. Moreover, Bourdieu [25] sees in socioeconomic class the most decisive  
24 determinant of healthy lifestyle. While people that belong to the working class  
25 preferred tasty and nutritious food, people from the upper-middle class preferred  
26 tasty food that can be described as light, healthy, and low in calories, according to his  
27 study. Subsequently, people with a higher level of education and income might  
28 choose a healthier lifestyle in order to distance themselves from people with obesity  
29 [26].

30  
31  
32 As a superior framework to generate missing hypotheses, Bourdieu's Theory of  
33 Class can be applied [25]. In accordance with his concept of "habitus", a person's  
34 general attitude, lifestyle, and even body shape can be seen as a metaphor for social  
35 status [18]. Furthermore, Bourdieu considers stigma as a form of symbolic power and  
36 a tool to serve the interests of the powerful [27]. Phelan and colleagues [28] continue  
37 with his line thought and presented three motives of stigma, namely *keeping people*

1  
2  
3 *in, away, or down.* Particularly, *keeping people down* applies to the review's  
4 theoretical framework. Link and Phelan [17] discuss stigma as an instrument of a  
5 dominant group to keep another group down in order to attain or rather maintain a  
6 high social status, wealth, and power. However, a person's educational attainment  
7 and level of income are mainly invisible characteristics; thus, there are other  
8 attributes that more readily show social status. Assuming that obesity is perceived as  
9 a metaphor for lower social status, groups with higher social status might be aware of  
10 this link and keep people with obesity down in order to empower themselves. In this  
11 review, it is therefore assumed that people with a higher level of education and  
12 income display negative attitudes toward people with obesity in comparison to people  
13 with lower educational attainment and income. The impact of educational attainment  
14 and level of income on weight bias will be examined and compared.

25 Based on a sociological perspective, this systematic literature review attempts to  
26 outline the current state of research and reveal the relationship between weight bias  
27 and educational attainment and/or level of income. Such as Tyler and Slater [29]  
28 criticized inter alia "*that one of the major limitations of existing understandings of*  
29 *stigma is the ways in which they have 'bracketed off' key questions, such as where*  
30 *stigmatizing attitudes come from, how and by whom is stigma crafted, mediated,*  
31 *produced and why [...].*", the general aim of this review is to identify social and  
32 economic groups that stigmatize and discriminate against those who are obese. In  
33 the future, this information could help researchers to develop and implement  
34 interventions in a more targeted manner.

## 43 **Methods**

### 44 Search Strategy

45 A systematic review of published studies reporting anti-fat attitudes held by differing  
46 socioeconomic status groups was conducted by using the relevant scientific  
47 electronic databases: PubMed, PsychINFO, Web of Science, and the Cochrane  
48 Library. The review followed the Prisma Guidelines [30].

49 The systematic review of literature was performed independently by two reviewers  
50 from November 2016 until January 2017 using the following key words: stigma\*,  
51  
52  
53  
54  
55  
56  
57  
58  
59  
60

1  
2  
3 discrimination, "weight bias", or prejudice; education\*, income, salary, wage, status,  
4 socio-economic, socioeconomic\*, SES, sociodemographic, or socio demographics;  
5 and obes\*, overweight, or fat. Giving of the very high number of results, the search  
6 was limited to the publications' titles and abstracts. Only work published in English or  
7 German was included. There was no restriction in regard to the year of publication.  
8  
9

### 10 11 12 Data extraction

13  
14 The systematic search of literature revealed 1,788 studies, whereby 1,234 studies  
15 remained after removing duplicates. Furthermore, 1,100 studies were excluded  
16 because screening their titles and abstracts for eligibility revealed no association to  
17 the research question that will be examined in this review. Disagreement and  
18 uncertainty between the two reviewers over the eligibility of certain abstracts were  
19 resolved by reinspecting the papers in detail and discussing disparate perspectives.  
20 For the remaining 134 studies, full papers were screened in detail to assess their  
21 eligibility by applying the following inclusion and exclusion criteria. The stages of the  
22 systematic literature search are provided in Figure 1.  
23  
24  
25  
26  
27  
28  
29

### 30 31 Inclusion criteria

32  
33 Studies were only included if they investigated weight bias in form of stigmatizing  
34 attitudes, discrimination (e.g., measured, for example, by policy and law support), or  
35 beliefs about causes of obesity. These causes included a lack of willpower as a proxy  
36 measure for stigmatizing attitudes. Furthermore, studies included had to report some  
37 kind of association between weight bias and either educational attainment or level of  
38 income.  
39  
40  
41  
42

### 43 44 Exclusion criteria

45  
46 The following exclusion criteria were used to eliminate studies that were not  
47 applicable: (a) studies with a sample of health care professionals, dietitians,  
48 psychologists, and physical educators; (b) studies that investigated stigmatizing  
49 attitudes of children and/or adolescents; (c) studies that investigated stigma toward  
50 childhood obesity; (d) studies with an overweight and/or obese sample that  
51 investigated perceived stigmatization; (e) studies with a homogenous sample in  
52 regard to educational attainment (e.g., students) or level of income; (f) studies that  
53  
54  
55  
56  
57  
58  
59  
60



1  
2  
3 investigated weight bias toward extended stigma groups (e.g., obese and binge  
4 eating); and (g) reviews or qualitative studies.

5  
6 The stages of the systematic literature search are provided in Fig. 1. In summary, 41  
7 studies were excluded because they did not report the participants' educational  
8 attainment or income. In addition, 8 studies provided a lack of information with regard  
9 to the samples' socioeconomic variance and 21 studies were excluded because of  
10 the samples' characteristic (overweight/obese sample n=10; children/adolescents  
11 sample n=11). Two studies were excluded because they followed a qualitative  
12 approach, and 22 studies were excluded because they could be categorized as  
13 reviews. Twenty-one studies were found that did not meet the criteria for the aimed  
14 outcome of weight bias. Two studies were neither published in English nor in  
15 German. Moreover, one paper had to be excluded because of its lack of academic  
16 background.  
17  
18  
19  
20  
21  
22  
23  
24  
25  
26

27 After excluding the studies that did not meet our criteria, 15 studies were identified as  
28 relevant for in-depth investigation. Therefore, sampling characteristics, study design,  
29 assessment of weight bias, and measurement of educational attainment and income  
30 were systematically examined.  
31  
32  
33

### 34 Patient and Public Involvement

35 Within this study no data was assessed. We conducted a systematic review and  
36 analyzed therefore data that has already been collected. Thus, patients were not  
37 involved in this study.  
38  
39  
40  
41  
42

### 43 **Results**

44 The 15 studies included were tabulated according to the following characteristics:  
45 origin of the sample, sample size (N), sample characteristics, study design,  
46 instruments to assess weight bias, educational attainment or income, and a brief  
47 summary of results. Studies reviewed in detail are tabulated by either educational  
48 attainment (Table 1) or by level of income (Table ).  
49  
50  
51  
52  
53  
54  
55  
56  
57  
58  
59  
60

### Study characteristics

All relevant study characteristics are summarized in Table 1 and Table , respectively. Six out of fifteen studies are based entirely on an American sample [31–36, 36]. Two other studies are based on an American and an Icelandic adult sample [37, 38]. These two studies also provided data based on a Canadian sample of health care professionals and American, Australian, and Icelandic student samples that did not meet the inclusion criteria and therefore all four samples had to be excluded. Two studies were based on a German sample [10, 39], and five studies based on one sample, from Paraguay [40], Mexico [41], Sweden [42], Denmark [43], and Great Britain [44] respectively. The study by [40], based on a Paraguayan sample also provided data of a comparison group of US-undergraduate students that was not considered in the analysis because of the homogenous study sample in terms of educational attainment. The fifteen studies included showed a wide variation of sample sizes ranging from 146 [36] to 3,331 participants [32].

Since the aim of the study was to outline the impact that socioeconomic status in form of educational attainment and level of income have on weight bias, attention was paid to a variation in these variables within the samples. The studies included therefore focused either on a population-based sample [10, 33, 34, 39, 42] or an adult sample [31, 32, 36–38, 43]. Although Jiminez-Cruz and colleagues [41] investigated stigmatizing attitudes of an entirely low-income sample, but divided the socioeconomic factors (level of education and income) into five and four categories respectively; thus, variation within the sample could be ensured. Moreover, an investigation of weight bias in different gradations of lower status groups could provide further insight into the topic. In one study [35], the general population was included, whereby the overweight participants received an alternative questionnaire assessing the perceived stigmatization and not their stigmatizing attitudes toward obesity. Therefore, only the normal weight sample could be included.

The distribution of women and men was equally considered in the majority of studies, even though more women than men were included. However, two studies posed an

1  
2  
3 exception. The study of Brewis et al. [40] and the study of Jiminez-Cruz [41]  
4 investigated only the stigmatizing attitudes of female participants.  
5  
6  
7  
8  
9  
10  
11  
12  
13  
14  
15  
16  
17  
18  
19  
20  
21  
22  
23  
24  
25  
26  
27  
28  
29  
30  
31  
32  
33  
34  
35  
36  
37  
38  
39  
40  
41  
42  
43  
44  
45  
46  
47  
48  
49  
50  
51  
52  
53  
54  
55  
56  
57  
58  
59  
60

For peer review only

Table 1. Summary of Selected Studies: Weight Bias Depending on Educational Attainment

| Study             | N     | Sample description                                                           | Study Design                         | Instruments                                                                                   | Weight bias | Educational attainment                                                                                                | Association education/weight bias                                                                                                                                                                                                            | Direction of Correlation |
|-------------------|-------|------------------------------------------------------------------------------|--------------------------------------|-----------------------------------------------------------------------------------------------|-------------|-----------------------------------------------------------------------------------------------------------------------|----------------------------------------------------------------------------------------------------------------------------------------------------------------------------------------------------------------------------------------------|--------------------------|
| [35]; USA         | 396   | General, not overweight population (ø age: 42.7 years; 43.7% female)         | Experimental online survey           | Short-FPS[45]                                                                                 |             | Educational attainment                                                                                                | FPS: No                                                                                                                                                                                                                                      | –                        |
| [31]; USA         | 1,118 | US adult sample (ø age: 43.8 years; 50.2% female)                            | Online survey                        | Opinions about obesity as a disease [31]                                                      |             | Educational attainment (High School or less, Some college/Technical or vocation degree, college graduate or higher)   | No                                                                                                                                                                                                                                           | –                        |
| [37]; USA and ISL | 899   | US adult sample (ø age: 40.9 years; 46.1% female)                            | Online survey                        | Short-FPS [45]; UMB-FAT [46]                                                                  |             | Educational attainment (High school or less; some college/technical or vocation degree; College graduate or higher)   | FPS: inconsistent findings; greater fat phobia in some college vs. reference category (high school or less) (p<0.05)<br>UMB-Fat: inconsistent findings; greater stigma in some college vs. reference category (high school or less) (p<0.05) | –                        |
|                   | 659   | ISL adult sample (ø age: 45.9 years; 55.1% female)                           |                                      |                                                                                               |             |                                                                                                                       | FPS: No<br>UMB-Fat: Yes; Higher education leads to higher stigmatizing attitudes (p<0.05)                                                                                                                                                    | Positive                 |
| [34]; USA         | 981   | US representative sample (62% female)                                        | CATI                                 | Beliefs about obesity as a burden for society<br>Beliefs about the controllability of obesity |             | Educational attainment (less than some high school; High-school graduate; some college; higher than a college degree) | Beliefs about obesity as a burden for society: Yes; Higher educational attainment leads to higher agreement on stigmatizing statement<br>Beliefs about the controllability: No                                                               | Positive<br>–            |
| [39]; GER         | 3003  | population based (ø age: 51.7 years; 52.8% female)                           | CATI with vignette-based approach    | Short-FPS[45]                                                                                 |             | Educational attainment (no degree, 9th grade degree; 10th grade degree, 12th grade degree)                            | Yes; Higher educational attainment leads to less stigmatizing attitudes                                                                                                                                                                      | Negative                 |
| [10]; GER         | 1,000 | Population based sample (ø age: 45.9 years; 56.9% female)                    | CATI                                 | WCB [47]; Support for obesity prevention                                                      |             | Educational attainment (low= <13 years of education high= ≥ 13 years of education)                                    | WCB: Yes; Higher educational attainment leads to less stigmatizing attitudes<br>Support for obesity prevention: No                                                                                                                           | Negative<br>–            |
| [40]; PRY         | 200   | Women (ø age: 38.9 years)                                                    | Questionnaires in personal interview | ATOP [48]; IAT [49]                                                                           |             | Educational Attainment (years of formal education)                                                                    | ATOP: No<br>IAT: No                                                                                                                                                                                                                          | –<br>–                   |
| [42]; SWE         | 2,436 | Representative Swedish population aged 25-64 (ø age: 47.8 years; 63% female) | Face-to-face interview               | ATOP [48]                                                                                     |             | Educational attainment (low; medium; high)                                                                            | ATOP: No                                                                                                                                                                                                                                     | –                        |

Table 1 (continued)

| Study             | N     | Sample description                                     | Study Design                          | Instruments                                                                                                                                                                                          | Weight bias | Educational attainment                                                                                               | Association education/ weight bias                                                                                                | Direction of Correlation |
|-------------------|-------|--------------------------------------------------------|---------------------------------------|------------------------------------------------------------------------------------------------------------------------------------------------------------------------------------------------------|-------------|----------------------------------------------------------------------------------------------------------------------|-----------------------------------------------------------------------------------------------------------------------------------|--------------------------|
| [44]; GB          | 198   | Community-based (ø age: 32.58 year; 50.5% female)      | Paper-pencil questionnaire            | PFRS [50]                                                                                                                                                                                            |             | Educational attainment                                                                                               | No                                                                                                                                | –                        |
| [41]; MEX         | 1,100 | Women aged 18-40 of low SES (ø age: 37.5 years)        | Questionnaires in personal interviews | Beliefs about the causes of obesity                                                                                                                                                                  |             | Educational attainment (none, some elementary, elementary, middle, high school)                                      | Yes; Higher education leads to higher agreement with stigmatizing statements (self-responsibility as cause for obesity) (P<0.001) | Positive                 |
| [32]; USA         | 3,331 | Adults (age 21-65; 61.9% female)                       | Online survey                         | Support for three weight-related antidiscrimination laws<br>1.Law: protections for people with disabilities<br>2.Law: civil rights statutes<br>3.Law: reducing weight-based workplace discrimination |             | Educational attainment (High school or less; some college/ technical or vocation degree; College graduate or higher) | Chi-square test: Yes; Higher education leads to less support for disability and civil rights for people with obesity              | Positive                 |
|                   |       |                                                        |                                       |                                                                                                                                                                                                      |             |                                                                                                                      | Logistic regression model: Yes; Higher education leads to less support for disability and civil rights for people with obesity    | Positive                 |
| [38]; USA and ISL | 893   | US adult sample (ø age:40.9 years; 46.1% female)       | Online survey                         | Support for policies/laws to prohibit weight discrimination (antidiscrimination laws specific to employment/ broader antidiscrimination laws and policies)                                           |             | Educational attainment (High school or less; some college/technical or vocation degree; College graduate or higher)  | No                                                                                                                                | –                        |
|                   | 658   | ISL adults sample (ø age:45.9 years; 55.1% female)     |                                       | Assessing support for measures to prohibit weight discrimination by evaluating 6 different laws                                                                                                      |             | Educational attainment (High school or less/ College)                                                                | Yes; Higher education leads to less agreement with Broad Policies/Laws                                                            | Positive                 |
| [33]; USA         | 1,001 | Population based sample (ø age:43.8 years; 51% female) | Online survey                         | Attitudes toward weight-loss surgery & medical treatment of obesity                                                                                                                                  |             | Educational attainment (High School; college degree; Postgraduate degree)                                            | Yes; Higher education leads to less agreement with antidiscrimination laws                                                        | Positive                 |
| [43]; DNK         | 1,003 | Citizens aged 18-65                                    | Online survey                         |                                                                                                                                                                                                      |             | Educational attainment                                                                                               | No                                                                                                                                | –                        |

Note: Positive = demonstrates greater anti-fat attitudes with increasing educational attainment; Negative = demonstrate greater anti-fat attitudes with decreasing educational attainment; N = sample size; FPS = Fat Phobia Scale; UMB = Universal Measure of Bias; WCB = Weight Control/Blame of the Anti-Fat Attitudes Test; ATOP = Attitudes to Obese People; IAT = Implicit Association Test; PFRS = Photographic Figure Rating Scale; SES = Socioeconomic status

Table 2. Summary of Selected Studies: Weight Bias Depending on Level of Income

| Study     | N     | Sample description                                                           | Study Design                                     | Instruments                                                                   | Weight bias | Level of income                                                                         | Association level of income/<br>weight bias                                                                                      | Direction of<br>Correlation |
|-----------|-------|------------------------------------------------------------------------------|--------------------------------------------------|-------------------------------------------------------------------------------|-------------|-----------------------------------------------------------------------------------------|----------------------------------------------------------------------------------------------------------------------------------|-----------------------------|
| [35]; USA | 396   | General, not overweight population (ø age: 42.7 years; 43.7% female)         | Experimental online survey                       | Short-FPS [45]                                                                |             | Annual household income                                                                 | FPS: No                                                                                                                          | –                           |
| [36]; USA | 272   | US adults (ø age:32.7 years; 64% female)                                     | Questionnaire study with vignette-based approach | UMB [46];<br>Belief in stereotypes;<br>Acceptability of weight stigmatization |             | Family income level (divided in seven categories including the category "I don't know") | UMB: No<br>Beliefs in stereotypes: No<br>Acceptability of weight stigmatization: No                                              | –                           |
|           | 146   | US adults (ø age:33.2 years; 63.6% female)                                   |                                                  |                                                                               |             |                                                                                         | UMB: No<br>Beliefs in stereotypes: No<br>Acceptability of weight stigmatization: No                                              | –                           |
| [31]; USA | 1,118 | US adult sample (ø age:43.8 years; 50.2% female)                             | Online survey                                    | Opinions about obesity as a disease [31]                                      |             | Household income (divided in five categories)                                           | No                                                                                                                               | –                           |
| [34]; USA | 981   | US representative sample (62% female)                                        | CATI                                             | Beliefs about obesity as a burden for society                                 |             | Income (divided in six categories)                                                      | Beliefs about obesity as a burden for society: Yes;<br>A higher income level leads to higher agreement on stigmatizing statement | Positive                    |
|           |       |                                                                              |                                                  | Beliefs about the controllability of obesity                                  |             |                                                                                         | Beliefs about the controllability: No                                                                                            | –                           |
| [39]; GER | 3003  | population based (ø age:51.7 years; 52.8% female)                            | CATI with vignette-based approach                | Short-FPS [45]                                                                |             | Income (divided in four categories)                                                     | No                                                                                                                               | –                           |
| [10]; GER | 1,000 | Population based sample (ø age: 45.9 years; 56.9% female)                    | CATI                                             | WCB [47];<br>Support for obesity prevention                                   |             | Household income (low=2.000€; high>=2.000€)                                             | WCB: No<br>Support for obesity prevention: Yes;<br>Higher income leads to higher financial support (P<0.01)                      | Negative                    |
| [41]; MEX | 1,100 | Women aged 18–40 of low SES (ø age: 37.5 years)                              | Questionnaires in personal interviews            | Beliefs about the causes of obesity                                           |             | Weekly income (divided in four categories)                                              | No                                                                                                                               | –                           |
| [42]; SWE | 2,436 | Representative Swedish population aged 25–64 (ø age: 47.8 years; 63% female) | Face-to-face interview                           | ATOP [48]                                                                     |             | Yearly income                                                                           | ATOP: No                                                                                                                         | –                           |

1  
2  
3  
4  
5  
6  
7  
8  
9  
10  
11  
12  
13  
14  
15  
16  
17  
18  
19  
20  
21  
22  
23  
24  
25  
26  
27  
28  
29  
30  
31  
32  
33  
34  
35  
36  
37  
38  
39  
40  
41  
42  
43  
44  
45  
46

Table 2 (continued)

| Study     | N     | Sample description                                      | Study Design  | Instruments                                                                                                                                                                                             | Weight bias | Level of income                               | Association level of income/ weight bias                                                                                                                     | Direction of Correlation |
|-----------|-------|---------------------------------------------------------|---------------|---------------------------------------------------------------------------------------------------------------------------------------------------------------------------------------------------------|-------------|-----------------------------------------------|--------------------------------------------------------------------------------------------------------------------------------------------------------------|--------------------------|
| [32]; USA | 3,331 | Adults (age 21-65; 61.9% female)                        | Online survey | Support for three weight-related antidiscrimination laws<br>1. Law: protections for people with disabilities<br>2. Law: civil rights statutes<br>3. Law: reducing weight-based workplace discrimination |             | Household income (divided in five categories) | Chi-square test: Yes; Higher income leads to less support for disability right and civil rights for people with obesity<br><br>Logistic regression model: No | Positive<br><br>-        |
| [33]; USA | 1,001 | Population based sample (ø age: 43.8 years; 51% female) | Online survey | Assessing support for measures to prohibit weight discrimination by evaluating 6 different laws                                                                                                         |             | Annual income (divided in five categories)    | Yes; Higher income leads to less agreement with antidiscrimination laws                                                                                      | Positive                 |
| [43]; DNK | 1,003 | Citizens (age 18-65)                                    | Online survey | Attitudes toward weight-loss surgery & medical treatment of obesity                                                                                                                                     |             | Income                                        | No                                                                                                                                                           | -                        |

Note: Positive = demonstrates greater weight bias with increasing level of income; Negative = demonstrate greater weight bias with decreasing level of income; N = sample size

## Instruments

### Educational attainment and level of income

Fifteen studies were found that assessed attitudes toward obesity in association with participants' educational attainment and/or level of income. Out of fifteen studies, fourteen reported the participants' educational attainment [10, 31–35, 37–44]. Depending on the origin of the sample and the analogous countries' educational system, categories were formed or years of educational attainment were gathered.

From fifteen studies, eleven assessed participants' level of income [10, 31–36, 39, 41–43]; therefore, income was either assessed by the annual, weekly, household, or individual income.

### Weight Bias

The studies included were divided with regard to the dependent variable (weight bias) into two groups. The first group consists of studies that investigated participants' discriminatory attitudes toward people with obesity [32, 33, 38, 43, 44] the second group included studies that examined either participants' stigmatizing attitudes or participants' beliefs about the causes of obesity [10, 31, 34–37, 39–42, 42, 44]. As described before, beliefs about the causes of obesity in form of evaluating obesity as a controllable condition – which is supposedly preventable by a higher extent of self-discipline – can consequently be seen as one decisive factor in determining stigmatizing attitudes [51]. The instruments used in both groups are presented in Figure 2.

### Findings

The studies included showed a very heterogeneous picture regarding their results. Eight out of the fifteen studies significantly associated educational attainment with stigmatizing and/or discriminatory attitudes toward people with obesity [10, 32–34, 37–39, 41]. These studies are presented in Table 3.

### Associations between educational attainment and weight bias

Six of the overall fifteen studies showed a positive association between higher educational attainment and each of the following three factors: greater stigmatizing attitudes, higher perceptions of personal responsibility, and lower support for antidiscrimination measures [32–34, 37, 38, 41]. However, two German studies [10,



1  
2  
3 39] showed an inverse correlation. Both of these studies found evidence that higher  
4 education is associated with lower stigma [39] and less belief in individual  
5 responsibility [10] for an obese condition.  
6  
7

#### 8 9 Associations between level of income and weight bias

10 Three out of 15 studies showed a significant association between income and weight  
11 bias [10, 32–34, 38, 39, 41]. Two American studies [10, 32–34, 38, 39, 41] revealed  
12 higher weight bias with increasing income, whereas one German study [10] found an  
13 inverted association.  
14  
15

16  
17  
18 Two additional studies [37, 38], using the same instruments and the same US and  
19 Iceland sample, found no significant association between weight bias and  
20 educational attainment in the US sample, but did find an association in the Icelandic  
21 sample. The statistical analysis of these two studies revealed significant correlation  
22 between educational attainment and discriminating ( $p<0.01$ ) and stigmatizing  
23 ( $p<0.05$ ) attitudes, respectively, in the Icelandic sample [37, 38].  
24  
25  
26  
27  
28  
29  
30  
31  
32  
33  
34  
35  
36  
37  
38  
39  
40  
41  
42  
43  
44  
45  
46  
47  
48  
49  
50  
51  
52  
53  
54  
55  
56  
57  
58  
59  
60

**Table 3. Studies That Show Significant Associations Between Weight Bias and Educational Attainment or Level of Income**

| Study | Direction of correlation | Instrument Weight Bias                    | SES indicator | Result                                                                                                                                          | Adjusted for                                                                                                 |
|-------|--------------------------|-------------------------------------------|---------------|-------------------------------------------------------------------------------------------------------------------------------------------------|--------------------------------------------------------------------------------------------------------------|
| [39]  | Negative                 | Short-FPS                                 | Education     | Higher educational attainment leads to lower stigmatizing attitudes                                                                             | Gender, age, income, residence, emigrational background                                                      |
| [10]  | Negative                 | WCB                                       | Education     | Higher educational attainment leads to less stigmatizing attitudes (P<0.001)                                                                    | Causal attributions to behavior, Labeling obesity as an illness, Age, Causal attributions to heredity        |
| [37]  | Positive                 | UMB-Fat                                   | Education     | Higher educational attainment leads to higher stigmatizing attitudes (ISL sample; P<0.05)                                                       | Gender, race/ethnicity, BMI, perceived causes of obesity, weight-related attributions                        |
| [41]  | Positive                 | Beliefs about the causes of obesity       | Education     | Higher educational attainment leads to greater belief in individual responsibility (P<0.001)                                                    | Unadjusted                                                                                                   |
| [34]  | Positive                 | Belief in obesity as a burden for society | Education     | Higher educational attainment leads to greater belief in statement "Obesity is a major burden to society in terms of healthcare costs" (P<0.01) | Race/ethnicity, sex, income, employment, age group, marital status, BMI, smoking status                      |
| [32]  | Positive                 | Support for weight-related laws           | Education     | Higher educational attainment leads to lower support for weight-related laws (P<0.01)                                                           | Other socio-demographic variables                                                                            |
| [38]  | Positive                 | Support for weight-related laws           | Education     | Higher educational attainment leads to less support for weight-related laws (P<0.01)                                                            | Sex, age, race/ethnicity, BMI                                                                                |
| [33]  | Positive                 | Support for weight-related laws           | Education     | Higher educational attainment leads to lower support for weight-related laws                                                                    | Sex, body weight, age, education, income, race, political affiliation, history of weight-based victimization |
| [10]  | Negative                 | Financial support of obesity prevention   | Income        | Lower income leads to lower financial support (P<0.01)                                                                                          | Unadjusted                                                                                                   |
| [34]  | Positive                 | Belief in obesity as a burden for society | Income        | Yes; A higher income level leads to greater belief in statement "Obesity is a major burden to society in terms of healthcare costs" (P<0.05)    | Race/ethnicity, sex, education, employment, age group, marital status, BMI, smoking status                   |
| [33]  | Positive                 | Support for weight-related laws           | Income        | Higher income leads to lower support for weight-related laws                                                                                    | Sex, body weight, age, education, income, race, political affiliation, history of weight-based victimization |

1  
2  
3  
4  
5  
6  
7  
8  
9  
10  
11  
12  
13  
14  
15  
16  
17  
18  
19  
20  
21  
22  
23  
24  
25  
26  
27  
28  
29  
30  
31  
32  
33  
34  
35  
36  
37  
38  
39  
40  
41  
42  
43  
44  
45  
46  
47  
48  
49  
50  
51  
52  
53  
54  
55  
56  
57  
58  
59  
60

For peer review only

## Discussion

The systematic literature review conducted reveals heterogeneous results based on factors such as country of origin, study type, and instruments used. Overall, eight out of the fifteen studies showed that weight bias is significantly associated with either educational attainment or level of income. Of these eight studies, six, based on American [32–34, 38, 41], Icelandic [37, 38], or Mexican [41] samples, indicate support for the working hypothesis that weight bias is in fact greater with increasing educational attainment or level of income. In contrast, two German studies [10, 39] found the reverse association, i.e. diminished weight bias with increasing educational attainment or level of income. However, the remaining seven studies did not show any significant association between weight bias and socioeconomic determinants. The heterogeneous and inconclusive results might be caused by diverging study designs, sample sizes, and instruments assessing weight bias, educational attainment, and level of income. In light of these inconclusive and overall heterogeneous results, a reliable correlation between level of education or income with weight bias cannot be determined.

Studies that did not show a significant association between weight bias and either educational attainment or level of income excluded the overweight portion of the sample [35] or were characterized by a small sample (ranging from n=146 to n=396) size [35, 36, 40, 44]. Furthermore, the association between weight bias with either educational attainment or level of income were not seen in instruments such as the Attitudes to Obese People scale (ATOP) [40, 42], the Implicit Association Test (IAT) [40] agreement ratings as to whether obesity can be classified as a disease [31], and measurement of attitudes toward weight-loss surgery and medical treatment [43].

However, it remains unclear why in the eight studies that indicate significant associations, the correlations between weight bias and socioeconomic variables found seem to be inconsistent. American, Mexican, and Icelandic studies were found to support the working hypothesis, whereas two German studies revealed findings to the contrary. These contradicting findings might be ascribed at a macro level to

1  
2  
3 Bourdieu's theory about how cultural frameworks determine how certain values and  
4 characteristics are perceived. It can be assumed that cultural frameworks shape  
5 governmental systems and are strengthened at the same time through them,  
6 especially through the national health and welfare systems. Tyler and Slater [29], for  
7 example, outline the political and social function of stigma as a form of power. They  
8 discuss macro level structures, particularly those used actively and passively by  
9 governments, as determinants shaping stigmatizing attitudes, a level of  
10 understanding often left out in social psychology. Hence, stigma is not only an  
11 instrument used by individuals to enforce personal interests but also one put in place  
12 (intended or not) by governments.  
13  
14  
15  
16  
17  
18  
19

20  
21 Since all four counties here discussed can be considered as developed, a deeper  
22 insight in cultural differences is needed. In cultures in which individual responsibility is  
23 considered as one of the main causes for self-fulfillment, health, and wealth, obesity  
24 might be perceived as a self-inflicted condition. Highly educated and more affluent  
25 people might attempt to keep people down in order to maintain their high social  
26 status. In contrast, in cultures in which individuals' situations are principally  
27 considered as a result of manifold circumstances, obesity might consequently not  
28 only be seen as self-inflicted. In these cultures especially highly educated and more  
29 affluent people might be aware of social barriers as determinants for self-fulfillment,  
30 wealth, and health, i.e. body weight. In conclusion, it might be possible that our  
31 working hypothesis is more applicable in countries or rather cultures in which the  
32 governmental and cultural structures enforce stigma as an instrument to 'nudge  
33 people into desired patterns of behavior' [29]. Hence, future research should consider  
34 an expansion and reorientation of stigma's theoretical framework by focusing on the  
35 meso and macro socio-cultural structures, as Bonnington and Rose [52] suggest.  
36  
37  
38  
39  
40  
41  
42  
43  
44  
45  
46

47 Furthermore, it seems striking that educational attainment is more likely to predict  
48 weight bias than participant's level of income. While educational attainment  
49 associates significantly with weight bias in eight out of fifteen studies, only three  
50 studies indicated an association between income and weight bias. Therefore, a  
51 possible explanation might be that income can be seen as a proxy variable for  
52 education. Suh and colleagues [32], for example, found a significant association  
53  
54  
55  
56  
57  
58  
59  
60

1  
2  
3 between low income and higher support for weight-related laws until they controlled  
4 for other sociodemographic variables, such as educational attainment.  
5  
6

## 7 **Limitations**

8  
9 Every review has its limitations, nor is this one immune to them. First, the current  
10 research only includes papers written in English or German. Second, just as any  
11 overview must contend with heterogeneous samples and instruments, this systematic  
12 review has likewise attempted to cope with varying data. The studies reviewed  
13 differed with respect to the instruments used to assess education and income. In  
14 particular, the measurement of educational attainment was strongly influenced by the  
15 different organization and structure of the varied local educational systems. In  
16 addition, the instruments to assess weight bias were also heterogeneous, particularly  
17 those used to measure stigmatizing attitudes. Furthermore, some studies used  
18 validated scales, whereas other studies used single items only. Thus, the manner of  
19 gathering data and classifying categories can be described as heterogeneous itself –  
20 and therefore caused the study team to decide against a meta-analysis.  
21  
22  
23  
24  
25  
26  
27  
28  
29

30 In addition, the study aimed to investigate socioeconomic determinants of weight bias  
31 in the general population, as discussed in the inclusion and exclusion section.  
32 Therefore, we excluded inter alia studies that focused on overweight and/or obese  
33 samples only. We assumed that people try to differentiate themselves from lower  
34 status groups, which might be characterized by varying body sizes, i.e. excess weight  
35 or obesity. However, overweight and obese samples were included as part of the  
36 general population in some studies. Also, these studies did not differentiate their  
37 results by participants' body sizes. In the general population we assume that people  
38 try to differentiate themselves not only by socioeconomic status but by other status  
39 markers as well, such as excess weight. Although we attempted to explain the  
40 heterogeneous and inconclusive results by appealing to governmental and cultural  
41 differences, there was insufficient evidence to reach a conclusion about the role of  
42 cultural and governmental structures on weight bias.  
43  
44  
45  
46  
47  
48  
49  
50  
51  
52  
53  
54  
55  
56  
57  
58  
59  
60

## Conclusion

The aim of the literature review was to investigate to what extent weight bias can be traced back to socioeconomic variables, such as educational attainment and level of income. It was assumed that a higher level of education or income leads to greater stigmatization and discrimination. Therefore, the current study situation was analyzed systematically. Although data of education and income are always collected as mandatory sociodemographic information, research is lacking when it comes to examining their impact on weight bias. Since this question has not yet been answered in a sufficient manner, this review was supposed to close this research gap.

Our working hypothesis that weight bias increases with higher educational attainment or level of income could not be verified. Particularly, we found 6 studies that supported our hypothesis, two German studies indicating the reverse conclusion, and seven studies that did not show a significant association at all.

The key to identifying effective interventions to battle stigmatization, discrimination, and consequences for those affected, might lie in exposing the characteristics of stigmatizing groups and their motivations. Therefore, future research should pay more attention to the link between weight bias and socioeconomic factors and cultural or rather governmental structures. Moreover, meta-analysis should be considered as an important direction for future research.

## Figure legends

Figure 1. Phases of the systematic review

Figure 2. Instruments assessing weight bias

## Funding Sources

This study was supported by the Federal Ministry of Education and Research (BMBF), Germany, FKZ: 01EO1501. The founding source had no involvement in study design, collection, analysis, and interpretation of data. Furthermore, we acknowledge support from the German Research Foundation (DFG) and University Leipzig within the program of Open Access Publishing.

## Disclosure Statement

The authors have no conflicts of interest to declare.

## Author contributions

MB, CLS and SRH outlined and specified the research question. MB and CLS conducted the systematic search of literature. Furthermore MB, CLS and TH discussed papers in detail in case of disagreement and uncertainty over the eligibility of abstracts. MB wrote the first draft of the manuscript. TH, SRH and CLS revised it critically for important intellectual content. All authors contributed to and have approved the final manuscript.

## Data sharing statement

No unpublished data is available following this study.



## REFERENCES

- 1 World Health Organization. Obesity and overweight 2018. Available at: <http://www.who.int/en/news-room/fact-sheets/detail/obesity-and-overweight> Accessed August 27, 2018.
- 2 Mensink G, Schienkiewitz A, Scheidt-Nave C. Overweight and obesity in Germany: Results of the German Health Interview and Examination Survey for Adults. *Bundesgesundheitsblatt - Gesundheitsforschung - Gesundheitsschutz* 2013;786–94.
- 3 Flegal KM, Kruszon-Moran D, Carroll MD, et al. Trends in Obesity Among Adults in the United States, 2005 to 2014. *JAMA* 2016;315(21):2284–91.
- 4 Pi-Sunyer X. The medical risks of obesity. *Postgrad Med* 2009;121(6):21–33.
- 5 Jung FUCE, Luck-Sikorski C, Wiemers N, et al. Dietitians and Nutritionists: Stigma in the Context of Obesity. A Systematic Review. *PLoS One* 2015;10(10):e0140276.
- 6 Puhl RM, Heuer CA. The stigma of obesity: a review and update. *Obesity (Silver Spring)* 2009;17(5):941–64.
- 7 Andreyeva T, Puhl RM, Brownell KD. Changes in perceived weight discrimination among Americans, 1995-1996 through 2004-2006. *Obesity (Silver Spring)* 2008;16(5):1129–34.
- 8 Spahlholz J, Baer N, König H-H, et al. Obesity and discrimination - a systematic review and meta-analysis of observational studies. *Obes Rev* 2016;17(1):43–55.
- 9 Puhl RM, Andreyeva T, Brownell KD. Perceptions of weight discrimination: prevalence and comparison to race and gender discrimination in America. *Int J Obes (Lond)* 2008;32(6):992–1000.
- 10 Hilbert A, Rief W, Braehler E. Stigmatizing attitudes toward obesity in a representative population-based sample. *Obesity (Silver Spring)* 2008;16(7):1529–34.
- 11 Rand CS, Wright BA. Continuity and change in the evaluation of ideal and acceptable body sizes across a wide age span. *Int J Eat Disord* 2000;28(1):90–100.
- 12 Schwartz MB, Chambliss HO, Brownell KD, et al. Weight bias among health professionals specializing in obesity. *Obes Res* 2003;11(9):1033–39.
- 13 Crandall CS. Prejudice against fat people: ideology and self-interest. *J Pers Soc Psychol* 1994;66(5):882–94.
- 14 Puhl RM, Schwartz MB, Brownell KD. Impact of perceived consensus on stereotypes about obese people: a new approach for reducing bias. *Health Psychol* 2005;24(5):517–25.
- 15 Latner JD, Stunkard AJ, Wilson GT. Stigmatized students: age, sex, and ethnicity effects in the stigmatization of obesity. *Obes Res* 2005;13(7):1226–31.
- 16 Perez-Lopez MS, Lewis RJ, Cash TF. The Relationship of Antifat Attitudes to Other Prejudicial and Gender-Related Attitudes1. *J Appl Social Psychol* 2001;31(4):683–97.
- 17 Link BG, Phelan J. Stigma power. *Soc Sci Med* 2014;103:24–32.
- 18 McLaren L. Socioeconomic status and obesity. *Epidemiol Rev* 2007;29:29–48.
- 19 Brewis AA, McGarvey ST, Jones J, et al. Perceptions of body size in Pacific Islanders. *Int J Obes* 1998;22(2):185–89.
- 20 Brewis AA, Wutich A, Falletta-Cowden A, et al. Body Norms and Fat Stigma in Global Perspective. *Current Anthropology* 2011;52(2):269–76.

- 1  
2  
3 21 Flint SW, Cadek M, Codreanu SC, et al. Obesity Discrimination in the Recruitment Process: "You're Not Hired!". *Front Psychol* 2016;7:647.
- 4  
5  
6 22 Agerstrom J, Rooth D-O. The role of automatic obesity stereotypes in real hiring discrimination. *J Appl Psychol* 2011;96(4):790–805.
- 7  
8 23 Puhl R, Brownell KD. Bias, discrimination, and obesity. *Obes Res* 2001;9(12):788–805.
- 9  
10 24 Flaskerud JH, DeLilly CR. Social determinants of health status. *Issues Ment Health Nurs* 2012;33(7):494–97.
- 11  
12 25 Bourdieu P. *Distinction: A social critique of the judgement of taste*, 1984th edn. Cambridge, Mass.: Harvard University Press 2000.
- 13  
14 26 Cockerham WC. Health lifestyle theory and the convergence of agency and structure. *Journal of Health and Social Behavior* 2005;46(1):51–67.
- 15  
16 27 Bourdieu P. What Makes a Social Class? On The Theoretical and Practical Existence Of Groups. *Berkeley Journal of Sociology* 1987;32:1–17.
- 17  
18 28 Phelan JC, Link BG, Dovidio JF. Stigma and prejudice: one animal or two? *Soc Sci Med* 2008;67(3):358–67.
- 19  
20 29 Tyler I, Slater T. Rethinking the sociology of stigma. *The Sociological Review* 2018;66(4):721–43.
- 21  
22 30 Moher D, Liberati A, Tetzlaff J, et al. Preferred reporting items for systematic reviews and meta-analyses: the PRISMA statement. *BMJ* 2009;339:b2535.
- 23  
24 31 Puhl RM, Liu S. A national survey of public views about the classification of obesity as a disease. *Obesity (Silver Spring)* 2015;23(6):1288–95.
- 25  
26 32 Suh Y, Puhl R, Liu S, et al. Support for laws to prohibit weight discrimination in the United States: public attitudes from 2011 to 2013. *Obesity (Silver Spring)* 2014;22(8):1872–79.
- 27  
28 33 Puhl RM, Heuer CA. Public opinion about laws to prohibit weight discrimination in the United States. *Obesity (Silver Spring)* 2011;19(1):74–82.
- 29  
30 34 Seo D-C, Torabi MR. Racial/ethnic differences in body mass index, morbidity and attitudes toward obesity among U.S. adults. *J Natl Med Assoc* 2006;98(8):1300–08.
- 31  
32 35 Lippa NC, Sanderson SC. Impact of information about obesity genomics on the stigmatization of overweight individuals: an experimental study. *Obesity (Silver Spring)* 2012;20(12):2367–76.
- 33  
34 36 Burmeister JM. Weight-related humor: Effects on expression of attitudes about obesity 2015.
- 35  
36 37 Puhl RM, Latner JD, O'Brien K, et al. A multinational examination of weight bias: predictors of anti-fat attitudes across four countries. *Int J Obes (Lond)* 2015;39(7):1166–73.
- 37  
38 38 Puhl RM, Latner JD, O'Brien KS, et al. Potential Policies and Laws to Prohibit Weight Discrimination: Public Views from 4 Countries. *Milbank Q* 2015;93(4):691–731.
- 39  
40 39 Sikorski C, Luppia M, Braehler E, et al. Obese children, adults and senior citizens in the eyes of the general public: results of a representative study on stigma and causation of obesity. *PLoS One* 2012;7(10):e46924.
- 41  
42 40 Brewis AA, Wutich A. Explicit versus implicit fat-stigma. *Am J Hum Biol* 2012;24(3):332–38.
- 43  
44 41 Jimenez-Cruz A, Escobar-Aznar YM de, Castillo-Ruiz O, et al. Beliefs about causes and consequences of obesity among women in two Mexican cities. *J Health Popul Nutr* 2012;30(3):311–16.
- 45  
46 42 Hansson LM, Rasmussen F. Attitudes towards obesity in the Swedish general population: the role of one's own body size, weight satisfaction, and controllability beliefs about obesity. *Body Image* 2014;11(1):43–50.
- 47  
48  
49  
50  
51  
52  
53  
54  
55  
56  
57  
58  
59  
60

- 1  
2  
3 43 Lund TB, Nielsen MEJ, Sandoe P. In a class of their own: the Danish public considers obesity less  
4 deserving of treatment compared with smoking-related diseases. *Eur J Clin Nutr*  
5 2015;69(4):514–18.  
6  
7 44 Swami V, Monk R. Weight bias against women in a university acceptance scenario. *J Gen*  
8 *Psychol* 2013;140(1):45–56.  
9  
10 45 Bacon JG, Scheltema KE, Robinson BE. Fat phobia scale revisited: the short form. *Int J Obes*  
11 *Relat Metab Disord* 2001;25(2):252–57.  
12  
13 46 Latner JD, O'Brien KS, Durso LE, et al. Weighing obesity stigma: the relative strength of different  
14 forms of bias. *Int J Obes (Lond)* 2008;32(7):1145–52.  
15  
16 47 Lewis RJ, Cash TF, Jacobi L, et al. Prejudice toward fat people: the development and validation  
17 of the antifat attitudes test. *Obes Res* 1997;5(4):297–307.  
18  
19 48 Allison, David B., Vincent C. Basile, and Harold E. Yuker. The measurement of attitudes toward  
20 and beliefs about obese persons. In: *International Journal of Eating Disorders* 10.5 (1991): 599-  
21 607.:599–607.  
22  
23 49 Greenwald AG, McGhee DE, Schwartz JL. Measuring individual differences in implicit cognition:  
24 the implicit association test. *J Pers Soc Psychol* 1998;74(6):1464–80.  
25  
26 50 Swami V, Salem N, Furnham A, et al. Initial examination of the validity and reliability of the  
27 female photographic figure rating scale for body image assessment. *Personality and Individual*  
28 *Differences* 2008;44(8):1752–61.  
29  
30 51 Gorman MJ, Butsch WS, Reilly-Harrington NA, et al. Stigma In Persons with Obesity. In: Parekh  
31 R, Childs EW, eds. *Stigma and Prejudice: Touchstones in Understanding Diversity in Healthcare*.  
32 Cham: Springer International Publishing 2016:23–40.  
33  
34 52 Bonnington O, Rose D. Exploring stigmatisation among people diagnosed with either bipolar  
35 disorder or borderline personality disorder: A critical realist analysis. *Soc Sci Med* 2014;123:7–  
36 17.  
37  
38  
39  
40  
41  
42  
43  
44  
45  
46  
47  
48  
49  
50  
51  
52  
53  
54  
55  
56  
57  
58  
59  
60

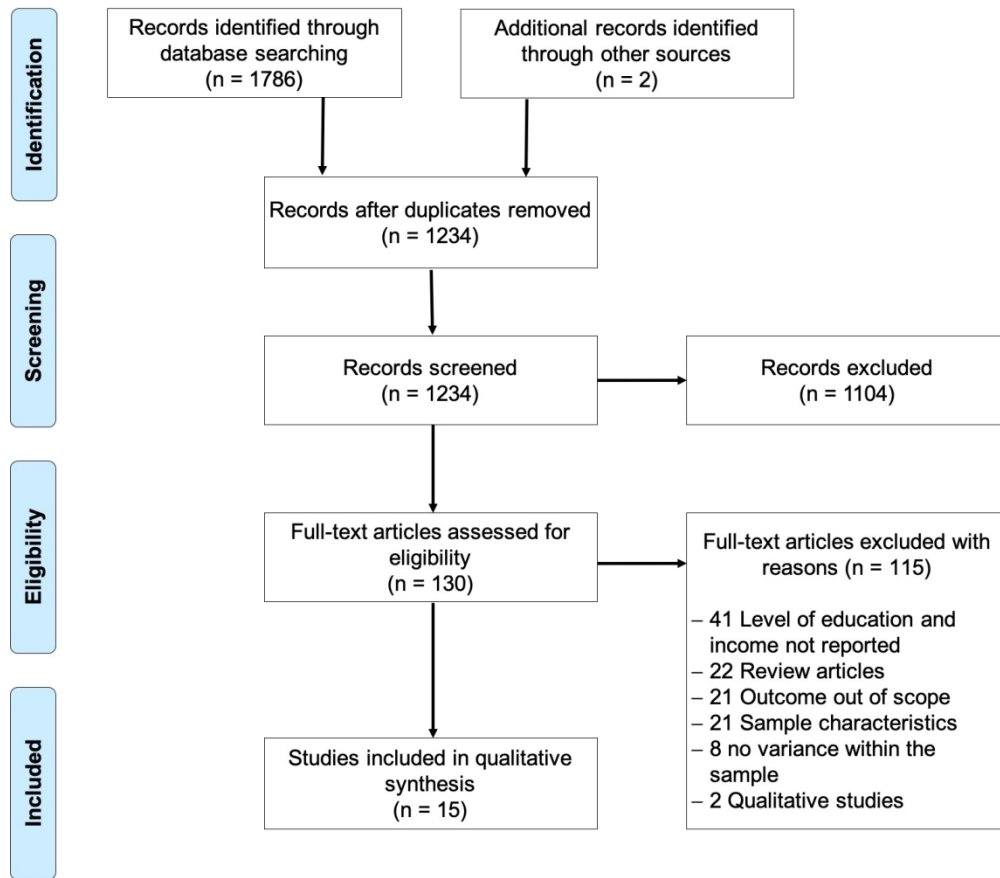

Figure 1. Phases of the systematic review

573x499mm (72 x 72 DPI)

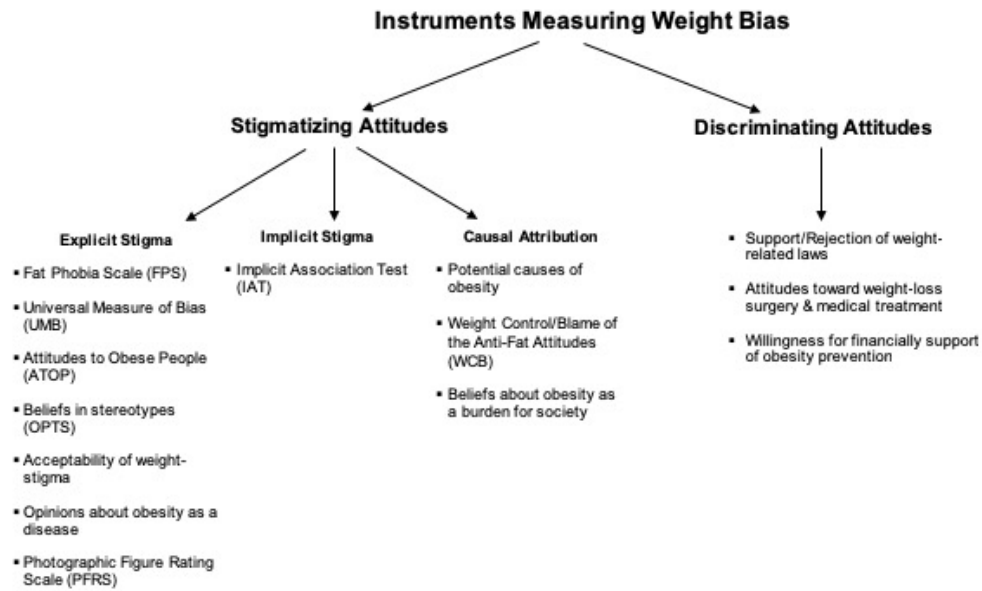

Figure 2. Instruments assessing weight bias

203x125mm (72 x 72 DPI)

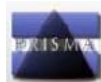

# PRISMA 2009 Checklist

| Section/topic                      | #  | Checklist item                                                                                                                                                                                                                                                                                              | Reported on page # |
|------------------------------------|----|-------------------------------------------------------------------------------------------------------------------------------------------------------------------------------------------------------------------------------------------------------------------------------------------------------------|--------------------|
| <b>TITLE</b>                       |    |                                                                                                                                                                                                                                                                                                             |                    |
| Title                              | 1  | Identify the report as a systematic review, meta-analysis, or both.                                                                                                                                                                                                                                         | 1                  |
| <b>ABSTRACT</b>                    |    |                                                                                                                                                                                                                                                                                                             |                    |
| Structured summary                 | 2  | Provide a structured summary including, as applicable: background; objectives; data sources; study eligibility criteria, participants, and interventions; study appraisal and synthesis methods; results; limitations; conclusions and implications of key findings; systematic review registration number. | 2                  |
| <b>INTRODUCTION</b>                |    |                                                                                                                                                                                                                                                                                                             |                    |
| Rationale                          | 3  | Describe the rationale for the review in the context of what is already known.                                                                                                                                                                                                                              | 3-5                |
| Objectives                         | 4  | Provide an explicit statement of questions being addressed with reference to participants, interventions, comparisons, outcomes, and study design (PICOS).                                                                                                                                                  | 5                  |
| <b>METHODS</b>                     |    |                                                                                                                                                                                                                                                                                                             |                    |
| Protocol and registration          | 5  | Indicate if a review protocol exists, if and where it can be accessed (e.g., Web address), and, if available, provide registration information including registration number.                                                                                                                               | -                  |
| Eligibility criteria               | 6  | Specify study characteristics (e.g., PICOS, length of follow-up) and report characteristics (e.g., years considered, language, publication status) used as criteria for eligibility, giving rationale.                                                                                                      | 5-7                |
| Information sources                | 7  | Describe all information sources (e.g., databases with dates of coverage, contact with study authors to identify additional studies) in the search and date last searched.                                                                                                                                  | 5-6                |
| Search                             | 8  | Present full electronic search strategy for at least one database, including any limits used, such that it could be repeated.                                                                                                                                                                               | 5-7                |
| Study selection                    | 9  | State the process for selecting studies (i.e., screening, eligibility, included in systematic review, and, if applicable, included in the meta-analysis).                                                                                                                                                   | 6-7                |
| Data collection process            | 10 | Describe method of data extraction from reports (e.g., piloted forms, independently, in duplicate) and any processes for obtaining and confirming data from investigators.                                                                                                                                  | 6-7                |
| Data items                         | 11 | List and define all variables for which data were sought (e.g., PICOS, funding sources) and any assumptions and simplifications made.                                                                                                                                                                       | 6                  |
| Risk of bias in individual studies | 12 | Describe methods used for assessing risk of bias of individual studies (including specification of whether this was done at the study or outcome level), and how this information is to be used in any data synthesis.                                                                                      | 6-7                |
| Summary measures                   | 13 | State the principal summary measures (e.g., risk ratio, difference in means).                                                                                                                                                                                                                               | 14-15              |
| Synthesis of results               | 14 | Describe the methods of handling data and combining results of studies, if done, including measures of consistency (e.g., $I^2$ ) for each meta-analysis.                                                                                                                                                   | No meta-analysis   |

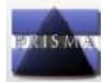

# PRISMA 2009 Checklist

Page 1 of 2

| Section/topic                 | #  | Checklist item                                                                                                                                                                                           | Reported on page # |
|-------------------------------|----|----------------------------------------------------------------------------------------------------------------------------------------------------------------------------------------------------------|--------------------|
| Risk of bias across studies   | 15 | Specify any assessment of risk of bias that may affect the cumulative evidence (e.g., publication bias, selective reporting within studies).                                                             | 5                  |
| Additional analyses           | 16 | Describe methods of additional analyses (e.g., sensitivity or subgroup analyses, meta-regression), if done, indicating which were pre-specified.                                                         | No meta-analysis   |
| <b>RESULTS</b>                |    |                                                                                                                                                                                                          |                    |
| Study selection               | 17 | Give numbers of studies screened, assessed for eligibility, and included in the review, with reasons for exclusions at each stage, ideally with a flow diagram.                                          | 6                  |
| Study characteristics         | 18 | For each study, present characteristics for which data were extracted (e.g., study size, PICOS, follow-up period) and provide the citations.                                                             | 10-13              |
| Risk of bias within studies   | 19 | Present data on risk of bias of each study and, if available, any outcome level assessment (see item 12).                                                                                                | 5                  |
| Results of individual studies | 20 | For all outcomes considered (benefits or harms), present, for each study: (a) simple summary data for each intervention group (b) effect estimates and confidence intervals, ideally with a forest plot. | 11-14              |
| Synthesis of results          | 21 | Present results of each meta-analysis done, including confidence intervals and measures of consistency.                                                                                                  | No meta-analysis   |
| Risk of bias across studies   | 22 | Present results of any assessment of risk of bias across studies (see Item 15).                                                                                                                          | 5                  |
| Additional analysis           | 23 | Give results of additional analyses, if done (e.g., sensitivity or subgroup analyses, meta-regression [see Item 16]).                                                                                    | -                  |
| <b>DISCUSSION</b>             |    |                                                                                                                                                                                                          |                    |
| Summary of evidence           | 24 | Summarize the main findings including the strength of evidence for each main outcome; consider their relevance to key groups (e.g., healthcare providers, users, and policy makers).                     | 15-18              |
| Limitations                   | 25 | Discuss limitations at study and outcome level (e.g., risk of bias), and at review-level (e.g., incomplete retrieval of identified research, reporting bias).                                            | 20                 |
| Conclusions                   | 26 | Provide a general interpretation of the results in the context of other evidence, and implications for future research.                                                                                  | 18-20              |
| <b>FUNDING</b>                |    |                                                                                                                                                                                                          |                    |
| Funding                       | 27 | Describe sources of funding for the systematic review and other support (e.g., supply of data); role of funders for the systematic review.                                                               | 22                 |

From: Moher D, Liberati A, Tetzlaff J, Altman DG, The PRISMA Group (2009). Preferred Reporting Items for Systematic Reviews and Meta-Analyses: The PRISMA Statement. PLoS Med 6(7): e1000097. doi:10.1371/journal.pmed1000097

For more information, visit: [www.prisma-statement.org](http://www.prisma-statement.org).

For peer review only - <http://bmjopen.bmj.com/site/about/guidelines.xhtml>

# BMJ Open

## Does weight-related stigmatization and discrimination depend on educational attainment and level of income? A systematic review

|                                 |                                                                                                                                                                                                                                                                                                                                                                                                                                                                                                                        |
|---------------------------------|------------------------------------------------------------------------------------------------------------------------------------------------------------------------------------------------------------------------------------------------------------------------------------------------------------------------------------------------------------------------------------------------------------------------------------------------------------------------------------------------------------------------|
| Journal:                        | <i>BMJ Open</i>                                                                                                                                                                                                                                                                                                                                                                                                                                                                                                        |
| Manuscript ID                   | bmjopen-2018-027673.R1                                                                                                                                                                                                                                                                                                                                                                                                                                                                                                 |
| Article Type:                   | Original research                                                                                                                                                                                                                                                                                                                                                                                                                                                                                                      |
| Date Submitted by the Author:   | 16-Aug-2019                                                                                                                                                                                                                                                                                                                                                                                                                                                                                                            |
| Complete List of Authors:       | Bernard, Marie; Integrated Research and Treatment Center AdiposityDiseases (IFB), University of Leipzig; SRH University of Applied Health Sciences, Fankhänel, Thomas; SRH University of Applied Health Sciences, Riedel-Heller, Steffi; University of Leipzig, Institute of Social Medicine, Occupational Health and Public Health (ISAP), Medical Faculty Luck-Sikorski, Claudia; Integrated Research and Treatment Center AdiposityDiseases (IFB), University of Leipzig; SRH University of Applied Health Sciences |
| <b>Primary Subject Heading</b>: | Sociology                                                                                                                                                                                                                                                                                                                                                                                                                                                                                                              |
| Secondary Subject Heading:      | Sociology, Public health                                                                                                                                                                                                                                                                                                                                                                                                                                                                                               |
| Keywords:                       | obesity, stigma, discrimination, education, income                                                                                                                                                                                                                                                                                                                                                                                                                                                                     |
|                                 |                                                                                                                                                                                                                                                                                                                                                                                                                                                                                                                        |

SCHOLARONE™  
Manuscripts



1  
2  
3 1 Does weight-related stigmatization and discrimination depend on  
4  
5 2 educational attainment and level of income?  
6  
7 3 A systematic review  
8  
9

---

10 4 **Bernard, Marie** <sup>a,b,\*</sup>, **Fankhänel, Thomas** <sup>b</sup>, **Riedel-Heller, Steffi G.** <sup>c</sup>, **Luck-Sikorski, Claudia** <sup>a,b</sup>

- 11 5  
12 6  
13 7  
14 8  
15 9  
16 10  
17 11  
18 12  
19 13  
20 14  
21 15  
22 16  
23 17  
24 18  
25 19  
26 20  
27 21  
28 22  
29 23  
30 24  
31 25
- <sup>a</sup> Integrated Research and Treatment Center AdiposityDiseases (IFB), University of Leipzig, Philipp-Rosenthal-Straße 27, 04103 Leipzig, Germany
  - <sup>b</sup> SRH University of Applied Health Sciences, Neue Straße 28-30, 07548 Gera, Germany
  - <sup>c</sup> Institute of Social Medicine, Occupational Health and Public Health (ISAP), University of Leipzig, Philipp-Rosenthal-Straße 55, 04103 Leipzig, Germany

\* Corresponding author

**Marie Bernard**

Leipzig University Medical Center  
IFB Adiposity Diseases  
Philipp-Rosenthal-Straße 27  
04103 Leipzig, Germany  
Tel.: 0049365-773407-42

E-Mail: [marie.bernard@medizin.uni-leipzig.de](mailto:marie.bernard@medizin.uni-leipzig.de)

Word count 5,327

## 26 **Abstract**

27 **Objectives:** Obesity is considered a global health issue, not only because of its health-related  
28 consequences but also because of its impact on social status as a result of stigma. This study  
29 aims to review the quantitative state of research regarding socioeconomic characteristics'  
30 influence on weight-related stigmatization and discrimination. Based on Bourdieu's Theory of  
31 Class and his concept of "habitus," it is assumed that people with a higher level of education  
32 and income show stronger negative attitudes toward people with obesity.

33 **Method:** A narrative systematic literature review was conducted in 2017 using PubMed,  
34 PsychINFO, Web of Science, and the Cochrane Library. Seventeen studies that measured  
35 weight bias and either educational attainment or level of income were included in the analysis.

36 **Results:** The results of the studies included were inconsistent: six of these studies were found  
37 to support the hypothesis, whereas two of the studies contradicted it. The remaining seven  
38 studies did not show any significant correlation between weight bias and either education or  
39 income.

40 **Conclusion:** In light of the inconsistent and heterogeneous results of the studies that report a  
41 significant association between weight bias and socioeconomic variables, the findings must be  
42 discussed concerning their cultural context, i.e., cultural and governmental differences.  
43 Furthermore, educational attainment seems to be more likely to predict weight bias than  
44 income. The review revealed a lack of research when it came to examining the impact of  
45 socioeconomic capital on weight bias.

46 **Keywords:** obesity, stigma, discrimination, education, income

### 47 **Strength and limitations of this study**

- 48     ▪ A systematic review following the PRISMA guidelines was conducted to investigate the  
49 relationship between weight bias and the socioeconomic status of studies published in  
50 English or German.
- 51     ▪ Study selection was performed by two independent reviewers to minimize subjectivity  
52 and random errors.
- 53     ▪ This study is limited since no meta-analysis could be performed due to divergent study  
54 designs, instruments used, or different ways items were operationalized for statistical  
55 analysis

## 56 Introduction

57 According to the World Health Organization (WHO), the worldwide prevalence of  
58 obesity, defined by a body mass index (BMI) of over 30 kg/m<sup>2</sup>, nearly tripled between  
59 1975 and 2016 [1]. To give but two examples, current data reveal an obesity rate of  
60 over 21% in Germany and 37.7% in the US [2, 3]. With its escalating rate, obesity can  
61 be classified as a global health issue, primarily because it is associated with numerous  
62 comorbid diseases, such as diabetes mellitus, cardiovascular diseases, and certain  
63 forms of cancer [4].

64  
65 Not only health-related consequences are connected to obesity, but also psychological  
66 implications that affect those concerned on a social level [5]. In particular, obesity is  
67 classified as a stigmatized condition. Therefore, being obese is a characteristic that  
68 sets those affected apart from people with normal weight. Since obesity is mislabeled  
69 as a self-inflicted situation, numerous negative stereotypes, such as laziness, lack of  
70 willpower, unhealthy lifestyle, and being unintelligent are associated with the condition  
71 [6, 7]. Stigmatization leads to discriminating behavior toward people with obesity in the  
72 form of mistreatment in several areas of life, such as labor market, healthcare, and  
73 educational system [6, 7].

74 The systematic review of Spahlholz [8] revealed increased perceived discrimination  
75 toward people with obesity in comparison to people with normal weight, especially  
76 toward people with more extreme obesity (BMI >35 kg/m<sup>2</sup>) as well as toward women.  
77 Moreover, the prevalence of weight-related discrimination accelerated over time. In the  
78 US, the prevalence of weight-related discrimination was nine times higher (66%) in  
79 2005 than in 1995 (7.3%) [7, 8] and is thus similar to the rate of racial discrimination,  
80 particularly against women [9]. Understanding the origin of stigma, which can be seen  
81 as the catalyst for structural discrimination, is necessary to prevent discriminating  
82 behavior. Although weight-related stigmatization and discrimination are closely linked,  
83 they need to be considered as two divergent concepts. However, in the following, we  
84 will refer to weight-related stigmatization and discrimination as “weight bias”, but will  
85 differentiate between both concepts whenever needed.

86 Some people are more prone to display weight bias than other: There is some evidence  
87 that older age is associated with stigmatizing attitudes [10–12] and stronger evidence

1  
2  
3 88 that men show stronger weight bias than women [13–16]. When looking at the body  
4  
5 89 and beauty perception of people, the cultural framework also needs to be considered  
6  
7 90 as a determinant of stigma. According to Bourdieu, the predominant cultural context  
8  
9 91 determines which values and characteristics can be seen either as desirable or traits  
10  
11 92 to be stigmatized [17]. Depending on regional characteristics, weight is perceived as a  
12  
13 93 sign of class distinction: In undeveloped countries, overweight was associated  
14  
15 94 positively with well-being and wealth, while in developed countries a negative view of  
16  
17 95 being overweight was widespread. Thus, in developed countries, thinness has been  
18  
19 96 viewed as a sign of beauty, success, and an overall high (socioeconomic) status [18].  
20  
21 97 Although in the last decades the perception of obesity or rather slim-body ideals  
22  
23 98 developing countries might have changed [19, 20], results indicate that educational  
24  
25 99 attainment and level of income seem to be relevant regarding weight bias.

100  
101 Although socioeconomic variables and obesity correlate closely, the impact of  
102  
103 educational attainment and level of income on weight bias remain ambiguous. Several  
104  
105 studies have shown the negative impact of being overweight on the labor market,  
106  
107 especially for women [21, 22] as well as in the education system [23]. In addition, a  
108  
109 lower level of education and income is associated with obesogenic behavior such as  
110  
111 a poor diet and a lack of exercise caused by factors such as stress [24]. Moreover,  
112  
113 Bourdieu [25] sees the most decisive determinant of a healthy lifestyle in  
114  
115 socioeconomic class. While people that belong to the working class preferred tasty  
116  
117 and nutritious food, people from the upper-middle class preferred food that can be  
118  
119 described as light, healthy, and low in calories, according to his study. Subsequently,  
120  
121 people with a higher level of education and income might choose a healthier lifestyle  
122  
123 to distance themselves from people with obesity [26].

124  
125 As a superior framework to generate missing hypotheses, Bourdieu's Theory of Class  
126  
127 can be applied [25]. Following his concept of "habitus," a person's general attitude,  
128  
129 lifestyle, and even body shape can be seen as a metaphor for social status [18].  
130  
131 Furthermore, Bourdieu considers stigma as a form of symbolic power and a tool to  
132  
133 serve the interests of the powerful [27]. Phelan and colleagues [28] continue with his  
134  
135 line thought and presented three motives of stigma, namely *keeping people in, away,*  
136  
137 or *down*. Particularly, *keeping people down* applies to the review's theoretical

1  
2  
3 120 framework. Link and Phelan [17] discuss stigma as an instrument of a dominant group  
4  
5 121 to keep another group down to attain or maintain high social status, wealth, and power.  
6  
7 122 However, a person's educational attainment and level of income are mainly invisible  
8  
9 123 characteristics; thus, there are other attributes that more readily show social status.  
10  
11 124 Assuming that obesity is perceived as a metaphor for lower social status, groups with  
12  
13 125 higher social status might be aware of this link and keep people with obesity down to  
14  
15 126 empower themselves. In this review, it is therefore assumed that people with a higher  
16  
17 127 level of education and income display negative attitudes toward people with obesity in  
18  
19 128 comparison to people with lower educational attainment and income. The impact of  
20  
21 129 educational attainment and level of income on weight bias will be examined and  
22  
23 130 compared.

24  
25 131  
26  
27 132 Based on a sociological perspective, this systematic literature review attempts to  
28  
29 133 outline the current state of research and reveal the relationship between weight bias  
30  
31 134 and the level of education and income. Tyler and Slater [29] criticized inter alia "*that*  
32  
33 135 *one of the major limitations of existing understandings of stigma is the ways in which*  
34  
35 136 *they have 'bracketed off' key questions, such as where stigmatizing attitudes come*  
36  
37 137 *from, how and by whom is stigma crafted, mediated, produced and why [...].*" The  
38  
39 138 general aim of this review is thus to identify social and economic groups that stigmatize  
40  
41 139 and discriminate against those who are obese. In the future, this information could help  
42  
43 140 researchers to develop and implement interventions in a more targeted manner.

## 44 45 141 **Methods**

### 46 47 142 Search Strategy

48  
49 143 A systematic review of published studies reporting weight-related attitudes held by  
50  
51 144 differing socioeconomic status groups was conducted by using the relevant scientific  
52  
53 145 electronic databases: PubMed, PsychINFO, Web of Science, and the Cochrane  
54  
55 146 Library. The review followed the Prisma Guidelines [30].

56  
57 147 The systematic review of literature was performed independently by two reviewers  
58  
59 148 using the following keywords: stigma\*, discrimination, "weight bias", or prejudice;  
60  
149 education\*, income, salary, wage, status, socio-economic, socioeconomic\*, SES,  
150 sociodemographic, or socio-demographics; and obes\*, overweight, or fat. Giving a very

1  
2  
3 151 high number of results, the literature search was limited to the publications' titles and  
4  
5 152 abstracts. Only published studies written in English or German were included. There  
6  
7 153 was no restriction regarding the year of publication. The stages of the systematic  
8  
9 154 literature search are provided in Fig. 1. The literature review was conducted for all  
10  
11 155 studies that have been published until June 2019.

### 12 156 Data extraction

14 157 The systematic search of the literature revealed 2,331 studies, whereby 1,708 studies  
15  
16 158 remained after removing duplicates. Furthermore, 1,510 studies were excluded  
17  
18 159 because screening their titles and abstracts for eligibility showed no association with  
19  
20 160 the research question. Disagreement and uncertainty between the two reviewers over  
21  
22 161 the eligibility were resolved by reinspecting the papers in detail and discussing  
23  
24 162 disparate perspectives. For the remaining 198 studies, full articles were screened in  
25  
26 163 detail to assess their eligibility. For data extraction we used an adjusted PICO scheme  
27  
28 164 [31]: Studies that collected data of an adult sample (P) which assessed stigmatizing  
29  
30 165 and discriminating attitudes (I) depending on socioeconomic variables (C) to  
31  
32 166 investigate if weight bias is associated with socioeconomic status (O). The detailed  
33  
34 167 inclusion and exclusion criteria are presented in the following.

### 34 168 Inclusion criteria

36 169 Studies that report associations between weight bias and either educational attainment  
37  
38 170 or level of income were included. Weight bias was operationalized to reflect  
39  
40 171 stigmatizing and discriminating attitudes. Therefore, studies that measured  
41  
42 172 stigmatizing attitudes by applying explicit and implicit instruments will be included, but  
43  
44 173 also studies that assessed causal beliefs about obesity, which can be considered as  
45  
46 174 proxy variable as previously done before [32]. Studies that assessed discriminating  
47  
48 175 attitudes, for example, by measuring the support for weight-related antidiscrimination  
49  
50 176 policies and law, or considering obesity as a financial burden are considered for  
51  
52 177 inclusion. According to Woolford et al. [33], who found less support to cover obesity-  
53  
54 178 related costs by public health insurances, the public's opinion can be seen as a  
55  
56 179 potential guideline for insurance funds [33]. In other words, based on the public's view,  
57  
58 180 discrimination might occur in the field of health insurance policies. This assumption  
59  
60

1  
2  
3 181 might be of particular importance when considering the increased obesity-related  
4  
5 182 healthcare cost [34].  
6

7 183 Exclusion criteria  
8

9 184 The following exclusion criteria were used to eliminate studies that were not applicable:  
10  
11 185 (a) studies with a sample of health care professionals, dietitians, psychologists, and  
12  
13 186 physical educators; (b) studies that investigated stigmatizing attitudes of children  
14  
15 187 and/or adolescents; (c) studies that investigated stigma toward childhood obesity; (d)  
16  
17 188 studies with an overweight and/or obese sample that investigated perceived  
18  
19 189 stigmatization; (e) studies with a homogenous sample in regard to educational  
20  
21 190 attainment (e.g., students) or level of income; (f) studies that investigated weight bias  
22  
23 191 toward extended stigma groups (e.g., obese and binge eating); and (g) reviews or  
24  
25 192 qualitative studies. The flowchart (Figure 1) displays how many studies were excluded  
26  
27 193 in accordance with the exclusion criteria. In summary, 50 studies were excluded  
28  
29 194 because they did not report the participants' educational attainment or income. In  
30  
31 195 addition, 29 studies did assess data of a sample with no variance concerning  
32  
33 196 socioeconomic characteristics, and 23 studies were excluded because of the samples'  
34  
35 197 characteristics (overweight/obese or children/adolescents sample). Five studies were  
36  
37 198 excluded because they followed a qualitative approach, and 34 studies were excluded  
38  
39 199 because they could be categorized as reviews. Thirty-nine studies were found that did  
40  
41 200 not meet the criteria for the aimed outcome of weight bias. Two studies were neither  
42  
43 201 published in English nor German.

40 202 Moreover, one paper had to be excluded because of its lack of academic background.  
41  
42 203 After excluding the studies that did not meet our criteria, 17 studies were identified as  
43  
44 204 relevant for in-depth investigation (Figure 1). Therefore, sampling characteristics,  
45  
46 205 study design, assessment of weight bias, and measurement of educational attainment  
47  
48 206 and income were systematically examined.

49 207 Assessment of Risk of Bias  
50

51 208 We assessed the risk of bias of all studies included using the Appraisal tool for Cross-  
52  
53 209 Sectional Studies (AXIS) developed by Downes and colleagues [35]. The studies were  
54  
55 210 therefore examined regarding potential causes that might induce a specific risk of bias.  
56  
57 211 Despite a risk of bias due to non-responds that might occur among every study, the  
58  
59  
60

212 majority of studies included showed a low risk of bias. Only a few studies were detected  
213 to be at moderate risk of bias concerning the sampling procedure [36–41]. The  
214 summarized risk of bias assessment of all studies included is provided as  
215 supplementary material.

### 216 Patient and Public Involvement

217 Within this study, no patient data was collected. We conducted a systematic review  
218 and analyzed data that had already been collected. Thus, patients were not involved  
219 in this study.

## 220 **Results**

221 The 17 studies included were tabulated according to the following characteristics: the  
222 origin of the sample, sample size (N), sample characteristics, study design,  
223 instruments to assess weight bias, educational attainment or income, and a summary  
224 of results. Studies reviewed in detail are tabulated by either educational attainment  
225 (**Error! Reference source not found.**) or by the level of income (Table 2).

### 226 Study characteristics

227 All relevant study characteristics are summarized in Table 1 and Table 2, respectively.  
228 Eight out of seventeen studies are based entirely on an American sample [10, 42, 42,  
229 42]. Two other studies are based on an American and an Icelandic sample [43, 44].  
230 These two studies also provided data based on a Canadian sample of health care  
231 professionals and American, Australian, and Icelandic student samples that did not  
232 meet the inclusion criteria and therefore all four samples had to be excluded. Three  
233 studies were based on a German sample [10, 42], and five studies based on one  
234 sample, from Paraguay [36], Mexico [38], Sweden [37], Denmark [40], and Great  
235 Britain [41] respectively. The study by Brewis and Wutich [36], based on a Paraguayan  
236 sample also provided data of a comparison group of US-undergraduate students that  
237 were not considered in the analysis because of the homogenous study sample in terms  
238 of educational attainment. The seventeen studies included showed a wide variety of  
239 sample sizes ranging from 198 [41] to 3,502 participants [45].

240 Since the aim of the study was to outline the impact that socioeconomic status in the  
241 form of educational attainment and level of income have on weight bias, attention was



1  
2  
3 242 paid to a variation in these variables within the samples. The studies included therefore  
4  
5 243 focused either on a population-based sample [10, 37, 42, 46–48] or an convenience  
6  
7 244 sample [40, 43–45, 49, 50]. Although Jiminez-Cruz and colleagues [38] investigated  
8  
9 245 stigmatizing attitudes of an entirely low-income sample, they divided the  
10  
11 246 socioeconomic factors (level of education and income) into five and four categories  
12  
13 247 respectively; thus, variation within the sample could be ensured. Moreover, an  
14  
15 248 investigation of weight bias in different gradations of lower status groups could provide  
16  
17 249 further insight into the topic. In one study [39], the general population was included,  
18  
19 250 whereby the overweight participants received an alternative questionnaire assessing  
20  
21 251 the perceived stigmatization and not their stigmatizing attitudes toward obesity.  
22  
23 252 Therefore, only the normal weight sample could be included.

24  
25 253 The distribution of women and men was equally considered in the majority of studies,  
26  
27 254 even though more women than men were included. However, two studies posed an  
28  
29 255 exception. The study of Brewis et al. [36] and the study of Jiminez-Cruz [38]  
30  
31 256 investigated only the stigmatizing attitudes of female participants.  
32  
33  
34  
35  
36  
37  
38  
39  
40  
41  
42  
43  
44  
45  
46  
47  
48  
49  
50  
51  
52  
53  
54  
55  
56  
57  
58  
59  
60

257 Table 1 Summary of Selected Studies: Weight Bias Depending on Educational Attainment

| Study                                              | N     | Sample Discription                                       | Instruments Weight bias             | Educational attainment                                                                                                              | Association's Direction <sup>1</sup> | Magnitude of Association                                                                                                                                                                                                                                                             |
|----------------------------------------------------|-------|----------------------------------------------------------|-------------------------------------|-------------------------------------------------------------------------------------------------------------------------------------|--------------------------------------|--------------------------------------------------------------------------------------------------------------------------------------------------------------------------------------------------------------------------------------------------------------------------------------|
| <b>Form of weight bias: stigmatizing attitudes</b> |       |                                                          |                                     |                                                                                                                                     |                                      |                                                                                                                                                                                                                                                                                      |
| [42]; GER                                          | 3003  | population based<br>(ø age: 51.7 years;<br>52.8% female) | Short-FPS[1]                        | 4 subgroups:<br>- No degree<br>- 9 <sup>th</sup> grade degree<br>- 10 <sup>th</sup> grade degree<br>- 12 <sup>th</sup> grade degree | <b>Negative</b>                      | Multivariate Regression:<br>- No degree = reference category<br>- 9th grade: $\beta = -0.278$ , $p < 0.01$ , (std. error 0.0852)<br>- 10th grade: $\beta = -0.251$ , $p < 0.01$ (std. error 0.0838)<br>- Upper secondary school: $\beta = -0.214$ , $p < 0.05$ , (std. error 0.0835) |
| [10]; GER                                          | 960   | US adults<br>(ø age: 43.8 years;<br>50.2% female)        | WCB [2];                            | 2 subgroups:<br>- Low; <13 years of education)<br>- High; $\geq 13$ years of education)                                             | <b>Negative</b>                      | Multiple linear regression<br>- $\beta = -0.16$ , $p < 0.001$<br><br>Zero-order association<br>- $r = -0.18$ , $p < 0.0001$                                                                                                                                                          |
| [38]; MEX                                          | 1,100 | Women aged 18-40<br>of low SES (ø age:<br>37.5 years)    | Beliefs about the causes of obesity | 5 subgroups:<br>- None<br>- some elementary<br>- elementary<br>- middle<br>- high school                                            | <b>Positive</b>                      | Logistic regression<br>- "Having an unhealthy lifestyle": unadjusted OR=2.56, $p < 0.001$ , Confidence Interval 1.88-3.49                                                                                                                                                            |
| [43]; USA and ISL                                  | 899   | US adults<br>(ø age: 40.9 years;<br>46.1% female)        | Short-FPS [1];<br>UMB-FAT [3]       | 3 subgroups:<br>- High school or less<br>- Some college/technical or vocation degree<br>- College graduate or higher                | FPS:<br>Mixed                        | Linear regression:<br>- High school or less = reference category<br>- Vocational training/some college ( $\beta = 0.202$ , $p < 0.05$ )<br>- College ( $\beta = 0.141$ , $p > 0.1$ )<br>- Postgraduate ( $\beta = -0.017$ , $p > 0.1$ )                                              |
|                                                    |       |                                                          |                                     |                                                                                                                                     | UMB-Fat: Positive                    | Linear regression:<br>- High school or less = reference category<br>- Vocational training/some college: $\beta = 0.102$ , $p > 0.1$<br>- College: $\beta = 0.189$ , $p < 0.05$<br>- Postgraduate: $\beta = 0.034$ , $p > 0.1$                                                        |
|                                                    |       |                                                          |                                     |                                                                                                                                     | FPS:<br>Positive                     | Linear regression:<br>- High school or less = reference category<br>- College: $\beta = 0.068$ , $p > 0.1$                                                                                                                                                                           |
|                                                    | 659   | ISL adults<br>(ø age: 45.9 years;<br>55.1% female)       |                                     | 2 subgroups:<br>- High school or less<br>- College                                                                                  | UMB-Fat: <b>Positive</b>             | Linear regression:<br>- High school or less = reference category<br>- College: $\beta = 0.160$ , $p < 0.05$                                                                                                                                                                          |

|                                                                             |       |                                                                              |                                                         |                                                                                                                                                               |          |                                                                                                                                                                                                                                                                                                                                                                                                                                                               |
|-----------------------------------------------------------------------------|-------|------------------------------------------------------------------------------|---------------------------------------------------------|---------------------------------------------------------------------------------------------------------------------------------------------------------------|----------|---------------------------------------------------------------------------------------------------------------------------------------------------------------------------------------------------------------------------------------------------------------------------------------------------------------------------------------------------------------------------------------------------------------------------------------------------------------|
| [37]; SWE                                                                   | 2,436 | Representative Swedish population aged 25-64 (ø age: 47.8 years; 63% female) | ATOP [4]                                                | 3 subgroups:<br>- Low<br>- Medium<br>- High                                                                                                                   | Negative | Spearman zero-order correlations:<br>- $r = -0.023$ , $p = 0.260$                                                                                                                                                                                                                                                                                                                                                                                             |
| [49]; USA                                                                   | 1,118 | US adults (ø age: 43.8 years; 50.2% female)                                  | Opinions about obesity as a disease [5]                 | 3 subgroups:<br>- High school or less<br>- Some college/ Technical or vocation degree<br>- College graduate or higher                                         | Mixed    | Linear regression<br>- High school or less = reference category<br>Agreement with statements in support of classification<br>- Some college/ technical degree: $\beta = -0.036$ , $p > 0.1$<br>- College graduate or higher: $\beta = 0.035$ , $p > 0.1$<br>Agreement with statements in support of classification<br>- Some college/ technical degree: $\beta = -0.03$ , $p > 0.1$<br>- College graduate or higher: $\beta = 0.095$ , $p < 0.1$ but $> 0.05$ |
| [41]; GB                                                                    | 198   | Community-based (ø age: 32.58 year; 50.5% female)                            | PFRS [6]                                                | 5 subgroups<br>- General Certification of Secondary Education<br>- Advanced Level<br>- Undergraduate degree<br>- Postgraduate degree<br>- other qualification | /        | Univariate analysis of variance (ANOVA):<br>- $F(1, 197) = 0.47$ , $p = .705$ , $\eta^2 < 0.01$                                                                                                                                                                                                                                                                                                                                                               |
| [39]; USA                                                                   | 396   | General, not overweight population (ø age: 42.7 years; 43.7% female)         | Short-FPS[1]                                            | 3 subgroups:<br>- High school or less<br>- Some college/associate degree<br>- Bachelor's degree or higher                                                     | /        | Adjusted model of correlates:<br>- $F(2) = 0.026$ , $p = 0.974$                                                                                                                                                                                                                                                                                                                                                                                               |
| [36]; PRY                                                                   | 200   | Women (ø age: 38.9 years)                                                    | ATOP [4]; IAT [7]                                       | Metric measurement: years of formal education                                                                                                                 | /        | /                                                                                                                                                                                                                                                                                                                                                                                                                                                             |
| <b>Form of weight bias: both, stigmatizing and discriminating attitudes</b> |       |                                                                              |                                                         |                                                                                                                                                               |          |                                                                                                                                                                                                                                                                                                                                                                                                                                                               |
| [47]; USA                                                                   | 981   | US representative sample (62% female)                                        | Beliefs about obesity as a financial burden for society | 4 subgroups:<br>- Less than some high school<br>- High-school graduate<br>- Some college<br>- Higher than a college degree                                    | Positive | Logistic regression<br>- $\leq$ some HS: adjusted OR= 0.25, $p < 0.05$<br>- Some College: adjusted OR= 1.61, $p < 0.05$<br>- $\geq$ College: adjusted OR= 1.97, $p < 0.01$                                                                                                                                                                                                                                                                                    |
|                                                                             |       |                                                                              | Beliefs about the controllability of obesity            |                                                                                                                                                               | Mixed    | Logistic regression<br>- $\leq$ some HS: adjusted OR= 0.99, $p > 0.05$<br>- Some College: adjusted OR= 0.90, $p > 0.05$<br>- $\geq$ College: adjusted OR= 1.68, $p > 0.05$                                                                                                                                                                                                                                                                                    |

258

| Form of weight bias: discriminating attitudes |       |                                                        |                                                                                                                           |                                                                                                                              |                 |                                                                                                                                                                                                                                                                                                                                                                                                                                   |
|-----------------------------------------------|-------|--------------------------------------------------------|---------------------------------------------------------------------------------------------------------------------------|------------------------------------------------------------------------------------------------------------------------------|-----------------|-----------------------------------------------------------------------------------------------------------------------------------------------------------------------------------------------------------------------------------------------------------------------------------------------------------------------------------------------------------------------------------------------------------------------------------|
| [50]; USA                                     | 1,114 | Adults (ø age: 44.87 years; 48% female)                | 6 Statements assessing support of general and employment-specific antidiscrimination laws or policies                     | 3 subgroups:<br>- High school or GED completed<br>- 2-Year vocational/technical degree or some college<br>- College graduate | <b>Positive</b> | Ordinal logistic regression, for all 6 statements<br>- High school/GED = reference category<br>- College: OR 0.28-0.49, p<0.05)                                                                                                                                                                                                                                                                                                   |
| [45]; USA                                     | 3,502 | Adults (age 21-65; 61.9% female)                       | 3 statements assessing support of legal protection and employment-specific antidiscrimination laws or policies            | 3 Subgroups:<br>- High school or less<br>- some college/ technical or vocation degree<br>- College graduate or higher        | <b>Positive</b> | Multiple logistic regression<br>- High school or less = reference category<br>- Some college/Technical or vocation degree<br>▪ Law 1: adjusted OR=0.7, p>0.01<br>▪ Law 2: adjusted OR=0.9, p>0.05<br>▪ Law 3: adjusted OR=1.2, p>0.05<br>- College graduate or higher<br>▪ Law 1: adjusted OR=0.7, p>0.01<br>▪ Law 2: adjusted OR=0.8, p<0.05<br>▪ Law 3: adjusted OR=0.3, p=0.05                                                 |
| [44]; USA and ISL                             | 893   | US adults (ø age:40.9 years; 46.1% female)             | 13 statements assessing support for employment-specific and broader antidiscrimination laws or policies                   | 3 Subgroups<br>- High school or less<br>- some college/technical or vocation degree<br>- College graduate or higher          | Positive        | Tobit Regression<br>- High school or less = reference category<br><br>Broad laws and policies<br>- Vocational training/some college: Coeff= -0.135, p>0.05<br>- College: Coeff = -0.223, p>0.05<br>- Postgraduate: Coeff = -0.040, p>0.05<br><br>Employment-specific laws and policies<br>- Vocational training/some college: Coeff= -0.115, p>0.05<br>- College: Coeff= -0.220, p>0.05<br>- Postgraduate: Coeff.= -0.087, p>0.05 |
|                                               | 658   | ISL adults (ø age:45.9 years; 46.1% female)            |                                                                                                                           |                                                                                                                              |                 | 2 subgroups<br>- High school or less<br>- College                                                                                                                                                                                                                                                                                                                                                                                 |
| [46]; USA                                     | 1,001 | Population-based sample (ø age:43.8 years; 51% female) | 6 statements assessing support for general, employment-specific and broader policies/ antidiscrimination laws or policies | 3 subgroups<br>- High school<br>- college degree<br>- Postgraduate degree                                                    | <b>Positive</b> | Logistic regression, five of six statements<br>- High school = reference category<br>- Higher degree: OR= 0.56-0.72, p<0.05                                                                                                                                                                                                                                                                                                       |

259

|           |       |                                                            |                                                                                                       |                                                                                          |                                                                                 |                                                                                                                                                                                                                                                                            |
|-----------|-------|------------------------------------------------------------|-------------------------------------------------------------------------------------------------------|------------------------------------------------------------------------------------------|---------------------------------------------------------------------------------|----------------------------------------------------------------------------------------------------------------------------------------------------------------------------------------------------------------------------------------------------------------------------|
| [51]; USA | 909   | US adults                                                  | 2 statements assessing support for antidiscrimination policies                                        | Only 2 subgroups reported:<br>- less than High school<br>- College degree                | <b>Positive</b>                                                                 | Probit Model<br>- Less than High school = reference category<br>"Government should do more to protect obese"<br>- College degree: $\beta = -0.100$ , $p < 0.05$<br>"Overweight should get same protections as disabled"<br>- College degree: $\beta = -0.136$ , $p < 0.01$ |
| [48]; GER | 2,531 | Population-based sample (ø age: 48.79 years; 55.5% female) | 6 Statements assessing support of general and employment-specific antidiscrimination laws or policies | 2 subgroups:<br>- Low (<12 years of education)<br>- High ( $\geq 12$ years of education) | General laws<br><b>Positive</b><br>Employment-specific laws:<br><b>Negative</b> | Logistic regression<br>- Education $\geq 12$ years: OR= 0.60, $p = 0.005$<br>Logistic regression<br>- Education $\geq 12$ years: OR= 1.25, $p = 0.016$                                                                                                                     |
| [40]; DNK | 1,003 | Citizens aged 18-65                                        | Attitudes toward weight-loss surgery & medical treatment of obesity                                   | No details reported                                                                      | /                                                                               | /                                                                                                                                                                                                                                                                          |

260 Note: <sup>1</sup> Bold characters display significant association, Positive = demonstrates greater anti-fat attitudes with increasing educational attainment; Negative = demonstrate greater anti-fat attitudes  
 261 with decreasing educational attainment; N = sample size; FPS = Fat Phobia Scale; UMB = Universal Measure of Bias; WCB = Weight Control/Blame of the Anti-Fat Attitudes Test; ATOP =  
 262 Attitudes to Obese People; IAT = Implicit Association Test; PFRS = Photographic Figure Rating Scale; SES = Socioeconomic status

263

Table 2 Summary of Selected Studies: Weight Bias Depending on Level of Income

| Study                                              | N     | Sample Discription                                                           | Instruments Weight bias                 | Level of income                                                                                                                                | Direction of Correlation <sup>1</sup> | Magnitude of Association                                                                                                                                                                                                                                                                                                                                                                                                                                                                                                       |
|----------------------------------------------------|-------|------------------------------------------------------------------------------|-----------------------------------------|------------------------------------------------------------------------------------------------------------------------------------------------|---------------------------------------|--------------------------------------------------------------------------------------------------------------------------------------------------------------------------------------------------------------------------------------------------------------------------------------------------------------------------------------------------------------------------------------------------------------------------------------------------------------------------------------------------------------------------------|
| <b>Form of weight bias: stigmatizing attitudes</b> |       |                                                                              |                                         |                                                                                                                                                |                                       |                                                                                                                                                                                                                                                                                                                                                                                                                                                                                                                                |
| [38]; MEX                                          | 1,100 | Women aged 18-40 of low SES (ø age: 37.5 years)                              | Beliefs about the causes of obesity     | Weekly income, 4 subgroups:<br>- USD < 1,200<br>- USD 1,200-2,000<br>- USD 2,000-4,000<br>- USD ≥ 4,000                                        | Negative                              | Logistic regression<br>- "Having an unhealthy lifestyle: unadjusted OR= 1.13, p>0.05, Confidence Interval 0.78-1.62                                                                                                                                                                                                                                                                                                                                                                                                            |
| [10]; GER                                          | 960   | Population based sample (ø age: 45.9 years; 56.9% female)                    | WCB [2]                                 | Monthly Income, 2 subgroups:<br>- EUR < 2,000<br>- EUR ≥ 2,000                                                                                 | Negative                              | Zero-order association<br>- r= -0.02, p>0.01                                                                                                                                                                                                                                                                                                                                                                                                                                                                                   |
| [37]; SWE                                          | 2,436 | Representative Swedish population aged 25-64 (ø age: 47.8 years; 63% female) | ATOP [4]                                | Annual household income; no subgroups reported                                                                                                 | Positive                              | Pearson and Spearman zero-order correlations:<br>- r=0.018, p= .382                                                                                                                                                                                                                                                                                                                                                                                                                                                            |
| [49]; USA                                          | 1,118 | US adults (ø age:43.8 years; 50.2% female)                                   | Opinions about obesity as a disease [5] | Annual household income, 5 subgroups<br>- USD < 25,000<br>- USD 25,000-49,999<br>- USD 50,000-74,999<br>- USD 75,000-99,999<br>- USD > 100,000 | Mixed                                 | Linear regression<br>- Less than \$25,000 = reference category<br><br>Agreement with statements in support of classification<br>- USD 25,000 - 49,999: β= 0.045, p>0.1<br>- USD 50,000 - 74,999: β= 0.113, p<0.1<br>- USD 75,000 - 99,999: β= 0.084, p>0.1<br>- > USD 100,000: β= -0.026, p>0.1<br><br>Agreement with statements in opposition of classification<br>- USD 25,000 - 49,999: β=0.06, p>0.1<br>- USD 50,000 - 74,999: β=-0.019, p>0.1<br>- USD 75,000 - 99,999: β=0.041, p>0.1<br>- > USD 100,000: β=0.061, p>0.1 |
| [42]; GER                                          | 3003  | population based (ø age:51.7 years; 52.8% female)                            | Short-FPS [1]                           | Monthly household income, 4 subgroups:<br>- EUR < 999<br>- EUR 1,000-1,999<br>- EUR 2,000-2,999<br>- EUR > 3,000                               | /                                     | /                                                                                                                                                                                                                                                                                                                                                                                                                                                                                                                              |

264

|                                                                             |       |                                                                      |                                                                                                                           |                                                                                                                                                     |          |                                                                                                                                                                                                                                                                  |
|-----------------------------------------------------------------------------|-------|----------------------------------------------------------------------|---------------------------------------------------------------------------------------------------------------------------|-----------------------------------------------------------------------------------------------------------------------------------------------------|----------|------------------------------------------------------------------------------------------------------------------------------------------------------------------------------------------------------------------------------------------------------------------|
| [39]; USA                                                                   | 396   | General, not overweight population (ø age: 42.7 years; 43.7% female) | Short-FPS [1]                                                                                                             | Annual household income, 5 subgroups:<br>- USD < 20,000<br>- USD 20,000-39,000<br>- USD 40,000-59,000<br>- USD 60,000-79,000<br>- USD > 80,000      | /        | Correlation:<br>- Unadjusted, correlation coefficient not reported, p= 0.305                                                                                                                                                                                     |
| <b>Form of weight bias: Both, stigmatizing and discriminating attitudes</b> |       |                                                                      |                                                                                                                           |                                                                                                                                                     |          |                                                                                                                                                                                                                                                                  |
| [47]; USA                                                                   | 981   | US representative sample (62% female)                                | Beliefs about obesity as a financial burden for society                                                                   | Annual household income, 4 subgroups:<br>- USD < 25,000<br>- USD 25,000 < 50,000<br>- USD 50,000 < 75,000<br>- USD ≥ 75,000                         | Positive | Logistic regression<br>- USD < 25,000 = reference category<br>- USD 25,000 < 50,000: adjusted OR= 1.02, p>0.05<br>- USD 50,000 < 75,000: adjusted OR= 1.57, p>0.05<br>- USD ≥ 75,000: adjusted OR= 3.18, p<0.001                                                 |
|                                                                             |       |                                                                      | Beliefs about the controllability of obesity                                                                              |                                                                                                                                                     | Negative | Logistic regression<br>- USD < 25,000 = reference category<br>- USD 25,000 < 50,000: adjusted OR= 0.82, p>0.05<br>- USD 50,000 < 75,000: adjusted OR= 0.96, p>0.05<br>- USD ≥ 75,000: adjusted OR= 0.51, p>0.05                                                  |
| <b>Form of weight bias: discriminating attitudes</b>                        |       |                                                                      |                                                                                                                           |                                                                                                                                                     |          |                                                                                                                                                                                                                                                                  |
| [51]; USA                                                                   | 710   | US adults (aged 18 – 65)                                             | 2 statements assessing support for civil protections for the obese                                                        | Annual household income<br>- USD < 15,000<br>- USD > 100,000                                                                                        | Positive | Probit Model<br>- USD < 15,000 = reference category<br>"Government should do more to protect obese"<br>- USD > 100,000: β= -0.098, p<0.01<br>Overweight should get same protections as disabled"<br>- USD > 100,000: β= -0.077, p<0.01                           |
| [48]; GER                                                                   | 2,531 | Population-based sample (ø age: 48.79 years; 55.5% female)           | 6 Statements assessing support of general and employment-specific antidiscrimination laws or policies                     | Monthly Income, 2 subgroups:<br>- EUR < 2,000<br>- EUR ≥ 2,000                                                                                      | Positive | Logistic regression<br>General laws or policies<br>- EUR < 2,000 = reference category<br>- EUR ≥ 2,000: OR=0.67, p=0.002<br>Logistic regression<br>Employment-specific laws or policies<br>- EUR < 2,000 = reference category<br>- EUR ≥ 2,000: OR=0.91, p=0.376 |
| [46]; USA                                                                   | 1,001 | Population based sample (ø age: 43.8 years; 51% female)              | 6 statements assessing support for general, employment-specific and broader policies/ antidiscrimination laws or policies | Annual household income, 5 subgroups<br>- USD 15,000-25,000<br>- USD 25,000-49,999<br>- USD 50,000-74,999<br>- USD 75,000-99,999<br>- USD > 100,000 | Positive | Logistic regression, five of six statements<br>- USD 15,000-25,000 = reference category<br>- Adjusted OR= 0.52-0.64, p<0.05                                                                                                                                      |

265

|           |       |                                         |                                                                                                                |                                                                                                                                                 |                 |                                                                                                                                                                                                                                                                                                                                                                                                                                                                                                               |
|-----------|-------|-----------------------------------------|----------------------------------------------------------------------------------------------------------------|-------------------------------------------------------------------------------------------------------------------------------------------------|-----------------|---------------------------------------------------------------------------------------------------------------------------------------------------------------------------------------------------------------------------------------------------------------------------------------------------------------------------------------------------------------------------------------------------------------------------------------------------------------------------------------------------------------|
| [50]; USA | 1,114 | Adults (ø age: 44.87 years; 48% female) | 6 Statements assessing support of general and employment-specific antidiscrimination laws or policies          | Annual household income, 5 subgroups:<br>- USD < 25,000<br>- USD 25,000-49,999<br>- USD 50,000-74,999<br>- USD 75,000-99,999<br>- USD > 100,000 | <b>Positive</b> | Ordinal logistic regression<br>- USD < 25,000 = reference category<br>- Significant results among women but not men<br>"Obesity should be considered a disability under the ADA to protect obese people from weight discrimination in the workplace"<br>- USD 75,000-99,999: OR= 0.52, p<0.05<br>"Congress should pass the WDEA to protect overweight Americans from discrimination in the workplace"<br>- USD 75,000-99,999: OR= 0.49, p<0.05                                                                |
| [45]; USA | 3,502 | Adults (age 21-65; 61.9% female)        | 3 statements assessing support of legal protection and employment-specific antidiscrimination laws or policies | Annual household income, 5 subgroups<br>- USD < 25,000<br>- USD 25,000-49,999<br>- USD 50,000-74,999<br>- USD 75,000-99,999<br>- USD > 100,000  | Mixed           | Logistic Regression Model<br>- USD 15,000-25,000 = reference category<br>- USD 25,000-49,999<br>- Law 1: OR=1.0, p>0.05)<br>- Law 2: OR=1.2, p>0.05)<br>- Law 3: OR=1.0, p>0.05)<br>- USD 50,000-74,999<br>- Law 1: OR=1.0, p>0.05)<br>- Law 2: OR=1.2, p>0.05)<br>- Law 3: OR=1.0, p>0.05)<br>- USD 75,000-99,999<br>- Law 1: OR=1.2, p>0.05)<br>- Law 2: OR=1.3, p>0.05)<br>- Law 3: OR=0.9, p>0.05)<br>- USD > 100,000<br>- Law 1: OR=0.8, p>0.05)<br>- Law 2: OR=1.0, p>0.05)<br>- Law 3: OR=0.9, p>0.05) |
| [40]; DNK | 1,003 | Citizens (age 18-65)                    | Attitudes toward weight-loss surgery & medical treatment of obesity                                            | No details reported                                                                                                                             | /               | /                                                                                                                                                                                                                                                                                                                                                                                                                                                                                                             |

Note: <sup>1</sup> Bold characters display significant association, Positive = demonstrates greater weight bias with increasing level of income; Negative = show greater weight bias with decreasing level of income; N = sample size

266  
267



## 268 Instruments

269 The studies included were found to be heterogeneous with regard to the instruments  
270 used (Table 3 and 4). Therefore, the study team has decided against a meta-analysis  
271 and for a systematic narrative literature review.

## 272 Educational attainment and level of income

273 Seventeen studies were found that assessed attitudes toward obesity in association  
274 with participants' educational attainment and/or level of income. All of these seventeen  
275 studies reported the participants' educational attainment [10, 36–51]. Depending on  
276 the origin of the sample and the analogous countries' educational system, categories  
277 were formed or years of educational attainment were gathered. From seventeen  
278 studies, thirteen assessed participants' level of income [10, 37–40, 42, 45–51];  
279 therefore, income was either assessed by the annual, weekly, household, or individual  
280 income.

## 281 Weight Bias in Form of Stigmatizing Attitudes

282 Studies that examined either participants' stigmatizing attitudes or participants' beliefs  
283 about the causes of obesity [10, 36, 37, 37–39, 41–43, 47, 49] were included.  
284 Stigmatizing attitudes were thereby measured with instruments such as the Fat Phobia  
285 Scale (FPS), the Universal Measure of Bias (UMB), the Weight Control/Blame of the  
286 Antifat Attitude Test (WCB), the Attitudes to Obese People (ATOP), the Implicit  
287 Association Test (IAT), or the Photographic Figure Rating Scale (PFRS). As described  
288 before, beliefs about the causes of obesity in the form of evaluating obesity as a  
289 controllable condition – which is supposedly preventable by a greater extent of self-  
290 discipline – can consequently be seen as one decisive factor in determining  
291 stigmatizing attitudes [52] and was therefore included. The instruments used are  
292 presented in Table 3.

293 **Table 3 Overview of the instruments used to measure stigmatizing attitudes**

| Instruments measuring Stigmatizing attitudes                                      | Studies that apply the instrument |
|-----------------------------------------------------------------------------------|-----------------------------------|
| <i>Explicit Stigma</i>                                                            |                                   |
| - Fat Phobia Scale (FPS)                                                          | [39, 42, 43]                      |
| - Universal Measure of Bias (UMB)                                                 | [43]                              |
| - Attitudes to Obese People (ATOP)                                                | [36, 37]                          |
| - Opinions about obesity as a disease                                             | [49]                              |
| - Photographic Figure Rating Scale (PFRS)                                         | [41]                              |
| <i>Implicit Stigma</i>                                                            |                                   |
| - Implicit Association Test (IAT)                                                 | [36]                              |
| <i>Causal Attribution</i>                                                         |                                   |
| - Weight Control/Blame of the Anti-Fat-Attitudes (WCB)                            | [10]                              |
| - Potential causes of obesity                                                     | [38]                              |
| - Individuals responsibility ("Obese people can do something about their weight") | [47]                              |

294

295 Weight Bias in the form of Discriminating Attitudes

296 We found eight studies that investigated participants' discriminating attitudes toward  
 297 people with obesity [40, 44–48, 50, 51]. All instruments used to measure discriminating  
 298 attitudes are listed in Table 4. Discrimination was measured for example, by examining  
 299 policy and law support, but also the ratings on the statement "Obesity is a major burden  
 300 to society in terms of healthcare costs" as well as attitudes toward weight-loss surgery  
 301 and medical treatment. We found some studies [44–46, 48, 50, 51] that investigated  
 302 support for the same or almost identical laws or policies (Law/policy a-i). However,  
 303 these items were analyzed in such heterogeneous way, for example, by merging  
 304 different items into one, that a meta-analysis could not be conducted.

305 **Table 4 Overview of the instruments used to measure discriminating attitudes**

| Instrument measuring discriminating attitudes                                                                                                                                                                                                   | Studies that apply the instrument |
|-------------------------------------------------------------------------------------------------------------------------------------------------------------------------------------------------------------------------------------------------|-----------------------------------|
| <i>Attitudes toward weight-loss surgery &amp; medical treatment</i>                                                                                                                                                                             | [40]                              |
| <i>Beliefs about obesity as a financial burden for society</i>                                                                                                                                                                                  | [47]                              |
| <i>Statements measuring support/rejection of weight-related laws or policies</i>                                                                                                                                                                |                                   |
| <sup>a</sup> My country/state should include body weight in our civil rights law in order to protect people from discrimination based on their body weight                                                                                      | [44–46, 48, 50]                   |
| <sup>b</sup> It should be illegal for an employer to refuse to hire a qualified person because of his or her body weight.                                                                                                                       | [44–46, 48, 50]                   |
| <sup>c</sup> It should be illegal for an employer to terminate or fire a qualified employee because of his or her body weight.                                                                                                                  | [44–46, 48, 50]                   |
| <sup>d</sup> Fat/overweight persons should be subject to the same legal protections and benefits offered to people with physical disabilities.                                                                                                  | [44–46, 48, 50, 51]               |
| <sup>e</sup> It should be illegal for an employer to deny a promotion or appropriate compensation to a qualified employee because of his or her body weight.                                                                                    | [44–46, 50]                       |
| <sup>f</sup> Obesity should be considered a disability (under the ADA) so that people will be protected from weight discrimination in the workplace                                                                                             | [44, 46, 48, 50]                  |
| <sup>g</sup> Congress/Government should pass the Weight Discrimination in Employment Act (WDEA) to protect overweight Americans from discrimination in the workplace/employees from discrimination in the workplace based on their body-weight. | [44, 46, 50]                      |
| <sup>h</sup> The government should play a more active role in protecting overweight people from discrimination.                                                                                                                                 | [46, 50, 51]                      |
| <sup>i</sup> It should be illegal for an employer to assign lower wages to a qualified employee because of his or her body weight.                                                                                                              | [44, 48]                          |
| <sup>j</sup> The government should have specific laws in place to protect people from weight discrimination.                                                                                                                                    | [44]                              |
| <sup>k</sup> The government should penalize (or fine) those who discriminate against persons because of their weight.                                                                                                                           | [44]                              |
| <sup>l</sup> Individual companies should have the right to determine whom to hire based on an employee's personal body weight.                                                                                                                  | [44]                              |
| <sup>m</sup> Employers should be allowed to assign different salaries to employees based on their body weight.                                                                                                                                  | [44]                              |
| <sup>n</sup> My country should pass a Healthy Workplace Law to address workplace bullying                                                                                                                                                       | [44]                              |

306

307 **Findings**

308 The studies included showed a very heterogeneous picture regarding their results.  
 309 Eleven out of the seventeen studies significantly associated educational attainment  
 310 (Table 5) and/or level of income (Table 6) with stigmatizing and/or discriminatory  
 311 attitudes toward people with obesity [10, 38, 42–48, 50, 51].

### 312 Associations between educational attainment and weight-related stigmatization

313 We found ten studies that reported an association between educational attainment and  
314 stigmatizing attitudes, whereas only two of them [38, 43] showed a positive association  
315 between higher educational attainment and weight-related stigmatization. In addition,  
316 the study of Puhl and colleagues [43, 44] found a significant association in the Icelandic  
317 (Beta=0.160,  $p<0.05$ ), but not in the American sample. However, two German studies  
318 [10, 42] showed an inverse correlation. Both of these studies found evidence that  
319 higher education is associated with lower stigma [42] and less belief in individual  
320 responsibility [10] for an obese condition. The remaining studies did not report  
321 significant associations.

### 322 Associations between educational attainment and weight-related discrimination

323 Six studies [44–47, 50, 51] reported increased discriminating attitudes with higher  
324 education. The study of Puhl and colleagues found no significant association between  
325 weight bias and educational attainment in the US sample, but did find an association  
326 in the Icelandic sample (Beta = -0.221,  $p<0.01$ ). The study of Hilbert and colleagues  
327 [48] revealed inconsistent findings: Higher education is associated with less support  
328 for general but more support for employment specific weight-related antidiscrimination  
329 laws or policies.

### 330 Associations between the level of income and weight-related stigmatization

331 We found no study that reported a significant association between the level of income  
332 and weight-related stigmatization. Associations between the level of income and  
333 weight-related discrimination

334 Four American [46, 47, 50, 51] revealed stronger weight-related discrimination with  
335 increasing income. One German study [48] found less support for general, but not for  
336 employment specific policies and laws among more affluent people. Although the study  
337 of Suh et al. [45] found a significant positive association between level of income and  
338 support for two laws and policies (law a:  $\chi^2=6.06$ ,  $p=0.01$ ; law d:  $\chi^2=3.81$ ,  $p=0.05$ ),  
339 these results could not be validated by logistic regression analysis. Moreover, the  
340 assumption that discrimination, in the form of views on the funding for medical or  
341 weight-loss surgery, is somehow associated with income was not found [40].

1  
2  
3  
4  
5  
6  
7  
8  
9  
10  
11  
12  
13  
14  
15  
16  
17  
18  
19  
20  
21  
22  
23  
24  
25  
26  
27  
28  
29  
30  
31  
32  
33  
34  
35  
36  
37  
38  
39  
40  
41  
42  
43  
44  
45  
46

For peer review only

342 Table 5. Studies That Show Significant Associations Between Education Attainment and Weight-Related Stigmatization and Discrimination

| Study | Direction of correlation | Form of Weight Bias | Instrument Weight Bias                                                          | Result                                                                                                                                                        | Adjusted for                                                                                                                                                                          |
|-------|--------------------------|---------------------|---------------------------------------------------------------------------------|---------------------------------------------------------------------------------------------------------------------------------------------------------------|---------------------------------------------------------------------------------------------------------------------------------------------------------------------------------------|
| [42]  | Negative                 | Stigmatization      | Short-FPS                                                                       | Higher educational attainment is associated with lower stigmatizing attitudes                                                                                 | Gender, age, income, residence, emigrational background                                                                                                                               |
| [10]  | Negative                 | Stigmatization      | WCB                                                                             | Higher educational attainment is associated with less stigmatizing attitudes (P<0.001)                                                                        | Causal attributions to behavior, Labeling obesity as an illness, Age, Causal attributions to heredity                                                                                 |
| [43]  | Positive                 | Stigmatization      | UMB-Fat                                                                         | Higher educational attainment is associated with higher stigmatizing attitudes (ISL sample; P<0.05)                                                           | Gender, race/ethnicity, BMI, perceived causes of obesity, weight-related attributions                                                                                                 |
| [38]  | Positive                 | Stigmatization      | Beliefs about the causes of obesity                                             | Higher educational attainment is associated with greater belief in individual responsibility (P<0.001)                                                        | Unadjusted                                                                                                                                                                            |
| [47]  | Positive                 | Discrimination      | Belief in obesity as a financial burden for society                             | Higher educational attainment is associated with greater belief in the statement "Obesity is a major burden to society in terms of healthcare costs" (P<0.01) | Race/ethnicity, sex, income, employment, age group, marital status, BMI, smoking status                                                                                               |
| [45]  | Positive                 | Discrimination      | Support for weight-related laws or policies                                     | Higher educational attainment is associated with lower support for weight-related laws or policies (P<0.01)                                                   | Other socio-demographic variables                                                                                                                                                     |
| [44]  | Positive                 | Discrimination      | Support for weight-related laws or policies                                     | Higher educational attainment is associated with less support for weight-related laws or policies (P<0.01)                                                    | Sex, age, race/ethnicity, BMI                                                                                                                                                         |
| [46]  | Positive                 | Discrimination      | Support for weight-related laws or policies                                     | Higher educational attainment is associated with lower support for weight-related laws or policies                                                            | Sex, body weight, age, income, race, political affiliation, history of weight-based victimization                                                                                     |
| [51]  | Positive                 | Discrimination      | Support for civil protections for the obese                                     | Higher educational attainment is associated with lower support for civil protection of the obese                                                              | Sex, age, BMI, race/ethnicity, income, political orientation, perceived causes for obesity                                                                                            |
| [50]  | Positive                 | Discrimination      | Support for general and employment specific antidiscrimination laws or policies | Higher educational attainment is associated with less support for weight-related laws or policies                                                             | Body weight, age, race, political affiliation, income, history of weight-based discrimination, divergent vignettes describing obesity and obesity-related (workplace) discriminations |
| [48]  | Positive                 | Discrimination      | Support for general antidiscrimination laws or policies                         | Higher educational attainment is associated with less support for general antidiscrimination laws or policies                                                 | Sex, age, weights status, income, residence, church membership, readiness to vote in following week, weight-based victimization, weight bias internalization                          |
|       | Negative                 |                     | Support for employment-specific antidiscrimination laws or policies             | Higher educational attainment is associated with stronger support for employment specific antidiscrimination laws or policies                                 |                                                                                                                                                                                       |

Positive = demonstrates greater weight bias with increasing educational attainment; Negative = show greater weight bias with decreasing educational attainment

343 Table 6 Studies That Show Significant Associations Between Level of Income and Weight-Related Stigmatization and Discrimination

| Study | Direction of correlation | Form of Weight Bias | Instrument Weight Bias                                                          | Result                                                                                                                                                 | Adjusted for                                                                                                                                                                             |
|-------|--------------------------|---------------------|---------------------------------------------------------------------------------|--------------------------------------------------------------------------------------------------------------------------------------------------------|------------------------------------------------------------------------------------------------------------------------------------------------------------------------------------------|
| [47]  | Positive                 | Discrimination      | Belief in obesity as a burden for society                                       | Yes; A higher income level is associated with greater belief in statement "Obesity is a major burden to society in terms of healthcare costs" (P<0.05) | Race/ethnicity, sex, education, employment, age group, marital status, BMI, smoking status                                                                                               |
| [46]  | Positive                 | Discrimination      | Support for weight-related laws or policies                                     | Higher income is associated with lower support for weight-related laws or policies                                                                     | Sex, body weight, age, education, income, race, political affiliation, history of weight-based victimization                                                                             |
| [51]  | Positive                 | Discrimination      | Support for civil protections for the obese                                     | Higher income is associated with lower support for civil protection of the obese                                                                       | Sex, age, BMI, race/ethnicity, education, political orientation, perceived causes for obesity                                                                                            |
| [50]  | Positive                 | Discrimination      | Support for general and employment specific antidiscrimination laws or policies | Higher income is associated with less support for weight-related laws or policies                                                                      | Body weight, age, race, political affiliation, education, history of weight-based discrimination, divergent vignettes describing obesity and obesity-related (workplace) discriminations |
| [48]  | Positive                 | Discrimination      | Support for general antidiscrimination laws or policies                         | Higher income is associated with less support for general antidiscrimination laws or policies                                                          | Sex, age, weights status, education, residence, church membership, readiness to vote in following week, weight-based victimization, weight bias internalization                          |

Positive = demonstrates greater weight bias with increasing level of income; Negative = show greater weight bias with decreasing level of income

For peer review only

## 345 Discussion

346 This systematic literature review aimed to summarize the current state of research on  
347 socioeconomic status and its impact on weight-related stigmatization and  
348 discrimination. As it was outlined earlier, the association between socioeconomic  
349 factors and weight bias has not been investigated sufficiently [50]. This review aimed  
350 therefore to address this gap. Although many studies were found that investigated  
351 various forms of weight bias and assessed socioeconomic data, an association was  
352 only reported in 17 studies. The underlying reason why an association was not reported  
353 might be a different research focus, but also insignificant findings. Overall, eleven out  
354 of the seventeen studies showed that weight bias is significantly associated with either  
355 educational attainment or level of income. In the following the results are discussed  
356 separated by education and income, as well as weight-related stigmatization and  
357 discrimination.

### 358 Educational Attainment, Level of Income, and Stigmatizing Attitudes

359 Overall, ten studies reported an association between educational attainment and  
360 stigmatizing attitudes. However, we found no systematic pattern in which way  
361 educational attainment and stigmatizing attitudes are associated: Two studies [38, 43]  
362 supported the hypothesis that stigmatizing attitudes are more likely in people with  
363 higher educational attainment, whereas two German studies [10, 42] contradict this.  
364 Moreover, six studies [36, 37, 39, 41, 47, 49] did not show any significant association,  
365 nor a clear direction of the assumed association. In light of divergent results of studies  
366 that report a significant association between socioeconomic variables and stigmatizing  
367 attitudes, the findings must be discussed with regard to their cultural context: American,  
368 Mexican, and Icelandic studies were found to support the working hypothesis, whereas  
369 two German studies [10, 42] revealed findings to the contrary.

370 These differences might be explained when considering cultural distinctions. In  
371 cultures, in which individual responsibility is considered as one of the leading causes  
372 of self-fulfillment, health, and wealth, obesity might be perceived as a self-inflicted  
373 condition. Highly educated people might attempt to keep people down to maintain their  
374 high(er) social status. In contrast, in cultures in which individuals' situations are  
375 principally considered as a result of various circumstances, obesity might consequently



1  
2  
3 376 not only be seen as self-inflicted. In these cultures, especially highly educated people  
4 377 might be aware of social barriers as determinants for self-fulfillment, wealth, and health,  
5 378 i.e., body weight. In conclusion, the direction of the relationship between weight bias  
6 379 and socioeconomic status might depend on divergent socio-cultural perspectives.  
7 380 Hence, future research should consider expansion and reorientation of stigma's  
8 381 theoretical framework by focusing on the meso and macro socio-cultural structures, as  
9 382 Bonnington and Rose [53] suggest.

10 383  
11 384 Overall, we found eight studies that investigated (or rather reported) the association  
12 385 between level of income and stigmatizing attitudes. None of these studies showed a  
13 386 significant relationship. However, the direction of the (insignificant) associations did not  
14 387 show any pattern. We found three studies reporting an (insignificant) positive  
15 388 association [10, 38, 47], and one study each reporting an (insignificant) positive [37] or  
16 389 mixed associations [49].

#### 27 390 Educational Attainment, Level of Income, and Discriminating Attitudes

28 391 Of the seventeen studies included, eight studies were found that reported an  
29 392 association between educational attainment and discriminating attitudes. Five of these  
30 393 studies reported a positive relationship, i.e., stronger discriminating attitudes (in the  
31 394 form of law and policy support) with increasing education. Another study [44] that  
32 395 applied the same instruments for an American and an Icelandic sample found only  
33 396 indications for our assumption (i.e., higher education is associated with stronger  
34 397 discriminating attitudes) in the Icelandic, but not in the American sample. This study  
35 398 [44] was also replicated by Hilbert et al. [48], who report heterogeneous findings as  
36 399 they found less support for general antidiscrimination laws with increasing level of  
37 400 education, but stronger support for employment specific laws and policies among the  
38 401 higher educated German sample. It should, therefore, be discussed whether general  
39 402 and employment specific antidiscrimination policies and laws can be viewed as similar  
40 403 outcomes or if they display different dimensions of discrimination. Moreover, views on  
41 404 who should pay for medical treatment or weight-loss surgery did not reveal significant  
42 405 associations [40]. Only one study [40] did not found a significant association between  
43 406 educational attainment and discriminating attitudes, nor did it report the direction of the  
44 407 insignificant association.

1  
2  
3 408 With regard to the association between level of income and discriminating attitudes we  
4  
5 409 found overall seven studies in which an association was reported. Five studies [46–48,  
6  
7 410 50, 51] reported positive relationships, i.e., stronger discriminating attitudes with an  
8  
9 411 increasing level of income. Suh et al. [45] found a significant association of stronger  
10  
11 412 support for weight-related laws with decreasing income until they controlled for other  
12  
13 413 sociodemographic variables, such as educational attainment. They reported mixed  
14  
15 414 (insignificant) results concerning the direction of the assumed association. A possible  
16  
17 415 explanation for these insignificant results after controlling for education might be that  
18  
19 416 income can be seen as a proxy variable for education, in the way that the level of  
20  
21 417 income depends on educational attainment. Again, Lund and colleagues [40] who  
22  
23 418 asked Danish citizen by whom medical treatment and weight-loss surgery should be  
24  
25 419 funded, found no significant association, nor did they report a direction of the  
26  
27 420 association.

28  
29 421 These findings support our assumption that higher socioeconomic status is associated  
30  
31 422 with stronger discriminating attitudes. However, one German study [48] reported  
32  
33 423 contradicting results that might be ascribed at a macro level to Bourdieu's theory about  
34  
35 424 how cultural frameworks determine how specific values and characteristics are  
36  
37 425 perceived. Governmental structures might enforce stigmatizing and discriminating  
38  
39 426 attitudes as an instrument to 'nudge people into desired patterns of behavior' [29]. It  
40  
41 427 can be assumed that cultural frameworks shape governmental systems and are  
42  
43 428 strengthened at the same time through them, especially through the national health  
44  
45 429 and welfare systems. Tyler and Slater [29], for example, outline the political and social  
46  
47 430 function of stigma as a form of power. They discuss macro-level structures, particularly  
48  
49 431 those used actively and passively by governments, as determinants shaping  
50  
51 432 stigmatizing and discriminating attitudes, a level of understanding often left out in social  
52  
53 433 psychology. As explained above, it might be possible that in countries in which obesity  
54  
55 434 is merely perceived as self-inflicted, discriminating attitudes might be stronger - Hence,  
56  
57 435 stigma is not only an instrument used by individuals to enforce personal interests but  
58  
59 436 also one put in place (intended or not) by governments.  
60

1  
2  
3 437 The different and to some extent inconclusive results might be caused by diverging  
4 438 study designs, sample sizes, and instruments assessing weight-related stigmatization  
5 439 and discrimination, educational attainment, and level of income: Studies that did not  
6 440 show a significant association between weight bias and either educational attainment  
7 441 or level of income excluded the overweight portion of the sample [39] or were  
8 442 characterized by a small sample (ranging from n=198 to n=396) size [36, 39, 41].  
9 443 Furthermore, the association between weight bias with either educational attainment  
10 444 or level of income were not seen in instruments such as the Attitudes to Obese People  
11 445 scale (ATOP) [36, 37], the Implicit Association Test (IAT) [36] agreement ratings as to  
12 446 whether obesity can be classified as a disease [49], and measurement of attitudes  
13 447 toward weight-loss surgery and medical treatment [40].  
14  
15  
16  
17  
18  
19  
20  
21  
22  
23

24 449 However, there are findings diminishing this line of argument: The study of Hilbert et  
25 450 al. [48] found less support for general, but stronger support for employment specific  
26 451 laws with increasing socioeconomic status. In addition, the German population was  
27 452 found to be less supportive of laws and policies that would impede to refuse to hire,  
28 453 assign lower wages, and to fire qualified persons because of their body weight,  
29 454 compared to an American and Icelandic sample [44]. Moreover, the German  
30 455 population was less supportive of including body weight in the civil rights of law  
31 456 compared to the American, but not the Icelandic sample.  
32  
33  
34  
35  
36  
37  
38

39 457 A final point of discussion might be whether the prevalence of obesity has an impact  
40 458 on the magnitude of weight bias. When comparing the prevalence and the  
41 459 stigmatization of obesity between the USA and Germany, for example, the following  
42 460 can be stated: In both countries, the prevalence of obesity increased over time (1995,  
43 461 USA 21.9%; GER 14.5%; 2005 USA 29%; GER 18%) [54]. However, not only the  
44 462 prevalence of obesity itself increased, but also the (perceived) stigmatization toward  
45 463 people with obesity in the US but also in Germany [7, 8, 10, 55].  
46  
47  
48  
49  
50  
51  
52  
53  
54  
55  
56  
57  
58  
59  
60

1  
2  
3 464 Limitations  
4

5 465 Just as any overview must contend with heterogeneous samples and instruments, this  
6 466 systematic review has likewise attempted to cope with varying data. The studies  
7 467 reviewed differed with respect to the instruments used to assess education and  
8 468 income. In particular, the measurement of educational attainment was strongly  
9 469 influenced by the different organization and structure of the varied local educational  
10 470 systems. In addition, the instruments to assess weight bias were also heterogeneous,  
11 471 particularly those used to measure stigmatizing attitudes. Some studies used validated  
12 472 scales, whereas other studies used single items only. Thus, the manner of gathering  
13 473 data and classifying categories can be described as heterogeneous itself – and  
14 474 therefore caused the study team to decide against a meta-analysis. However, studies  
15 475 that did use the same instrument, such as items weighing support for specific laws and  
16 476 policies differed with regard to how they were analyzed (as single items or as an item  
17 477 battery). Therefore, the authors had to decide again against a meta-analysis and  
18 478 applied a vote-counting approach despite its shortcomings.

19 479 Moreover, the study aimed to investigate socioeconomic determinants of weight bias  
20 480 in the general population, as discussed in the inclusion and exclusion section.  
21 481 Therefore, we excluded, among other things, studies that focused on overweight  
22 482 and/or obese samples only. We assumed that people try to differentiate themselves  
23 483 from lower status groups, which might be characterized by varying body sizes, i.e.,  
24 484 excess weight or obesity. However, overweight and obese samples were included as  
25 485 part of the general population in some studies. Also, these studies did not differentiate  
26 486 their results by participants' body sizes. We also excluded studies based on  
27 487 homogenous samples, such as health care professionals and students. We considered  
28 488 these studies as inadequate since there would have been no possibility to compare  
29 489 and thus interpret these results with regard to the research question. Moreover,  
30 490 stigmatizing attitudes among some professions, such as dietitians and nutritionists,  
31 491 were already investigated systematically.

32 492 In the general population, we assume that people try to differentiate themselves not  
33 493 only by socioeconomic status but by other status markers as well, such as excess  
34 494 weight. Although we attempted to explain the heterogeneous and inconclusive results  
35  
36  
37  
38  
39  
40  
41  
42  
43  
44  
45  
46  
47  
48  
49  
50  
51  
52  
53  
54  
55  
56  
57  
58  
59  
60

1  
2  
3 495 by appealing to governmental and cultural differences, there was insufficient (and also  
4 496 inconclusive) evidence to conclude the role of cultural and governmental structures on  
5 497 weight bias.

8  
9 498 Since the study team has only sufficient language skills in English and German, the  
10 499 current research includes only papers written in English or German

## 13 500 **Conclusion**

15 501 The literature review aimed to investigate to what extent weight bias can be traced  
16 502 back to socioeconomic variables, such as educational attainment and level of income.  
17 503 We assumed that a higher level of education or income is associated with greater  
18 504 stigmatization and discrimination. Therefore, the current study situation was analyzed  
19 505 systematically. Although data of education and income are always collected as  
20 506 mandatory sociodemographic information, research is lacking when it comes to  
21 507 examining their impact on weight bias. Since this question has not yet been answered  
22 508 sufficiently, this review was supposed to address this gap in research and aimed to  
23 509 contribute to closing this gap.

30 510  
32 511 Our working hypothesis that weight bias increases with higher educational attainment  
33 512 or level of income could not be verified. Particularly, we found eight studies that  
34 513 supported our hypothesis, two German studies indicating the reverse conclusion, one  
35 514 German study reported heterogenous findings and seven studies that did not show a  
36 515 significant association at all.

41 516  
43 517 The key to identifying effective interventions to battle stigmatization, discrimination,  
44 518 and consequences for those affected might lie in exposing the characteristics of  
45 519 stigmatizing groups and their motivations. Therefore, future research should pay more  
46 520 attention to the link between weight bias and socioeconomic factors and cultural or  
47 521 rather governmental structures. Moreover, meta-analysis should be considered as an  
48 522 important direction for future research.

1  
2  
3 **523 Figure legends**

4  
5 524 Figure 1. Phases of the systematic review  
6  
7

8 **525 Supplementary Material**

9 526 Supplementary Table 1. Risk of Bias Assessment  
10  
11

12 **527 Funding Sources**

13  
14 528 This study was supported by the Federal Ministry of Education and Research (BMBF),  
15 529 Germany, FKZ: 01EO1501. The funding source had no involvement in study design,  
16 530 collection, analysis, and interpretation of data. Furthermore, we acknowledge support  
17 531 from the German Research Foundation (DFG) and University Leipzig within the  
18 532 program of Open Access Publishing.  
19  
20  
21  
22

23  
24 **533 Disclosure Statement**

25 534 The authors have no conflicts of interest to declare.  
26  
27

28 **535 Author contributions**

29  
30 536 MB, CLS, and SRH outlined and specified the research question. MB and CLS  
31 537 conducted the systematic search of the literature. Furthermore, MB, CLS, and TF  
32 538 discussed papers in detail in case of disagreement and uncertainty over the eligibility  
33 539 of abstracts. MB wrote the first draft of the manuscript. TF, SRH, and CLS revised it  
34 540 critically for valuable intellectual content. All authors contributed to and have approved  
35 541 the final manuscript.  
36  
37  
38  
39  
40

41 542

42  
43 **543 Data sharing statement**

44 544 No unpublished data is available following this study.  
45  
46  
47  
48  
49  
50  
51  
52  
53  
54  
55  
56  
57  
58  
59  
60

545

546 **REFERENCES**

- 547 1 World Health Organization. Obesity and overweight 2018. Available at:  
 548 <http://www.who.int/en/news-room/fact-sheets/detail/obesity-and-overweight> Accessed  
 549 August 27, 2018.
- 550 2 Mensink G, Schienkiewitz A, Scheidt-Nave C. Overweight and obesity in Germany: Results of the  
 551 German Health Interview and Examination Survey for Adults. *Bundesgesundheitsblatt -*  
 552 *Gesundheitsforschung - Gesundheitsschutz* 2013;786–94.
- 553 3 Flegal KM, Kruszon-Moran D, Carroll MD, et al. Trends in Obesity Among Adults in the United  
 554 States, 2005 to 2014. *JAMA* 2016;315(21):2284–91.
- 555 4 Pi-Sunyer X. The medical risks of obesity. *Postgrad Med* 2009;121(6):21–33.
- 556 5 Jung FUCE, Luck-Sikorski C, Wiemers N, et al. Dietitians and Nutritionists: Stigma in the Context  
 557 of Obesity. A Systematic Review. *PLoS One* 2015;10(10):e0140276.
- 558 6 Puhl RM, Heuer CA. The stigma of obesity: a review and update. *Obesity (Silver Spring)*  
 559 2009;17(5):941–64.
- 560 7 Andreyeva T, Puhl RM, Brownell KD. Changes in perceived weight discrimination among  
 561 Americans, 1995-1996 through 2004-2006. *Obesity (Silver Spring)* 2008;16(5):1129–34.
- 562 8 Spahlholz J, Baer N, König H-H, et al. Obesity and discrimination - a systematic review and meta-  
 563 analysis of observational studies. *Obes Rev* 2016;17(1):43–55.
- 564 9 Puhl RM, Andreyeva T, Brownell KD. Perceptions of weight discrimination: prevalence and  
 565 comparison to race and gender discrimination in America. *Int J Obes (Lond)* 2008;32(6):992–  
 566 1000.
- 567 10 Hilbert A, Rief W, Braehler E. Stigmatizing attitudes toward obesity in a representative  
 568 population-based sample. *Obesity (Silver Spring)* 2008;16(7):1529–34.
- 569 11 Rand CS, Wright BA. Continuity and change in the evaluation of ideal and acceptable body sizes  
 570 across a wide age span. *Int J Eat Disord* 2000;28(1):90–100.
- 571 12 Schwartz MB, Chambliss HO, Brownell KD, et al. Weight bias among health professionals  
 572 specializing in obesity. *Obes Res* 2003;11(9):1033–39.
- 573 13 Crandall CS. Prejudice against fat people: ideology and self-interest. *J Pers Soc Psychol*  
 574 1994;66(5):882–94.
- 575 14 Puhl RM, Schwartz MB, Brownell KD. Impact of perceived consensus on stereotypes about obese  
 576 people: a new approach for reducing bias. *Health Psychol* 2005;24(5):517–25.
- 577 15 Latner JD, Stunkard AJ, Wilson GT. Stigmatized students: age, sex, and ethnicity effects in the  
 578 stigmatization of obesity. *Obes Res* 2005;13(7):1226–31.
- 579 16 Perez-Lopez MS, Lewis RJ, Cash TF. The Relationship of Antifat Attitudes to Other Prejudicial and  
 580 Gender-Related Attitudes1. *J Appl Social Psychol* 2001;31(4):683–97.
- 581 17 Link BG, Phelan J. Stigma power. *Soc Sci Med* 2014;103:24–32.
- 582 18 McLaren L. Socioeconomic status and obesity. *Epidemiol Rev* 2007;29:29–48.
- 583 19 Brewis AA, McGarvey ST, Jones J, et al. Perceptions of body size in Pacific Islanders. *Int J Obes*  
 584 1998;22(2):185–89.
- 585 20 Brewis AA, Wutich A, Falletta-Cowden A, et al. Body Norms and Fat Stigma in Global Perspective.  
 586 *Current Anthropology* 2011;52(2):269–76.

- 1  
2  
3 587 21 Flint SW, Cadek M, Codreanu SC, et al. Obesity Discrimination in the Recruitment Process: "You're  
4 588 Not Hired!". *Front Psychol* 2016;7:647.
- 5 589 22 Agerstrom J, Rooth D-O. The role of automatic obesity stereotypes in real hiring discrimination.  
6 590 *J Appl Psychol* 2011;96(4):790–805.
- 7 591 23 Puhl R, Brownell KD. Bias, discrimination, and obesity. *Obes Res* 2001;9(12):788–805.
- 8 592 24 Flaskerud JH, DeLilly CR. Social determinants of health status. *Issues Ment Health Nurs*  
9 593 2012;33(7):494–97.
- 10 594 25 Bourdieu P. *Distinction: A social critique of the judgement of taste*, 1984th edn. Cambridge,  
11 595 Mass.: Harvard University Press 2000.
- 12 596 26 Cockerham WC. Health lifestyle theory and the convergence of agency and structure. *Journal of*  
13 597 *Health and Social Behavior* 2005;46(1):51–67.
- 14 598 27 Bourdieu P. What Makes a Social Class? On The Theoretical and Practical Existence Of Groups.  
15 599 *Berkeley Journal of Sociology* 1987;32:1–17.
- 16 600 28 Phelan JC, Link BG, Dovidio JF. Stigma and prejudice: one animal or two? *Soc Sci Med*  
17 601 2008;67(3):358–67.
- 18 602 29 Tyler I, Slater T. Rethinking the sociology of stigma. *The Sociological Review* 2018;66(4):721–43.
- 19 603 30 Moher D, Liberati A, Tetzlaff J, et al. Preferred reporting items for systematic reviews and meta-  
20 604 analyses: the PRISMA statement. *BMJ* 2009;339:b2535.
- 21 605 31 Howard C. Subject & Course Guides: Evidence Based Medicine: PICO. Available at:  
22 606 <https://researchguides.uic.edu/c.php?g=252338&p=3954402>. Accessed August 14, 2019.
- 23 607 32 Puhl RM, Latner JD. Stigma, obesity, and the health of the nation's children. *Psychological Bulletin*  
24 608 2007;133(4):557–80.
- 25 609 33 Woolford SJ, Clark SJ, Butchart A, et al. To pay or not to pay: public perception regarding  
26 610 insurance coverage of obesity treatment. *Obesity (Silver Spring)* 2013;21(12):E709-14.
- 27 611 34 Biener A, Cawley J, Meyerhoefer C. The High and Rising Costs of Obesity to the US Health Care  
28 612 System. *J Gen Intern Med* 2017;32(Suppl 1):6–8.
- 29 613 35 Downes MJ, Brennan ML, Williams HC, et al. Development of a critical appraisal tool to assess  
30 614 the quality of cross-sectional studies (AXIS). *BMJ open* 2016;6(12):e011458.
- 31 615 36 Brewis AA, Wutich A. Explicit versus implicit fat-stigma. *Am J Hum Biol* 2012;24(3):332–38.
- 32 616 37 Hansson LM, Rasmussen F. Attitudes towards obesity in the Swedish general population: the role  
33 617 of one's own body size, weight satisfaction, and controllability beliefs about obesity. *Body Image*  
34 618 2014;11(1):43–50.
- 35 619 38 Jimenez-Cruz A, Escobar-Aznar YM de, Castillo-Ruiz O, et al. Beliefs about causes and  
36 620 consequences of obesity among women in two Mexican cities. *J Health Popul Nutr*  
37 621 2012;30(3):311–16.
- 38 622 39 Lippa NC, Sanderson SC. Impact of information about obesity genomics on the stigmatization of  
39 623 overweight individuals: an experimental study. *Obesity (Silver Spring)* 2012;20(12):2367–76.
- 40 624 40 Lund TB, Nielsen MEJ, Sandoe P. In a class of their own: the Danish public considers obesity less  
41 625 deserving of treatment compared with smoking-related diseases. *Eur J Clin Nutr* 2015;69(4):514–  
42 626 18.
- 43 627 41 Swami V, Monk R. Weight bias against women in a university acceptance scenario. *J Gen Psychol*  
44 628 2013;140(1):45–56.
- 45  
46  
47  
48  
49  
50  
51  
52  
53  
54  
55  
56  
57  
58  
59  
60



- 1  
2  
3 629 42 Sikorski C, Luppá M, Brahler E, et al. Obese children, adults and senior citizens in the eyes of the  
4 630 general public: results of a representative study on stigma and causation of obesity. *PLoS One*  
5 631 2012;7(10):e46924.  
6  
7 632 43 Puhl RM, Latner JD, O'Brien K, et al. A multinational examination of weight bias: predictors of  
8 633 anti-fat attitudes across four countries. *Int J Obes (Lond)* 2015;39(7):1166–73.  
9  
10 634 44 Puhl RM, Latner JD, O'Brien KS, et al. Potential Policies and Laws to Prohibit Weight  
11 635 Discrimination: Public Views from 4 Countries. *Milbank Q* 2015;93(4):691–731.  
12 636 45 Suh Y, Puhl R, Liu S, et al. Support for laws to prohibit weight discrimination in the United States:  
13 637 public attitudes from 2011 to 2013. *Obesity (Silver Spring)* 2014;22(8):1872–79.  
14  
15 638 46 Puhl RM, Heuer CA. Public opinion about laws to prohibit weight discrimination in the United  
16 639 States. *Obesity (Silver Spring)* 2011;19(1):74–82.  
17 640 47 Seo D-C, Torabi MR. Racial/ethnic differences in body mass index, morbidity and attitudes toward  
18 641 obesity among U.S. adults. *J Natl Med Assoc* 2006;98(8):1300–08.  
19  
20 642 48 Hilbert A, Hübner C, Schmutzer G, et al. Public Support for Weight-Related Antidiscrimination  
21 643 Laws and Policies. *Obes Facts* 2017;10(2):101–11.  
22 644 49 Puhl RM, Liu S. A national survey of public views about the classification of obesity as a disease.  
23 645 *Obesity (Silver Spring)* 2015;23(6):1288–95.  
24  
25 646 50 Puhl RM, Heuer C, Sarda V. Framing messages about weight discrimination: impact on public  
26 647 support for legislation. *Int J Obes (Lond)* 2011;35(6):863–72.  
27  
28 648 51 Oliver JE, Lee T. Public Opinion and the Politics of Obesity in America. *Journal of Health Politics,*  
29 649 *Policy and Law* 2005;30(5):923–54.  
30 650 52 Gorman MJ, Butsch WS, Reilly-Harrington NA, et al. Stigma In Persons with Obesity. In: Parekh R,  
31 651 Childs EW, eds. *Stigma and Prejudice: Touchstones in Understanding Diversity in Healthcare.*  
32 652 Cham: Springer International Publishing 2016:23–40.  
33  
34 653 53 Bonnington O, Rose D. Exploring stigmatisation among people diagnosed with either bipolar  
35 654 disorder or borderline personality disorder: A critical realist analysis. *Soc Sci Med* 2014;123:7–17.  
36  
37 655 54 World Health Organization. Overweight and obesity. Available at:  
38 656 [https://www.who.int/gho/ncd/risk\\_factors/overweight\\_obesity/obesity\\_adults/en/](https://www.who.int/gho/ncd/risk_factors/overweight_obesity/obesity_adults/en/) Accessed  
39 657 August 14, 2019.  
40  
41 658 55 Herpertz S, Zwaan M, Zipfel S. *Handbuch Essstörungen und Adipositas.* Berlin, Heidelberg:  
42 659 Springer Berlin Heidelberg 2015.  
43  
44  
45  
46  
47  
48  
49  
50  
51  
52  
53  
54  
55  
56  
57  
58  
59  
60

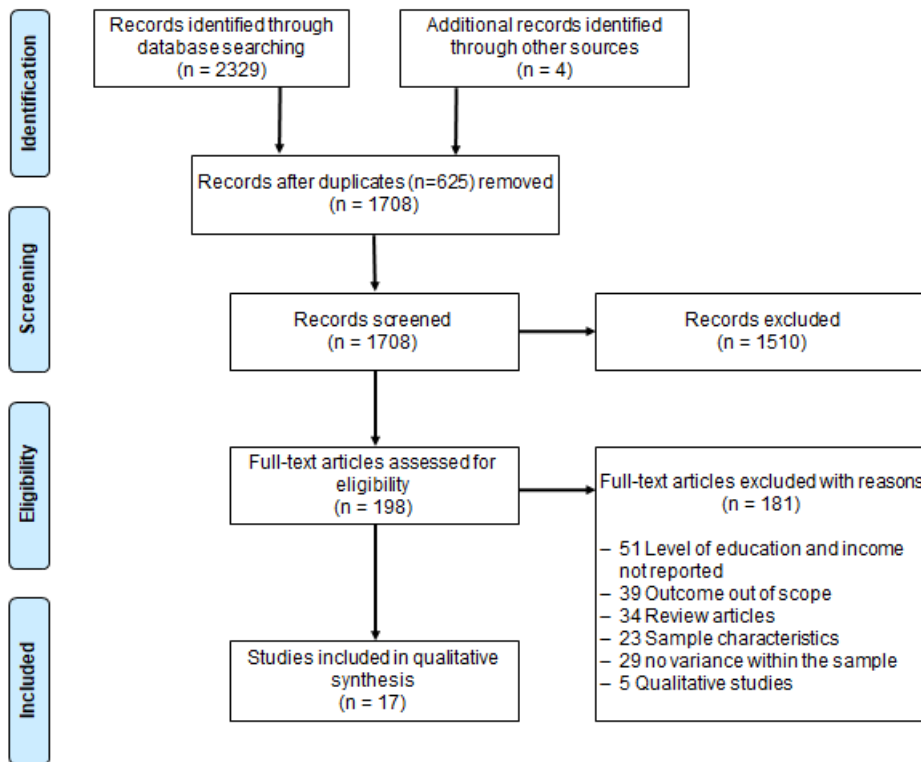

Figure 1 Phases of the systematic review

Peer review only

|  |                       |
|--|-----------------------|
|  | Low risk of bias      |
|  | Moderate risk of bias |
|  | High risk of bias     |
|  | Not reported          |

### Supplementary Material 1. Assessment of Risk of Bias

|                               | 1   | 2        | 3   | 4   | 5        | 6    | 7   | 8        | 9    | 10  | 11       | 12       | 13       | 14   | 15       | 16       | 17       | 18       | 19  | 20  |
|-------------------------------|-----|----------|-----|-----|----------|------|-----|----------|------|-----|----------|----------|----------|------|----------|----------|----------|----------|-----|-----|
| (Brewis and Wutich, 2012)     | Low | Low      | Not | Low | High     | High | Not | Low      | Low  | Low | Low      | Moderate | Not      | High | Not      | Low      | Low      | Moderate | Not | Low |
| (Hansson and Rasmussen, 2014) | Low | Low      | Not | Low | Moderate | High | Not | Low      | Low  | Low | Low      | Moderate | Not      | High | Moderate | Low      | Low      | Low      | Not | Low |
| (Hilbert et al., 2017)        | Low | Low      | Not | Low | Low      | Low  | Not | Low      | Low  | Low | Low      | Low      | Not      | High | Moderate | Low      | Low      | Low      | Not | Low |
| (Jimenez-Cruz et al., 2012)   | Low | Low      | Not | Low | High     | High | Not | Moderate | Low  | Low | Moderate | Low      | Not      | High | Moderate | Moderate | Moderate | Moderate | Not | Low |
| (Lippa and Sanderson, 2012)   | Low | Moderate | Not | Low | Moderate | High | Not | Low      | Low  | Low | Low      | Low      | Not      | High | Low      | Low      | Low      | Low      | Not | Low |
| (Lund et al., 2015)           | Low | Low      | Not | Low | Moderate | High | Not | High     | High | Low | Moderate | Moderate | Not      | High | Low      | Low      | Low      | Low      | Not | Low |
| (Oliver and Lee, 2005)        | Low | Low      | Not | Low | Low      | Low  | Not | Not      | Not  | Low | Low      | High     | Moderate | High | Low      | Low      | Low      | High     | Not | Low |
| (Puhl et al., 2011)           | Low | Low      | Not | Low | Low      | Low  | Not | Low      | Low  | Low | Low      | Low      | Not      | High | Low      | Low      | Low      | Low      | Not | Low |
| (Puhl et al., 2015)           | Low | Low      | Not | Low | Low      | Low  | Not | Low      | Low  | Low | Low      | Low      | Not      | High | Low      | Low      | Low      | Low      | Not | Low |
| (Puhl and Heuer, 2011)        | Low | Low      | Not | Low | Low      | Low  | Not | Low      | Low  | Low | Low      | Low      | Not      | High | Not      | Low      | Low      | Low      | Not | Low |
| (Puhl et al., 2015)           | Low | Low      | Not | Low | Low      | Low  | Not | Low      | Low  | Low | Low      | Low      | Not      | High | Low      | Low      | Low      | Low      | Not | Low |
| (Puhl and Liu, 2015)          | Low | Low      | Not | Low | Low      | Low  | Not | High     | Low  | Low | Low      | Low      | Not      | High | Low      | Low      | Low      | Low      | Not | Low |
| (Seo and Torabi, 2006)        | Low | Low      | Not | Low | Low      | Low  | Not | Not      | Not  | Low | Low      | Moderate | Not      | Low  | Not      | Low      | Low      | Low      | Not | Low |
| (Sikorski et al., 2012)       | Low | Low      | Not | Low | Low      | Low  | Not | Low      | Low  | Low | Low      | Moderate | Not      | High | Low      | Low      | Low      | Low      | Not | Low |
| (Suh et al., 2014)            | Low | Low      | Not | Low | Moderate | Low  | Not | Low      | Low  | Low | Low      | Low      | Not      | High | Low      | Low      | Low      | Low      | Not | Low |
| (Swami and Monk, 2013)        | Low | Low      | Not | Low | High     | High | Not | Low      | Low  | Low | Low      | Moderate | Not      | High | Low      | Low      | Low      | Low      | Not | Low |

#### AXIS – Tool to assess the quality of cross-sectional studies (Downes et al., 2016)

1. Were the aims/objectives of the study clear?
2. Was the study design appropriate for the stated aim(s)?
3. Was the sample size justified?
4. Was the target/reference population clearly defined? (Is it clear who the research was about?)
5. Was the sample frame taken from an appropriate population base so that it closely represented the target/reference population under investigation?
6. Was the selection process likely to select subjects/participants that were representative of the target/reference population under investigation?
7. Were measures undertaken to address and categorise non-responders?
8. Were the risk factor and outcome variables measured appropriate to the aims of the study?
9. Were the risk factor and outcome variables measured correctly using instruments/measurements that had been trialled, piloted or published previously?
10. Is it clear what was used to determine statistical significance and/or precision estimates? (eg, p values, CIs)
11. Were the methods (including statistical methods) sufficiently described to enable them to be repeated?
12. Were the basic data adequately described?
13. Does the response rate raise concerns about non-response bias?
14. If appropriate, was information about non-responders described?
15. Were the results internally consistent?
16. Were the results for the analyses described in the methods, presented?
17. Were the authors' discussions and conclusions justified by the results?
18. Were the limitations of the study discussed?
19. Were there any funding sources or conflicts of interest that may affect the authors' interpretation of the results?
20. Was ethical approval or consent of participants attained?

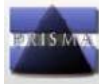

# PRISMA 2009 Checklist

| Section/topic                      | #  | Checklist item                                                                                                                                                                                                                                                                                              | Reported on page # |
|------------------------------------|----|-------------------------------------------------------------------------------------------------------------------------------------------------------------------------------------------------------------------------------------------------------------------------------------------------------------|--------------------|
| <b>TITLE</b>                       |    |                                                                                                                                                                                                                                                                                                             |                    |
| Title                              | 1  | Identify the report as a systematic review, meta-analysis, or both.                                                                                                                                                                                                                                         | 1                  |
| <b>ABSTRACT</b>                    |    |                                                                                                                                                                                                                                                                                                             |                    |
| Structured summary                 | 2  | Provide a structured summary including, as applicable: background; objectives; data sources; study eligibility criteria, participants, and interventions; study appraisal and synthesis methods; results; limitations; conclusions and implications of key findings; systematic review registration number. | 2                  |
| <b>INTRODUCTION</b>                |    |                                                                                                                                                                                                                                                                                                             |                    |
| Rationale                          | 3  | Describe the rationale for the review in the context of what is already known.                                                                                                                                                                                                                              | 3-5                |
| Objectives                         | 4  | Provide an explicit statement of questions being addressed with reference to participants, interventions, comparisons, outcomes, and study design (PICOS).                                                                                                                                                  | 5                  |
| <b>METHODS</b>                     |    |                                                                                                                                                                                                                                                                                                             |                    |
| Protocol and registration          | 5  | Indicate if a review protocol exists, if and where it can be accessed (e.g., Web address), and, if available, provide registration information including registration number.                                                                                                                               | -                  |
| Eligibility criteria               | 6  | Specify study characteristics (e.g., PICOS, length of follow-up) and report characteristics (e.g., years considered, language, publication status) used as criteria for eligibility, giving rationale.                                                                                                      | 5-7                |
| Information sources                | 7  | Describe all information sources (e.g., databases with dates of coverage, contact with study authors to identify additional studies) in the search and date last searched.                                                                                                                                  | 5-6                |
| Search                             | 8  | Present full electronic search strategy for at least one database, including any limits used, such that it could be repeated.                                                                                                                                                                               | 5-7                |
| Study selection                    | 9  | State the process for selecting studies (i.e., screening, eligibility, included in systematic review, and, if applicable, included in the meta-analysis).                                                                                                                                                   | 6-7                |
| Data collection process            | 10 | Describe method of data extraction from reports (e.g., piloted forms, independently, in duplicate) and any processes for obtaining and confirming data from investigators.                                                                                                                                  | 6-7                |
| Data items                         | 11 | List and define all variables for which data were sought (e.g., PICOS, funding sources) and any assumptions and simplifications made.                                                                                                                                                                       | 6                  |
| Risk of bias in individual studies | 12 | Describe methods used for assessing risk of bias of individual studies (including specification of whether this was done at the study or outcome level), and how this information is to be used in any data synthesis.                                                                                      | 6-7                |
| Summary measures                   | 13 | State the principal summary measures (e.g., risk ratio, difference in means).                                                                                                                                                                                                                               | 14-15              |
| Synthesis of results               | 14 | Describe the methods of handling data and combining results of studies, if done, including measures of consistency (e.g., $I^2$ ) for each meta-analysis.                                                                                                                                                   | No meta-analysis   |



# PRISMA 2009 Checklist

Page 1 of 2

| Section/topic                 | #  | Checklist item                                                                                                                                                                                           | Reported on page # |
|-------------------------------|----|----------------------------------------------------------------------------------------------------------------------------------------------------------------------------------------------------------|--------------------|
| Risk of bias across studies   | 15 | Specify any assessment of risk of bias that may affect the cumulative evidence (e.g., publication bias, selective reporting within studies).                                                             | 5                  |
| Additional analyses           | 16 | Describe methods of additional analyses (e.g., sensitivity or subgroup analyses, meta-regression), if done, indicating which were pre-specified.                                                         | No meta-analysis   |
| <b>RESULTS</b>                |    |                                                                                                                                                                                                          |                    |
| Study selection               | 17 | Give numbers of studies screened, assessed for eligibility, and included in the review, with reasons for exclusions at each stage, ideally with a flow diagram.                                          | 6                  |
| Study characteristics         | 18 | For each study, present characteristics for which data were extracted (e.g., study size, PICOS, follow-up period) and provide the citations.                                                             | 10-13              |
| Risk of bias within studies   | 19 | Present data on risk of bias of each study and, if available, any outcome level assessment (see item 12).                                                                                                | 5                  |
| Results of individual studies | 20 | For all outcomes considered (benefits or harms), present, for each study: (a) simple summary data for each intervention group (b) effect estimates and confidence intervals, ideally with a forest plot. | 11-14              |
| Synthesis of results          | 21 | Present results of each meta-analysis done, including confidence intervals and measures of consistency.                                                                                                  | No meta-analysis   |
| Risk of bias across studies   | 22 | Present results of any assessment of risk of bias across studies (see Item 15).                                                                                                                          | 5                  |
| Additional analysis           | 23 | Give results of additional analyses, if done (e.g., sensitivity or subgroup analyses, meta-regression [see Item 16]).                                                                                    | -                  |
| <b>DISCUSSION</b>             |    |                                                                                                                                                                                                          |                    |
| Summary of evidence           | 24 | Summarize the main findings including the strength of evidence for each main outcome; consider their relevance to key groups (e.g., healthcare providers, users, and policy makers).                     | 15-18              |
| Limitations                   | 25 | Discuss limitations at study and outcome level (e.g., risk of bias), and at review-level (e.g., incomplete retrieval of identified research, reporting bias).                                            | 20                 |
| Conclusions                   | 26 | Provide a general interpretation of the results in the context of other evidence, and implications for future research.                                                                                  | 18-20              |
| <b>FUNDING</b>                |    |                                                                                                                                                                                                          |                    |
| Funding                       | 27 | Describe sources of funding for the systematic review and other support (e.g., supply of data); role of funders for the systematic review.                                                               | 22                 |

From: Moher D, Liberati A, Tetzlaff J, Altman DG, The PRISMA Group (2009). Preferred Reporting Items for Systematic Reviews and Meta-Analyses: The PRISMA Statement. PLoS Med 6(7): e1000097. doi:10.1371/journal.pmed1000097

For more information, visit: [www.prisma-statement.org](http://www.prisma-statement.org).

For peer review only - <http://bmjopen.bmj.com/site/about/guidelines.xhtml>

# BMJ Open

## Does weight-related stigmatization and discrimination depend on educational attainment and level of income? A systematic review

|                                 |                                                                                                                                                                                                                                                                                                                                                                                                                                                                                                                        |
|---------------------------------|------------------------------------------------------------------------------------------------------------------------------------------------------------------------------------------------------------------------------------------------------------------------------------------------------------------------------------------------------------------------------------------------------------------------------------------------------------------------------------------------------------------------|
| Journal:                        | <i>BMJ Open</i>                                                                                                                                                                                                                                                                                                                                                                                                                                                                                                        |
| Manuscript ID                   | bmjopen-2018-027673.R2                                                                                                                                                                                                                                                                                                                                                                                                                                                                                                 |
| Article Type:                   | Original research                                                                                                                                                                                                                                                                                                                                                                                                                                                                                                      |
| Date Submitted by the Author:   | 16-Oct-2019                                                                                                                                                                                                                                                                                                                                                                                                                                                                                                            |
| Complete List of Authors:       | Bernard, Marie; Integrated Research and Treatment Center AdiposityDiseases (IFB), University of Leipzig; SRH University of Applied Health Sciences, Fankhänel, Thomas; SRH University of Applied Health Sciences, Riedel-Heller, Steffi; University of Leipzig, Institute of Social Medicine, Occupational Health and Public Health (ISAP), Medical Faculty Luck-Sikorski, Claudia; Integrated Research and Treatment Center AdiposityDiseases (IFB), University of Leipzig; SRH University of Applied Health Sciences |
| <b>Primary Subject Heading</b>: | Sociology                                                                                                                                                                                                                                                                                                                                                                                                                                                                                                              |
| Secondary Subject Heading:      | Sociology, Public health                                                                                                                                                                                                                                                                                                                                                                                                                                                                                               |
| Keywords:                       | obesity, stigma, discrimination, education, income                                                                                                                                                                                                                                                                                                                                                                                                                                                                     |
|                                 |                                                                                                                                                                                                                                                                                                                                                                                                                                                                                                                        |

SCHOLARONE™  
Manuscripts

1  
2  
3 1 Does weight-related stigmatization and discrimination depend on  
4  
5 2 educational attainment and level of income?  
6  
7 3 A systematic review  
8  
9

---

10 4 **Bernard, Marie** <sup>a,b,\*</sup>, **Fankhänel, Thomas** <sup>b</sup>, **Riedel-Heller, Steffi G.** <sup>c</sup>, **Luck-Sikorski, Claudia** <sup>a,b</sup>

- 11 5  
12 6  
13 7  
14 8  
15 9  
16 10  
17 11  
18 12  
19 13  
20 14  
21 15  
22 16  
23 17  
24 18  
25 19  
26 20  
27 21  
28 22  
29 23  
30 24  
31 25
- <sup>a</sup> Integrated Research and Treatment Center AdiposityDiseases (IFB), University of Leipzig, Philipp-Rosenthal-Straße 27, 04103 Leipzig, Germany
  - <sup>b</sup> SRH University of Applied Health Sciences, Neue Straße 28-30, 07548 Gera, Germany
  - <sup>c</sup> Institute of Social Medicine, Occupational Health and Public Health (ISAP), University of Leipzig, Philipp-Rosenthal-Straße 55, 04103 Leipzig, Germany

\* Corresponding author

**Marie Bernard**

Leipzig University Medical Center  
IFB Adiposity Diseases  
Philipp-Rosenthal-Straße 27  
04103 Leipzig, Germany  
Tel.: 0049365-773407-42

E-Mail: [marie.bernard@medizin.uni-leipzig.de](mailto:marie.bernard@medizin.uni-leipzig.de)

Word count 5,327

## 26 **Abstract**

27 **Objectives:** Obesity is considered a global health issue, not only because of its health-  
28 related consequences but also because of its impact on social status as a result of stigma.  
29 This study aims to review the quantitative state of research regarding socioeconomic  
30 characteristics' influence on weight-related stigmatization and discrimination. Based on  
31 Bourdieu's Theory of Class and his concept of "habitus," it is assumed that people with a  
32 higher level of education and income show stronger negative attitudes toward people with  
33 obesity.

34 **Method:** A narrative systematic literature review was conducted in 2017 using PubMed,  
35 PsychINFO, Web of Science, and the Cochrane Library. Seventeen studies that measured  
36 weight bias and either educational attainment or level of income were included in the  
37 analysis.

38 **Results:** The results of the studies included were inconsistent: six of these studies were  
39 found to support the hypothesis, whereas two of the studies contradicted it. The remaining  
40 seven studies did not show any significant correlation between weight bias and either  
41 education or income.

42 **Conclusion:** In light of the inconsistent and heterogeneous results of the studies that report  
43 a significant association between weight bias and socioeconomic variables, the findings must  
44 be discussed concerning their cultural context, i.e., cultural and governmental differences.  
45 Furthermore, educational attainment seems to be more likely to predict weight bias than  
46 income. The review revealed a lack of research when it came to examining the impact of  
47 socioeconomic capital on weight bias.

48 **Keywords:** obesity, stigma, discrimination, education, income

### 49 **Strength and limitations of this study**

- 50     ▪ A systematic review following the PRISMA guidelines was conducted to investigate  
51     the relationship between weight bias and the socioeconomic status of studies  
52     published in English or German.
- 53     ▪ Study selection was performed by two independent reviewers to minimize subjectivity  
54     and random errors.
- 55     ▪ This study is limited since no meta-analysis could be performed due to divergent  
56     study designs, instruments used, or different ways items were operationalized for  
57     statistical analysis



## 58 Introduction

59 According to the World Health Organization (WHO), the worldwide prevalence of  
60 obesity, defined by a body mass index (BMI) of over 30 kg/m<sup>2</sup>, nearly tripled between  
61 1975 and 2016 [1]. To give but two examples, current data reveal an obesity rate of  
62 over 21% in Germany and 37.7% in the US [2, 3]. With its escalating rate, obesity  
63 can be classified as a global health issue, primarily because it is associated with  
64 numerous comorbid diseases, such as diabetes mellitus, cardiovascular diseases,  
65 and certain forms of cancer [4].

66  
67 Not only health-related consequences are connected to obesity, but also  
68 psychological implications that affect those concerned on a social level [5]. In  
69 particular, obesity is classified as a stigmatized condition. Therefore, being obese is a  
70 characteristic that sets those affected apart from people with normal weight. Since  
71 obesity is mislabeled as a self-inflicted situation, numerous negative stereotypes,  
72 such as laziness, lack of willpower, unhealthy lifestyle, and being unintelligent are  
73 associated with the condition [6, 7]. Stigmatization leads to discriminating behavior  
74 toward people with obesity in the form of mistreatment in several areas of life, such  
75 as labor market, healthcare, and educational system [6, 7].

76 The systematic review of Spahlholz [8] revealed increased perceived discrimination  
77 toward people with obesity in comparison to people with normal weight, especially  
78 toward people with more extreme obesity (BMI >35 kg/m<sup>2</sup>) as well as toward women.  
79 Moreover, the prevalence of weight-related discrimination accelerated over time. In  
80 the US, the prevalence of weight-related discrimination was nine times higher (66%)  
81 in 2005 than in 1995 (7.3%) [7, 8] and is thus similar to the rate of racial  
82 discrimination, particularly against women [9]. Understanding the origin of stigma,  
83 which can be seen as the catalyst for structural discrimination, is necessary to  
84 prevent discriminating behavior. Although weight-related stigmatization and  
85 discrimination are closely linked, they need to be considered as two divergent  
86 concepts. However, in the following, we will refer to weight-related stigmatization and  
87 discrimination as “weight bias”, but will differentiate between both concepts whenever  
88 needed.

1  
2  
3 89 Some people are more prone to display weight bias than other: There is some  
4  
5 90 evidence that older age is associated with stigmatizing attitudes [10–12] and stronger  
6  
7 91 evidence that men show stronger weight bias than women [13–16]. When looking at  
8  
9 92 the body and beauty perception of people, the cultural framework also needs to be  
10  
11 93 considered as a determinant of stigma. According to Bourdieu, the predominant  
12  
13 94 cultural context determines which values and characteristics can be seen either as  
14  
15 95 desirable or traits to be stigmatized [17]. Depending on regional characteristics,  
16  
17 96 weight is perceived as a sign of class distinction: In undeveloped countries,  
18  
19 97 overweight was associated positively with well-being and wealth, while in developed  
20  
21 98 countries a negative view of being overweight was widespread. Thus, in developed  
22  
23 99 countries, thinness has been viewed as a sign of beauty, success, and an overall  
24  
25 100 high (socioeconomic) status [18]. Although in the last decades the perception of  
26  
27 101 obesity or rather slim-body ideals developing countries might have changed [19, 20],  
28  
29 102 results indicate that educational attainment and level of income seem to be relevant  
30  
31 103 regarding weight bias.

32  
33 104

34 105 Although socioeconomic variables and obesity correlate closely, the impact of  
35  
36 106 educational attainment and level of income on weight bias remain ambiguous.  
37  
38 107 Several studies have shown the negative impact of being overweight on the labor  
39  
40 108 market, especially for women [21, 22] as well as in the education system [23]. In  
41  
42 109 addition, a lower level of education and income is associated with obesogenic  
43  
44 110 behavior such as a poor diet and a lack of exercise caused by factors such as stress  
45  
46 111 [24]. Moreover, Bourdieu [25] sees the most decisive determinant of a healthy  
47  
48 112 lifestyle in socioeconomic class. While people that belong to the working class  
49  
50 113 preferred tasty and nutritious food, people from the upper-middle class preferred food  
51  
52 114 that can be described as light, healthy, and low in calories, according to his study.  
53  
54 115 Subsequently, people with a higher level of education and income might choose a  
55  
56 116 healthier lifestyle to distance themselves from people with obesity [26].

57 117 As a superior framework to generate missing hypotheses, Bourdieu's Theory of  
58  
59 118 Class can be applied [25]. Following his concept of "habitus," a person's general  
60  
119 attitude, lifestyle, and even body shape can be seen as a metaphor for social status  
120 [18]. Furthermore, Bourdieu considers stigma as a form of symbolic power and a tool

1  
2  
3 121 to serve the interests of the powerful [27]. Phelan and colleagues [28] continue with  
4  
5 122 his line thought and presented three motives of stigma, namely *keeping people in,*  
6  
7 123 *away, or down.* Particularly, *keeping people down* applies to the review's theoretical  
8  
9 124 framework. Link and Phelan [17] discuss stigma as an instrument of a dominant  
10  
11 125 group to keep another group down to attain or maintain high social status, wealth,  
12  
13 126 and power. However, a person's educational attainment and level of income are  
14  
15 127 mainly invisible characteristics; thus, there are other attributes that more readily show  
16  
17 128 social status. Assuming that obesity is perceived as a metaphor for lower social  
18  
19 129 status, groups with higher social status might be aware of this link and keep people  
20  
21 130 with obesity down to empower themselves. In this review, it is therefore assumed that  
22  
23 131 people with a higher level of education and income display negative attitudes toward  
24  
25 132 people with obesity in comparison to people with lower educational attainment and  
26  
27 133 income. The impact of educational attainment and level of income on weight bias will  
28  
29 134 be examined and compared.

135

30  
31 136 Based on a sociological perspective, this systematic literature review attempts to  
32  
33 137 outline the current state of research and reveal the relationship between weight bias  
34  
35 138 and the level of education and income. Tyler and Slater [29] criticized inter alia "*that*  
36  
37 139 *one of the major limitations of existing understandings of stigma is the ways in which*  
38  
39 140 *they have 'bracketed off' key questions, such as where stigmatizing attitudes come*  
40  
41 141 *from, how and by whom is stigma crafted, mediated, produced and why [...].*" The  
42  
43 142 general aim of this review is thus to identify social and economic groups that  
44  
45 143 stigmatize and discriminate against those who are obese. In the future, this  
46  
47 144 information could help researchers to develop and implement interventions in a more  
48  
49 145 targeted manner.

## 146 **Methods**

### 147 Search Strategy

50  
51 148 A systematic review of published studies reporting weight-related attitudes held by  
52  
53 149 differing socioeconomic status groups was conducted by using the relevant scientific  
54  
55 150 electronic databases: PubMed, PsychINFO, Web of Science, and the Cochrane  
56  
57 151 Library. The review followed the Prisma Guidelines [30].  
58  
59  
60

1  
2  
3 152 The systematic review of literature was performed independently by two reviewers  
4  
5 153 using the following keywords: stigma\*, discrimination, "weight bias", or prejudice;  
6  
7 154 education\*, income, salary, wage, status, socio-economic, socioeconomic\*, SES,  
8  
9 155 sociodemographic, or socio-demographics; and obes\*, overweight, or fat. Giving a  
10  
11 156 very high number of results, the literature search was limited to the publications' titles  
12  
13 157 and abstracts. Only published studies written in English or German were included.  
14  
15 158 There was no restriction regarding the year of publication. The stages of the  
16  
17 159 systematic literature search are provided in Fig. 1. The literature review was  
18  
19 160 conducted for all studies that have been published until June 2019.

### 19 161 Data extraction

20  
21 162 The systematic search of the literature revealed 2,331 studies, whereby 1,708  
22  
23 163 studies remained after removing duplicates. Furthermore, 1,510 studies were  
24  
25 164 excluded because screening their titles and abstracts for eligibility showed no  
26  
27 165 association with the research question. Disagreement and uncertainty between the  
28  
29 166 two reviewers over the eligibility were resolved by reinspecting the papers in detail  
30  
31 167 and discussing disparate perspectives. For the remaining 198 studies, full articles  
32  
33 168 were screened in detail to assess their eligibility. For data extraction we used an  
34  
35 169 adjusted PICO scheme [31]: Studies that collected data of an adult sample (P) which  
36  
37 170 assessed stigmatizing and discriminating attitudes (I) depending on socioeconomic  
38  
39 171 variables (C) to investigate if weight bias is associated with socioeconomic status  
40  
41 172 (O). The detailed inclusion and exclusion criteria are presented in the following.

### 41 173 Inclusion criteria

42  
43 174 Studies that report associations between weight bias and either educational  
44  
45 175 attainment or level of income were included. Weight bias was operationalized to  
46  
47 176 reflect stigmatizing and discriminating attitudes. Therefore, studies that measured  
48  
49 177 stigmatizing attitudes by applying explicit and implicit instruments will be included, but  
50  
51 178 also studies that assessed causal beliefs about obesity, which can be considered as  
52  
53 179 proxy variable as previously done before [32]. Studies that assessed discriminating  
54  
55 180 attitudes, for example, by measuring the support for weight-related antidiscrimination  
56  
57 181 policies and law, or considering obesity as a financial burden are considered for  
58  
59 182 inclusion. According to Woolford et al. [33], who found less support to cover obesity-

1  
2  
3 183 related costs by public health insurances, the public's opinion can be seen as a  
4 184 potential guideline for insurance funds [33]. In other words, based on the public's  
5 185 view, discrimination might occur in the field of health insurance policies. This  
6 186 assumption might be of particular importance when considering the increased  
7 187 obesity-related healthcare cost [34].

### 12 188 Exclusion criteria

14 189 The following exclusion criteria were used to eliminate studies that were not  
15 190 applicable: (a) studies with a sample of health care professionals, dietitians,  
16 191 psychologists, and physical educators; (b) studies that investigated stigmatizing  
17 192 attitudes of children and/or adolescents; (c) studies that investigated stigma toward  
18 193 childhood obesity; (d) studies with an overweight and/or obese sample that  
19 194 investigated perceived stigmatization; (e) studies with a homogenous sample in  
20 195 regard to educational attainment (e.g., students) or level of income; (f) studies that  
21 196 investigated weight bias toward extended stigma groups (e.g., obese and binge  
22 197 eating); and (g) reviews or qualitative studies. The flowchart (Figure 1) displays how  
23 198 many studies were excluded in accordance with the exclusion criteria. In summary,  
24 199 50 studies were excluded because they did not report the participants' educational  
25 200 attainment or income. In addition, 29 studies did assess data of a sample with no  
26 201 variance concerning socioeconomic characteristics, and 23 studies were excluded  
27 202 because of the samples' characteristics (overweight/obese or children/adolescents  
28 203 sample). Five studies were excluded because they followed a qualitative approach,  
29 204 and 34 studies were excluded because they could be categorized as reviews. Thirty-  
30 205 nine studies were found that did not meet the criteria for the aimed outcome of weight  
31 206 bias. Two studies were neither published in English nor German.

32 207 Moreover, one paper had to be excluded because of its lack of academic  
33 208 background. After excluding the studies that did not meet our criteria, 17 studies  
34 209 were identified as relevant for in-depth investigation (Figure 1). Therefore, sampling  
35 210 characteristics, study design, assessment of weight bias, and measurement of  
36 211 educational attainment and income were systematically examined.

## 212 Risk of Bias

213 We assessed the risk of bias of all studies included using the Appraisal tool for  
214 Cross-Sectional Studies (AXIS) developed by Downes and colleagues [35]. The  
215 studies were therefore examined regarding potential causes that might induce a  
216 specific risk of bias.

## 217 Patient and Public Involvement

218 Within this study, no patient data were collected. We conducted a systematic review  
219 and analyzed data that had already been collected. Thus, patients were not involved  
220 in this study.

## 221 **Results**

222 The 17 studies included were tabulated according to the following characteristics: the  
223 origin of the sample, sample size (N), sample characteristics, study design,  
224 instruments to assess weight bias, educational attainment or income, and a summary  
225 of results. Studies reviewed in detail are tabulated by either educational attainment  
226 (Table 1) or by the level of income (Table 2).

## 227 Study characteristics

228 All relevant study characteristics are summarized in Table 1 and Table 2,  
229 respectively. Seven out of seventeen studies are based entirely on an American  
230 sample [36–42]. Two other studies are based on an American and an Icelandic  
231 sample [43, 44]. These two studies also provided data based on a Canadian sample  
232 of health care professionals and American, Australian, and Icelandic student samples  
233 that did not meet the inclusion criteria and therefore all four samples had to be  
234 excluded. Three studies were based on a German sample [10, 45, 46] and five  
235 studies based on one sample, from Paraguay [47], Mexico [48], Sweden [49],  
236 Denmark [50], and Great Britain [51] respectively. The study by Brewis and Wutich  
237 [47], based on a Paraguayan sample also provided data of a comparison group of  
238 US-undergraduate students that were not considered in the analysis because of the  
239 homogenous study sample in terms of educational attainment. The seventeen  
240 studies included showed a wide variety of sample sizes ranging from 198 [51] to  
241 3,502 participants [37].

1  
2  
3 242 Since the aim of the study was to outline the impact that socioeconomic status in the  
4 243 form of educational attainment and level of income have on weight bias, attention  
5 244 was paid to a variation in these variables within the samples. The studies included  
6 245 therefore focused either on a population-based sample [10, 38, 39, 45, 46, 49] or an  
7 246 convenience sample [37, 40, 41, 43, 44, 50]. Although Jiminez-Cruz and colleagues  
8 247 [48] investigated stigmatizing attitudes of an entirely low-income sample, they divided  
9 248 the socioeconomic factors (level of education and income) into five and four  
10 249 categories respectively; thus, variation within the sample could be ensured.  
11 250 Moreover, an investigation of weight bias in different gradations of lower status  
12 251 groups could provide further insight into the topic. In one study [36], the general  
13 252 population was included, whereby the overweight participants received an alternative  
14 253 questionnaire assessing the perceived stigmatization and not their stigmatizing  
15 254 attitudes toward obesity. Therefore, only the normal weight sample could be  
16 255 included.

17 256 The distribution of women and men was equally considered in the majority of studies,  
18 257 even though more women than men were included. However, two studies posed an  
19 258 exception. The study of Brewis et al. [47] and the study of Jiminez-Cruz [48]  
20 259 investigated only the stigmatizing attitudes of female participants.

21 260 We also assessed the risk of bias among all studies that fulfilled the inclusion criteria.  
22 261 None of these studies justified the sample size; however, despite a risk of bias  
23 262 regarding the non-responders (i.e., no categorization, description, and ratio between  
24 263 the response and non-response rate) the majority of the studies included showed a  
25 264 low risk of bias. Only a few studies were detected to be at moderate risk of bias  
26 265 based on the sampling procedure [36–41]. The summarized risk of bias assessment  
27 266 of all studies included is provided as a supplementary table (Supplementary Material  
28 267 1)

268 Table 1 Summary of Selected Studies: Weight Bias Depending on Educational Attainment

| Study                                              | N     | Sample Discription                                       | Instruments Weight bias             | Educational attainment                                                                                                              | Association's Direction <sup>1</sup> | Magnitude of Association                                                                                                                                                                                                                                                             |
|----------------------------------------------------|-------|----------------------------------------------------------|-------------------------------------|-------------------------------------------------------------------------------------------------------------------------------------|--------------------------------------|--------------------------------------------------------------------------------------------------------------------------------------------------------------------------------------------------------------------------------------------------------------------------------------|
| <b>Form of weight bias: stigmatizing attitudes</b> |       |                                                          |                                     |                                                                                                                                     |                                      |                                                                                                                                                                                                                                                                                      |
| [46]; GER                                          | 3003  | population based<br>(ø age: 51.7 years;<br>52.8% female) | Short-FPS[1]                        | 4 subgroups:<br>- No degree<br>- 9 <sup>th</sup> grade degree<br>- 10 <sup>th</sup> grade degree<br>- 12 <sup>th</sup> grade degree | <b>Negative</b>                      | Multivariate Regression:<br>- No degree = reference category<br>- 9th grade: $\beta = -0.278$ , $p < 0.01$ , (std. error 0.0852)<br>- 10th grade: $\beta = -0.251$ , $p < 0.01$ (std. error 0.0838)<br>- Upper secondary school: $\beta = -0.214$ , $p < 0.05$ , (std. error 0.0835) |
| [10]; GER                                          | 960   | US adults<br>(ø age: 43.8 years;<br>50.2% female)        | WCB [2];                            | 2 subgroups:<br>- Low; <13 years of education<br>- High; $\geq 13$ years of education)                                              | <b>Negative</b>                      | Multiple linear regression<br>- $\beta = -0.16$ , $p < 0.001$<br><br>Zero-order association<br>- $r = -0.18$ , $p < 0.0001$                                                                                                                                                          |
| [48]; MEX                                          | 1,100 | Women aged 18-40<br>of low SES (ø age:<br>37.5 years)    | Beliefs about the causes of obesity | 5 subgroups:<br>- None<br>- some elementary<br>- elementary<br>- middle<br>- high school                                            | <b>Positive</b>                      | Logistic regression<br>- "Having an unhealthy lifestyle": unadjusted OR=2.56, $p < 0.001$ , Confidence Interval 1.88-3.49                                                                                                                                                            |
| [43]; USA and ISL                                  | 899   | US adults<br>(ø age: 40.9 years;<br>46.1% female)        | Short-FPS [1];<br>UMB-FAT [3]       | 3 subgroups:<br>- High school or less<br>- Some college/technical or vocation degree<br>- College graduate or higher                | FPS:<br>Mixed                        | Linear regression:<br>- High school or less = reference category<br>- Vocational training/some college ( $\beta = 0.202$ , $p < 0.05$ )<br>- College ( $\beta = 0.141$ , $p > 0.1$ )<br>- Postgraduate ( $\beta = -0.017$ , $p > 0.1$ )                                              |
|                                                    |       |                                                          |                                     |                                                                                                                                     | UMB-Fat: Positive                    | Linear regression:<br>- High school or less = reference category<br>- Vocational training/some college: $\beta = 0.102$ , $p > 0.1$<br>- College: $\beta = 0.189$ , $p < 0.05$<br>- Postgraduate: $\beta = 0.034$ , $p > 0.1$                                                        |
|                                                    | 659   | ISL adults<br>(ø age: 45.9 years;<br>55.1% female)       |                                     | 2 subgroups:<br>- High school or less<br>- College                                                                                  | FPS:<br>Positive                     | Linear regression:<br>- High school or less = reference category<br>- College: $\beta = 0.068$ , $p > 0.1$                                                                                                                                                                           |
|                                                    |       |                                                          |                                     |                                                                                                                                     | UMB-Fat: <b>Positive</b>             | Linear regression:<br>- High school or less = reference category<br>- College: $\beta = 0.160$ , $p < 0.05$                                                                                                                                                                          |



|                                                                             |       |                                                                              |                                                         |                                                                                                                                                               |          |                                                                                                                                                                                                                                                                                                                                                                                                                                                                       |
|-----------------------------------------------------------------------------|-------|------------------------------------------------------------------------------|---------------------------------------------------------|---------------------------------------------------------------------------------------------------------------------------------------------------------------|----------|-----------------------------------------------------------------------------------------------------------------------------------------------------------------------------------------------------------------------------------------------------------------------------------------------------------------------------------------------------------------------------------------------------------------------------------------------------------------------|
| [49]; SWE                                                                   | 2,436 | Representative Swedish population aged 25-64 (ø age: 47.8 years; 63% female) | ATOP [4]                                                | 3 subgroups:<br>- Low<br>- Medium<br>- High                                                                                                                   | Negative | Spearman zero-order correlations:<br>- $r = -0.023$ , $p = 0.260$                                                                                                                                                                                                                                                                                                                                                                                                     |
| [40]; USA                                                                   | 1,118 | US adults (ø age: 43.8 years; 50.2% female)                                  | Opinions about obesity as a disease [5]                 | 3 subgroups:<br>- High school or less<br>- Some college/ Technical or vocation degree<br>- College graduate or higher                                         | Mixed    | Linear regression<br>- High school or less = reference category<br><br>Agreement with statements in support of classification<br>- Some college/ technical degree: $\beta = -0.036$ , $p > 0.1$<br>- College graduate or higher: $\beta = 0.035$ , $p > 0.1$<br><br>Agreement with statements in support of classification<br>- Some college/ technical degree: $\beta = -0.03$ , $p > 0.1$<br>- College graduate or higher: $\beta = 0.095$ , $p < 0.1$ but $> 0.05$ |
| [51]; GB                                                                    | 198   | Community-based (ø age: 32.58 year; 50.5% female)                            | PFRS [6]                                                | 5 subgroups<br>- General Certification of Secondary Education<br>- Advanced Level<br>- Undergraduate degree<br>- Postgraduate degree<br>- other qualification | /        | Univariate analysis of variance (ANOVA):<br>- $F(1, 197) = 0.47$ , $p = .705$ , $\eta^2 < 0.01$                                                                                                                                                                                                                                                                                                                                                                       |
| [36]; USA                                                                   | 396   | General, not overweight population (ø age: 42.7 years; 43.7% female)         | Short-FPS[1]                                            | 3 subgroups:<br>- High school or less<br>- Some college/associate degree<br>- Bachelor's degree or higher                                                     | /        | Adjusted model of correlates:<br>- $F(2) = 0.026$ , $p = 0.974$                                                                                                                                                                                                                                                                                                                                                                                                       |
| [47]; PRY                                                                   | 200   | Women (ø age: 38.9 years)                                                    | ATOP [4]; IAT [7]                                       | Metric measurement: years of formal education                                                                                                                 | /        | /                                                                                                                                                                                                                                                                                                                                                                                                                                                                     |
| <b>Form of weight bias: both, stigmatizing and discriminating attitudes</b> |       |                                                                              |                                                         |                                                                                                                                                               |          |                                                                                                                                                                                                                                                                                                                                                                                                                                                                       |
| [39]; USA                                                                   | 981   | US representative sample (62% female)                                        | Beliefs about obesity as a financial burden for society | 4 subgroups:<br>- Less than some high school<br>- High-school graduate<br>- Some college<br>- Higher than a college degree                                    | Positive | Logistic regression<br>- $\leq$ some HS: adjusted OR= 0.25, $p < 0.05$<br>- Some College: adjusted OR= 1.61, $p < 0.05$<br>- $\geq$ College: adjusted OR= 1.97, $p < 0.01$                                                                                                                                                                                                                                                                                            |
|                                                                             |       |                                                                              | Beliefs about the controllability of obesity            |                                                                                                                                                               | Mixed    | Logistic regression<br>- $\leq$ some HS: adjusted OR= 0.99, $p > 0.05$<br>- Some College: adjusted OR= 0.90, $p > 0.05$<br>- $\geq$ College: adjusted OR= 1.68, $p > 0.05$                                                                                                                                                                                                                                                                                            |

269

| Form of weight bias: discriminating attitudes |       |                                                        |                                                                                                                           |                                                                                                                              |          |                                                                                                                                                                                                                                                                                                                                                                                                                                   |
|-----------------------------------------------|-------|--------------------------------------------------------|---------------------------------------------------------------------------------------------------------------------------|------------------------------------------------------------------------------------------------------------------------------|----------|-----------------------------------------------------------------------------------------------------------------------------------------------------------------------------------------------------------------------------------------------------------------------------------------------------------------------------------------------------------------------------------------------------------------------------------|
| [41]; USA                                     | 1,114 | Adults (ø age: 44.87 years; 48% female)                | 6 Statements assessing support of general and employment-specific antidiscrimination laws or policies                     | 3 subgroups:<br>- High school or GED completed<br>- 2-Year vocational/technical degree or some college<br>- College graduate | Positive | Ordinal logistic regression, for all 6 statements<br>- High school/GED = reference category<br>- College: OR 0.28-0.49, p<0.05)                                                                                                                                                                                                                                                                                                   |
| [37]; USA                                     | 3,502 | Adults (age 21-65; 61.9% female)                       | 3 statements assessing support of legal protection and employment-specific antidiscrimination laws or policies            | 3 Subgroups:<br>- High school or less<br>- some college/ technical or vocation degree<br>- College graduate or higher        | Positive | Multiple logistic regression<br>- High school or less = reference category<br>- Some college/Technical or vocation degree<br>▪ Law 1: adjusted OR=0.7, p>0.01<br>▪ Law 2: adjusted OR=0.9, p>0.05<br>▪ Law 3: adjusted OR=1.2, p>0.05<br>- College graduate or higher<br>▪ Law 1: adjusted OR=0.7, p>0.01<br>▪ Law 2: adjusted OR=0.8, p<0.05<br>▪ Law 3: adjusted OR=0.3, p=0.05                                                 |
| [44]; USA and ISL                             | 893   | US adults (ø age:40.9 years; 46.1% female)             | 13 statements assessing support for employment-specific and broader antidiscrimination laws or policies                   | 3 Subgroups<br>- High school or less<br>- some college/technical or vocation degree<br>- College graduate or higher          | Positive | Tobit Regression<br>- High school or less = reference category<br><br>Broad laws and policies<br>- Vocational training/some college: Coeff= -0.135, p>0.05<br>- College: Coeff = -0.223, p>0.05<br>- Postgraduate: Coeff = -0.040, p>0.05<br><br>Employment-specific laws and policies<br>- Vocational training/some college: Coeff= -0.115, p>0.05<br>- College: Coeff= -0.220, p>0.05<br>- Postgraduate: Coeff.= -0.087, p>0.05 |
|                                               | 658   | ISL adults (ø age:45.9 years; 46.1% female)            |                                                                                                                           |                                                                                                                              |          | 2 subgroups<br>- High school or less<br>- College                                                                                                                                                                                                                                                                                                                                                                                 |
| [38]; USA                                     | 1,001 | Population-based sample (ø age:43.8 years; 51% female) | 6 statements assessing support for general, employment-specific and broader policies/ antidiscrimination laws or policies | 3 subgroups<br>- High school<br>- college degree<br>- Postgraduate degree                                                    | Positive | Logistic regression, five of six statements<br>- High school = reference category<br>- Higher degree: OR= 0.56-0.72, p<0.05                                                                                                                                                                                                                                                                                                       |

270

|           |       |                                                            |                                                                                                       |                                                                                          |                                                                                 |                                                                                                                                                                                                                                                                            |
|-----------|-------|------------------------------------------------------------|-------------------------------------------------------------------------------------------------------|------------------------------------------------------------------------------------------|---------------------------------------------------------------------------------|----------------------------------------------------------------------------------------------------------------------------------------------------------------------------------------------------------------------------------------------------------------------------|
| [42]; USA | 909   | US adults                                                  | 2 statements assessing support for antidiscrimination policies                                        | Only 2 subgroups reported:<br>- less than High school<br>- College degree                | <b>Positive</b>                                                                 | Probit Model<br>- Less than High school = reference category<br>"Government should do more to protect obese"<br>- College degree: $\beta = -0.100$ , $p < 0.05$<br>"Overweight should get same protections as disabled"<br>- College degree: $\beta = -0.136$ , $p < 0.01$ |
| [45]; GER | 2,531 | Population-based sample (ø age: 48.79 years; 55.5% female) | 6 Statements assessing support of general and employment-specific antidiscrimination laws or policies | 2 subgroups:<br>- Low (<12 years of education)<br>- High ( $\geq 12$ years of education) | General laws<br><b>Positive</b><br>Employment-specific laws:<br><b>Negative</b> | Logistic regression<br>- Education $\geq 12$ years: OR= 0.60, $p = 0.005$<br>Logistic regression<br>- Education $\geq 12$ years: OR= 1.25, $p = 0.016$                                                                                                                     |
| [50]; DNK | 1,003 | Citizens aged 18-65                                        | Attitudes toward weight-loss surgery & medical treatment of obesity                                   | No details reported                                                                      | /                                                                               | /                                                                                                                                                                                                                                                                          |

271 Note: <sup>1</sup> Bold characters display significant association, Positive = demonstrates greater anti-fat attitudes with increasing educational attainment; Negative = demonstrate greater anti-fat  
 272 attitudes with decreasing educational attainment; N = sample size; FPS = Fat Phobia Scale; UMB = Universal Measure of Bias; WCB = Weight Control/Blame of the Anti-Fat Attitudes Test;  
 273 ATOP = Attitudes to Obese People; IAT = Implicit Association Test; PFRS = Photographic Figure Rating Scale; SES = Socioeconomic status

274 **Table 2 Summary of Selected Studies: Weight Bias Depending on Level of Income**

| Study                                              | N     | Sample Discription                                                           | Instruments Weight bias                 | Level of income                                                                                                                                | Direction of Correlation <sup>1</sup> | Magnitude of Association                                                                                                                                                                                                                                                                                                                                                                                                                                                                                                       |
|----------------------------------------------------|-------|------------------------------------------------------------------------------|-----------------------------------------|------------------------------------------------------------------------------------------------------------------------------------------------|---------------------------------------|--------------------------------------------------------------------------------------------------------------------------------------------------------------------------------------------------------------------------------------------------------------------------------------------------------------------------------------------------------------------------------------------------------------------------------------------------------------------------------------------------------------------------------|
| <b>Form of weight bias: stigmatizing attitudes</b> |       |                                                                              |                                         |                                                                                                                                                |                                       |                                                                                                                                                                                                                                                                                                                                                                                                                                                                                                                                |
| [48]; MEX                                          | 1,100 | Women aged 18-40 of low SES (ø age: 37.5 years)                              | Beliefs about the causes of obesity     | Weekly income, 4 subgroups:<br>- USD < 1,200<br>- USD 1,200-2,000<br>- USD 2,000-4,000<br>- USD ≥ 4,000                                        | Negative                              | Logistic regression<br>- "Having an unhealthy lifestyle: unadjusted OR= 1.13, p>0.05, Confidence Interval 0.78-1.62                                                                                                                                                                                                                                                                                                                                                                                                            |
| [10]; GER                                          | 960   | Population based sample (ø age: 45.9 years; 56.9% female)                    | WCB [2]                                 | Monthly Income, 2 subgroups:<br>- EUR < 2,000<br>- EUR ≥ 2,000                                                                                 | Negative                              | Zero-order association<br>- r= -0.02, p>0.01                                                                                                                                                                                                                                                                                                                                                                                                                                                                                   |
| [49]; SWE                                          | 2,436 | Representative Swedish population aged 25-64 (ø age: 47.8 years; 63% female) | ATOP [4]                                | Annual household income; no subgroups reported                                                                                                 | Positive                              | Pearson and Spearman zero-order correlations:<br>- r=0.018, p= .382                                                                                                                                                                                                                                                                                                                                                                                                                                                            |
| [40]; USA                                          | 1,118 | US adults (ø age:43.8 years; 50.2% female)                                   | Opinions about obesity as a disease [5] | Annual household income, 5 subgroups<br>- USD < 25,000<br>- USD 25,000-49,999<br>- USD 50,000-74,999<br>- USD 75,000-99,999<br>- USD > 100,000 | Mixed                                 | Linear regression<br>- Less than \$25,000 = reference category<br><br>Agreement with statements in support of classification<br>- USD 25,000 - 49,999: β= 0.045, p>0.1<br>- USD 50,000 - 74,999: β= 0.113, p<0.1<br>- USD 75,000 - 99,999: β= 0.084, p>0.1<br>- > USD 100,000: β= -0.026, p>0.1<br><br>Agreement with statements in opposition of classification<br>- USD 25,000 - 49,999: β=0.06, p>0.1<br>- USD 50,000 - 74,999: β=-0.019, p>0.1<br>- USD 75,000 - 99,999: β=0.041, p>0.1<br>- > USD 100,000: β=0.061, p>0.1 |
| [46]; GER                                          | 3003  | population based (ø age:51.7 years; 52.8% female)                            | Short-FPS [1]                           | Monthly household income, 4 subgroups:<br>- EUR < 999<br>- EUR 1,000-1,999<br>- EUR 2,000-2,999<br>- EUR > 3,000                               | /                                     | /                                                                                                                                                                                                                                                                                                                                                                                                                                                                                                                              |

275

|                                                                             |       |                                                                      |                                                                                                                           |                                                                                                                                                     |          |                                                                                                                                                                                                                                                                  |
|-----------------------------------------------------------------------------|-------|----------------------------------------------------------------------|---------------------------------------------------------------------------------------------------------------------------|-----------------------------------------------------------------------------------------------------------------------------------------------------|----------|------------------------------------------------------------------------------------------------------------------------------------------------------------------------------------------------------------------------------------------------------------------|
| [36]; USA                                                                   | 396   | General, not overweight population (ø age: 42.7 years; 43.7% female) | Short-FPS [1]                                                                                                             | Annual household income,5 subgroups:<br>- USD < 20,000<br>- USD 20,000-39,000<br>- USD 40,000-59,000<br>- USD 60,000-79,000<br>- USD > 80,000       | /        | Correlation:<br>- Unadjusted, correlation coefficient not reported, p= 0.305                                                                                                                                                                                     |
| <b>Form of weight bias: Both, stigmatizing and discriminating attitudes</b> |       |                                                                      |                                                                                                                           |                                                                                                                                                     |          |                                                                                                                                                                                                                                                                  |
| [39]; USA                                                                   | 981   | US representative sample (62% female)                                | Beliefs about obesity as a financial burden for society<br><br>Beliefs about the controllability of obesity               | Annual household income, 4 subgroups:<br>- USD < 25,000<br>- USD 25,000 < 50,000<br>- USD 50,000 < 75,000<br>- USD ≥ 75,000                         | Positive | Logistic regression<br>- USD < 25,000 = reference category<br>- USD 25,000 < 50,000: adjusted OR= 1.02, p>0.05<br>- USD 50,000 < 75,000: adjusted OR= 1.57, p>0.05<br>- USD ≥ 75,000: adjusted OR= 3.18, p<0.001                                                 |
|                                                                             |       |                                                                      |                                                                                                                           |                                                                                                                                                     | Negative | Logistic regression<br>- USD < 25,000 = reference category<br>- USD 25,000 < 50,000: adjusted OR= 0.82, p>0.05<br>- USD 50,000 < 75,000: adjusted OR= 0.96, p>0.05<br>- USD ≥ 75,000: adjusted OR= 0.51, p>0.05                                                  |
| <b>Form of weight bias: discriminating attitudes</b>                        |       |                                                                      |                                                                                                                           |                                                                                                                                                     |          |                                                                                                                                                                                                                                                                  |
| [42]; USA                                                                   | 710   | US adults (aged 18 – 65)                                             | 2 statements assessing support for civil protections for the obese                                                        | Annual household income<br>- USD < 15,000<br>- USD > 100,000                                                                                        | Positive | Probit Model<br>- USD < 15,000 = reference category<br>"Government should do more to protect obese"<br>- USD > 100,000: β= -0.098, p<0.01<br>Overweight should get same protections as disabled"<br>- USD > 100,000: β= -0.077, p<0.01                           |
| [45]; GER                                                                   | 2,531 | Population-based sample (ø age: 48.79 years; 55.5% female)           | 6 Statements assessing support of general and employment-specific antidiscrimination laws or policies                     | Monthly Income, 2 subgroups:<br>- EUR < 2,000<br>- EUR ≥ 2,000                                                                                      | Positive | Logistic regression<br>General laws or policies<br>- EUR < 2,000 = reference category<br>- EUR ≥ 2,000: OR=0.67, p=0.002<br>Logistic regression<br>Employment-specific laws or policies<br>- EUR < 2,000 = reference category<br>- EUR ≥ 2,000: OR=0.91, p=0.376 |
| [38]; USA                                                                   | 1,001 | Population based sample (ø age: 43.8 years; 51% female)              | 6 statements assessing support for general, employment-specific and broader policies/ antidiscrimination laws or policies | Annual household income, 5 subgroups<br>- USD 15,000-25,000<br>- USD 25,000-49,999<br>- USD 50,000-74,999<br>- USD 75,000-99,999<br>- USD > 100,000 | Positive | Logistic regression, five of six statements<br>- USD 15,000-25,000 = reference category<br>- Adjusted OR= 0.52-0.64, p<0.05                                                                                                                                      |

276

|           |       |                                         |                                                                                                                |                                                                                                                                                 |                 |                                                                                                                                                                                                                                                                                                                                                                                                                                                                                                                               |
|-----------|-------|-----------------------------------------|----------------------------------------------------------------------------------------------------------------|-------------------------------------------------------------------------------------------------------------------------------------------------|-----------------|-------------------------------------------------------------------------------------------------------------------------------------------------------------------------------------------------------------------------------------------------------------------------------------------------------------------------------------------------------------------------------------------------------------------------------------------------------------------------------------------------------------------------------|
| [41]; USA | 1,114 | Adults (ø age: 44.87 years; 48% female) | 6 Statements assessing support of general and employment-specific antidiscrimination laws or policies          | Annual household income, 5 subgroups:<br>- USD < 25,000<br>- USD 25,000-49,999<br>- USD 50,000-74,999<br>- USD 75,000-99,999<br>- USD > 100,000 | <b>Positive</b> | Ordinal logistic regression<br>- USD < 25,000 = reference category<br>- Significant results among women but not men<br>“Obesity should be considered a disability under the ADA to protect obese people from weight discrimination in the workplace”<br>- USD 75,000-99,999: OR= 0.52, p<0.05<br>“Congress should pass the WDEA to protect overweight Americans from discrimination in the workplace”<br>- USD 75,000-99,999: OR= 0.49, p<0.05                                                                                |
| [37]; USA | 3,502 | Adults (age 21-65; 61.9% female)        | 3 statements assessing support of legal protection and employment-specific antidiscrimination laws or policies | Annual household income, 5 subgroups<br>- USD < 25,000<br>- USD 25,000-49,999<br>- USD 50,000-74,999<br>- USD 75,000-99,999<br>- USD > 100,000  | Mixed           | Logistic Regression Model<br>- USD 15,000-25,000 = reference category<br><br>- USD 25,000-49,999<br>- Law 1: OR=1.0, p>0.05)<br>- Law 2: OR=1.2, p>0.05)<br>- Law 3: OR=1.0, p>0.05)<br><br>- USD 50,000-74,999<br>- Law 1: OR=1.0, p>0.05)<br>- Law 2: OR=1.2, p>0.05)<br>- Law 3: OR=1.0, p>0.05)<br><br>- USD 75,000-99,999<br>- Law 1: OR=1.2, p>0.05)<br>- Law 2: OR=1.3, p>0.05)<br>- Law 3: OR=0.9, p>0.05)<br><br>- USD > 100,000<br>- Law 1: OR=0.8, p>0.05)<br>- Law 2: OR=1.0, p>0.05)<br>- Law 3: OR=0.9, p>0.05) |
| [50]; DNK | 1,003 | Citizens (age 18-65)                    | Attitudes toward weight-loss surgery & medical treatment of obesity                                            | No details reported                                                                                                                             | / /             |                                                                                                                                                                                                                                                                                                                                                                                                                                                                                                                               |

Note: <sup>1</sup> Bold characters display significant association, Positive = demonstrates greater weight bias with increasing level of income; Negative = show greater weight bias with decreasing level of income; N = sample size

1  
2  
3  
4  
5  
6  
7  
8  
9  
10  
11  
12  
13  
14  
15  
16  
17  
18  
19  
20  
21  
22  
23  
24  
25  
26  
27  
28  
29  
30  
31  
32  
33  
34  
35  
36  
37  
38  
39  
40  
41  
42  
43  
44  
45  
46

277  
278

1  
2  
3 279 Instruments  
4

5 280 The studies included were found to be heterogeneous with regard to the instruments  
6  
7 281 used (Table 3 and 4). Therefore, the study team has decided against a meta-analysis  
8  
9 282 and for a systematic narrative literature review.

10  
11 283 Educational attainment and level of income  
12

13 284 Seventeen studies were found that assessed attitudes toward obesity in association  
14  
15 285 with participants' educational attainment and/or level of income. All of these  
16  
17 286 seventeen studies reported the participants' educational attainment [10, 36–51].  
18  
19 287 Depending on the origin of the sample and the analogous countries' educational  
20  
21 288 system, categories were formed or years of educational attainment were gathered.  
22  
23 289 From seventeen studies, thirteen assessed participants' level of income [10, 36–42,  
24  
25 290 45, 46, 48–50]; therefore, income was either assessed by the annual, weekly,  
26  
27 291 household, or individual income.

27 292 Weight Bias in Form of Stigmatizing Attitudes  
28

29 293 Studies that examined either participants' stigmatizing attitudes or participants'  
30  
31 294 beliefs about the causes of obesity [10, 36, 39, 40, 43, 46–49, 51] were included.  
32  
33 295 Stigmatizing attitudes were thereby measured with instruments such as the Fat  
34  
35 296 Phobia Scale (FPS), the Universal Measure of Bias (UMB), the Weight Control/Blame  
36  
37 297 of the Antifat Attitude Test (WCB), the Attitudes to Obese People (ATOP), the Implicit  
38  
39 298 Association Test (IAT), or the Photographic Figure Rating Scale (PFRS). As  
40  
41 299 described before, beliefs about the causes of obesity in the form of evaluating obesity  
42  
43 300 as a controllable condition – which is supposedly preventable by a greater extent of  
44  
45 301 self-discipline – can consequently be seen as one decisive factor in determining  
46  
47 302 stigmatizing attitudes [52] and was therefore included. The instruments used are  
48  
49 303 presented in Table 3.  
50  
51  
52  
53  
54  
55  
56  
57  
58  
59  
60

304 **Table 3 Overview of the instruments used to measure stigmatizing attitudes**

| Instruments measuring Stigmatizing attitudes                                      | Studies that apply the instrument |
|-----------------------------------------------------------------------------------|-----------------------------------|
| <i>Explicit Stigma</i>                                                            |                                   |
| - Fat Phobia Scale (FPS)                                                          | [36, 43, 46]                      |
| - Universal Measure of Bias (UMB)                                                 | [43]                              |
| - Attitudes to Obese People (ATOP)                                                | [47, 49]                          |
| - Opinions about obesity as a disease                                             | [40]                              |
| - Photographic Figure Rating Scale (PFRS)                                         | [51]                              |
| <i>Implicit Stigma</i>                                                            |                                   |
| - Implicit Association Test (IAT)                                                 | [47]                              |
| <i>Causal Attribution</i>                                                         |                                   |
| - Weight Control/Blame of the Anti-Fat-Attitudes (WCB)                            | [10]                              |
| - Potential causes of obesity                                                     | [48]                              |
| - Individuals responsibility ("Obese people can do something about their weight") | [39]                              |

305

306 Weight Bias in the form of Discriminating Attitudes

307 We found eight studies that investigated participants' discriminating attitudes toward  
308 people with obesity [37–39, 41, 42, 44, 45, 50]. All instruments used to measure  
309 discriminating attitudes are listed in Table 4. Discrimination was measured for  
310 example, by examining policy and law support, but also the ratings on the statement  
311 "Obesity is a major burden to society in terms of healthcare costs" as well as attitudes  
312 toward weight-loss surgery and medical treatment. We found some studies [37, 38,  
313 41, 42, 44, 45] that investigated support for the same or almost identical laws or  
314 policies (Law/policy a-i). However, these items were analyzed in such heterogeneous  
315 way, for example, by merging different items into one, that a meta-analysis could not  
316 be conducted.



317 **Table 4 Overview of the instruments used to measure discriminating attitudes**

| Instrument measuring discriminating attitudes                                                                                                                                                                                        | Studies that apply the instrument |
|--------------------------------------------------------------------------------------------------------------------------------------------------------------------------------------------------------------------------------------|-----------------------------------|
| <i>Attitudes toward weight-loss surgery &amp; medical treatment</i>                                                                                                                                                                  | [50]                              |
| <i>Beliefs about obesity as a financial burden for society</i>                                                                                                                                                                       | [39]                              |
| <i>Statements measuring support/rejection of weight-related laws or policies</i>                                                                                                                                                     |                                   |
| a My country/state should include body weight in our civil rights law in order to protect people from discrimination based on their body weight                                                                                      | [37, 38, 41, 44, 45]              |
| b It should be illegal for an employer to refuse to hire a qualified person because of his or her body weight.                                                                                                                       | [37, 38, 41, 44, 45]              |
| c It should be illegal for an employer to terminate or fire a qualified employee because of his or her body weight.                                                                                                                  | [37, 38, 41, 44, 45]              |
| d Fat/overweight persons should be subject to the same legal protections and benefits offered to people with physical disabilities.                                                                                                  | [37, 38, 41, 42, 44, 45]          |
| e It should be illegal for an employer to deny a promotion or appropriate compensation to a qualified employee because of his or her body weight.                                                                                    | [37, 38, 41, 44]                  |
| f Obesity should be considered a disability (under the ADA) so that people will be protected from weight discrimination in the workplace                                                                                             | [38, 41, 44, 45]                  |
| g Congress/Government should pass the Weight Discrimination in Employment Act (WDEA) to protect overweight Americans from discrimination in the workplace/employees from discrimination in the workplace based on their body-weight. | [38, 41, 44]                      |
| h The government should play a more active role in protecting overweight people from discrimination.                                                                                                                                 | [38, 41, 42]                      |
| i It should be illegal for an employer to assign lower wages to a qualified employee because of his or her body weight.                                                                                                              | [44, 45]                          |
| j The government should have specific laws in place to protect people from weight discrimination.                                                                                                                                    | [44]                              |
| k The government should penalize (or fine) those who discriminate against persons because of their weight.                                                                                                                           | [44]                              |
| l Individual companies should have the right to determine whom to hire based on an employee's personal body weight.                                                                                                                  | [44]                              |
| m Employers should be allowed to assign different salaries to employees based on their body weight.                                                                                                                                  | [44]                              |
| n My country should pass a Healthy Workplace Law to address workplace bullying                                                                                                                                                       | [44]                              |

318

319 **Findings**

320 The studies included showed a very heterogeneous picture regarding their results.

321 Eleven out of the seventeen studies significantly associated educational attainment  
 322 (Table 5) and/or level of income (Table 6) with stigmatizing and/or discriminatory  
 323 attitudes toward people with obesity [10, 37–39, 41–46, 48].

### 324 Associations between educational attainment and weight-related stigmatization

325 We found ten studies that reported an association between educational attainment  
326 and stigmatizing attitudes, whereas only two of them [43, 48] showed a positive  
327 association between higher educational attainment and weight-related stigmatization.  
328 In addition, the study of Puhl and colleagues [43, 44] found a significant association  
329 in the Icelandic (Beta=0.160,  $p<0.05$ ), but not in the American sample. However, two  
330 German studies [10, 46] showed an inverse correlation. Both of these studies found  
331 evidence that higher education is associated with lower stigma [46] and less belief in  
332 individual responsibility [10] for an obese condition. The remaining studies did not  
333 report significant associations.

### 334 Associations between educational attainment and weight-related discrimination

335 Six studies [37–39, 41, 42, 44] reported increased discriminating attitudes with higher  
336 education. The study of Puhl and colleagues found no significant association  
337 between weight bias and educational attainment in the US sample, but did find an  
338 association in the Icelandic sample (Beta = -0.221,  $p<0.01$ ). The study of Hilbert and  
339 colleagues [45] revealed inconsistent findings: Higher education is associated with  
340 less support for general but more support for employment specific weight-related  
341 antidiscrimination laws or policies.

### 342 Associations between the level of income and weight-related stigmatization

343 We found no study that reported a significant association between the level of  
344 income and weight-related stigmatization. Associations between the level of income  
345 and weight-related discrimination

346 Four American [38, 39, 41, 42] revealed stronger weight-related discrimination with  
347 increasing income. One German study [45] found less support for general, but not for  
348 employment specific policies and laws among more affluent people. Although the  
349 study of Suh et al. [37] found a significant positive association between level of  
350 income and support for two laws and policies (law a:  $\chi^2=6.06$ ,  $p=0.01$ ; law d:  $\chi^2=3.81$ ,  
351  $p=0.05$ ), these results could not be validated by logistic regression analysis.  
352 Moreover, the assumption that discrimination, in the form of views on the funding for  
353 medical or weight-loss surgery, is somehow associated with income was not found  
354 [50].

1  
2  
3  
4  
5  
6  
7  
8  
9  
10  
11  
12  
13  
14  
15  
16  
17  
18  
19  
20  
21  
22  
23  
24  
25  
26  
27  
28  
29  
30  
31  
32  
33  
34  
35  
36  
37  
38  
39  
40  
41  
42  
43  
44  
45  
46

For peer review only

355 Table 5. Studies That Show Significant Associations Between Education Attainment and Weight-Related Stigmatization and Discrimination

| Study | Direction of correlation | Form of Weight Bias | Instrument Weight Bias                                                          | Result                                                                                                                                                        | Adjusted for                                                                                                                                                                          |
|-------|--------------------------|---------------------|---------------------------------------------------------------------------------|---------------------------------------------------------------------------------------------------------------------------------------------------------------|---------------------------------------------------------------------------------------------------------------------------------------------------------------------------------------|
| [46]  | Negative                 | Stigmatization      | Short-FPS                                                                       | Higher educational attainment is associated with lower stigmatizing attitudes                                                                                 | Gender, age, income, residence, emigrational background                                                                                                                               |
| [10]  | Negative                 | Stigmatization      | WCB                                                                             | Higher educational attainment is associated with less stigmatizing attitudes (P<0.001)                                                                        | Causal attributions to behavior, Labeling obesity as an illness, Age, Causal attributions to heredity                                                                                 |
| [43]  | Positive                 | Stigmatization      | UMB-Fat                                                                         | Higher educational attainment is associated with higher stigmatizing attitudes (ISL sample; P<0.05)                                                           | Gender, race/ethnicity, BMI, perceived causes of obesity, weight-related attributions                                                                                                 |
| [48]  | Positive                 | Stigmatization      | Beliefs about the causes of obesity                                             | Higher educational attainment is associated with greater belief in individual responsibility (P<0.001)                                                        | Unadjusted                                                                                                                                                                            |
| [39]  | Positive                 | Discrimination      | Belief in obesity as a financial burden for society                             | Higher educational attainment is associated with greater belief in the statement "Obesity is a major burden to society in terms of healthcare costs" (P<0.01) | Race/ethnicity, sex, income, employment, age group, marital status, BMI, smoking status                                                                                               |
| [37]  | Positive                 | Discrimination      | Support for weight-related laws or policies                                     | Higher educational attainment is associated with lower support for weight-related laws or policies (P<0.01)                                                   | Other socio-demographic variables                                                                                                                                                     |
| [44]  | Positive                 | Discrimination      | Support for weight-related laws or policies                                     | Higher educational attainment is associated with less support for weight-related laws or policies (P<0.01)                                                    | Sex, age, race/ethnicity, BMI                                                                                                                                                         |
| [38]  | Positive                 | Discrimination      | Support for weight-related laws or policies                                     | Higher educational attainment is associated with lower support for weight-related laws or policies                                                            | Sex, body weight, age, income, race, political affiliation, history of weight-based victimization                                                                                     |
| [42]  | Positive                 | Discrimination      | Support for civil protections for the obese                                     | Higher educational attainment is associated with lower support for civil protection of the obese                                                              | Sex, age, BMI, race/ethnicity, income, political orientation, perceived causes for obesity                                                                                            |
| [41]  | Positive                 | Discrimination      | Support for general and employment specific antidiscrimination laws or policies | Higher educational attainment is associated with less support for weight-related laws or policies                                                             | Body weight, age, race, political affiliation, income, history of weight-based discrimination, divergent vignettes describing obesity and obesity-related (workplace) discriminations |
| [45]  | Positive                 | Discrimination      | Support for general antidiscrimination laws or policies                         | Higher educational attainment is associated with less support for general antidiscrimination laws or policies                                                 | Sex, age, weights status, income, residence, church membership, readiness to vote in following week, weight-based victimization, weight bias internalization                          |
|       | Negative                 |                     | Support for employment-specific antidiscrimination laws or policies             | Higher educational attainment is associated with stronger support for employment specific antidiscrimination laws or policies                                 |                                                                                                                                                                                       |

Positive = demonstrates greater weight bias with increasing educational attainment; Negative = show greater weight bias with decreasing educational attainment

356 Table 6 Studies That Show Significant Associations Between Level of Income and Weight-Related Stigmatization and Discrimination

| Study | Direction of correlation | Form of Weight Bias | Instrument Weight Bias                                                          | Result                                                                                                                                                 | Adjusted for                                                                                                                                                                             |
|-------|--------------------------|---------------------|---------------------------------------------------------------------------------|--------------------------------------------------------------------------------------------------------------------------------------------------------|------------------------------------------------------------------------------------------------------------------------------------------------------------------------------------------|
| [39]  | Positive                 | Discrimination      | Belief in obesity as a burden for society                                       | Yes; A higher income level is associated with greater belief in statement "Obesity is a major burden to society in terms of healthcare costs" (P<0.05) | Race/ethnicity, sex, education, employment, age group, marital status, BMI, smoking status                                                                                               |
| [38]  | Positive                 | Discrimination      | Support for weight-related laws or policies                                     | Higher income is associated with lower support for weight-related laws or policies                                                                     | Sex, body weight, age, education, income, race, political affiliation, history of weight-based victimization                                                                             |
| [42]  | Positive                 | Discrimination      | Support for civil protections for the obese                                     | Higher income is associated with lower support for civil protection of the obese                                                                       | Sex, age, BMI, race/ethnicity, education, political orientation, perceived causes for obesity                                                                                            |
| [41]  | Positive                 | Discrimination      | Support for general and employment specific antidiscrimination laws or policies | Higher income is associated with less support for weight-related laws or policies                                                                      | Body weight, age, race, political affiliation, education, history of weight-based discrimination, divergent vignettes describing obesity and obesity-related (workplace) discriminations |
| [45]  | Positive                 | Discrimination      | Support for general antidiscrimination laws or policies                         | Higher income is associated with less support for general antidiscrimination laws or policies                                                          | Sex, age, weights status, education, residence, church membership, readiness to vote in following week, weight-based victimization, weight bias internalization                          |

Positive = demonstrates greater weight bias with increasing level of income; Negative = show greater weight bias with decreasing level of income

For peer review only

## 358 Discussion

359 This systematic literature review aimed to summarize the current state of research on  
360 socioeconomic status and its impact on weight-related stigmatization and  
361 discrimination. As it was outlined earlier, the association between socioeconomic  
362 factors and weight bias has not been investigated sufficiently [41]. This review aimed  
363 therefore to address this gap. Although many studies were found that investigated  
364 various forms of weight bias and assessed socioeconomic data, an association was  
365 only reported in 17 studies. The underlying reason why an association was not  
366 reported might be a different research focus, but also insignificant findings. Overall,  
367 eleven out of the seventeen studies showed that weight bias is significantly  
368 associated with either educational attainment or level of income. In the following the  
369 results are discussed separated by education and income, as well as weight-related  
370 stigmatization and discrimination.

### 371 Educational Attainment, Level of Income, and Stigmatizing Attitudes

372 Overall, ten studies reported an association between educational attainment and  
373 stigmatizing attitudes. However, we found no systematic pattern in which way  
374 educational attainment and stigmatizing attitudes are associated: Two studies [43,  
375 48] supported the hypothesis that stigmatizing attitudes are more likely in people with  
376 higher educational attainment, whereas two German studies [10, 46] contradict this.  
377 Moreover, six studies [36, 39, 40, 47, 49, 51] did not show any significant association,  
378 nor a clear direction of the assumed association. In light of divergent results of  
379 studies that report a significant association between socioeconomic variables and  
380 stigmatizing attitudes, the findings must be discussed with regard to their cultural  
381 context: American, Mexican, and Icelandic studies were found to support the working  
382 hypothesis, whereas two German studies [10, 46] revealed findings to the contrary.  
383 These differences might be explained when considering cultural distinctions. In  
384 cultures, in which individual responsibility is considered as one of the leading causes  
385 of self-fulfillment, health, and wealth, obesity might be perceived as a self-inflicted  
386 condition. Highly educated people might attempt to keep people down to maintain  
387 their high(er) social status. In contrast, in cultures in which individuals' situations are  
388 principally considered as a result of various circumstances, obesity might

1  
2  
3 389 consequently not only be seen as self-inflicted. In these cultures, especially highly  
4  
5 390 educated people might be aware of social barriers as determinants for self-fulfillment,  
6  
7 391 wealth, and health, i.e., body weight. In conclusion, the direction of the relationship  
8  
9 392 between weight bias and socioeconomic status might depend on divergent socio-  
10  
11 393 cultural perspectives. Hence, future research should consider expansion and  
12  
13 394 reorientation of stigma's theoretical framework by focusing on the meso and macro  
14  
15 395 socio-cultural structures, as Bonnington and Rose [53] suggest.  
16

396

17 397 Overall, we found eight studies that investigated (or rather reported) the association  
18  
19 398 between level of income and stigmatizing attitudes. None of these studies showed a  
20  
21 399 significant relationship. However, the direction of the (insignificant) associations did  
22  
23 400 not show any pattern. We found three studies reporting an (insignificant) positive  
24  
25 401 association [10, 39, 48], and one study each reporting an (insignificant) positive [49]  
26  
27 402 or mixed associations [40].

#### 28 403 Educational Attainment, Level of Income, and Discriminating Attitudes

29  
30 404 Of the seventeen studies included, eight studies were found that reported an  
31  
32 405 association between educational attainment and discriminating attitudes. Five of  
33  
34 406 these studies reported a positive relationship, i.e., stronger discriminating attitudes (in  
35  
36 407 the form of law and policy support) with increasing education. Another study [44] that  
37  
38 408 applied the same instruments for an American and an Icelandic sample found only  
39  
40 409 indications for our assumption (i.e., higher education is associated with stronger  
41  
42 410 discriminating attitudes) in the Icelandic, but not in the American sample. This study  
43  
44 411 [44] was also replicated by Hilbert et al. [45], who report heterogeneous findings as  
45  
46 412 they found less support for general antidiscrimination laws with increasing level of  
47  
48 413 education, but stronger support for employment specific laws and policies among the  
49  
50 414 higher educated German sample. It should, therefore, be discussed whether general  
51  
52 415 and employment specific antidiscrimination policies and laws can be viewed as  
53  
54 416 similar outcomes or if they display different dimensions of discrimination. Moreover,  
55  
56 417 views on who should pay for medical treatment or weight-loss surgery did not reveal  
57  
58 418 significant associations [50]. Only one study [50] did not find a significant  
59  
60 419 association between educational attainment and discriminating attitudes, nor did it  
420 report the direction of the insignificant association.

1  
2  
3 421 With regard to the association between level of income and discriminating attitudes  
4  
5 422 we found overall seven studies in which an association was reported. Five studies  
6  
7 423 [38, 39, 41, 42, 45] reported positive relationships, i.e., stronger discriminating  
8  
9 424 attitudes with an increasing level of income. Suh et al. [37] found a significant  
10  
11 425 association of stronger support for weight-related laws with decreasing income until  
12  
13 426 they controlled for other sociodemographic variables, such as educational attainment.  
14  
15 427 They reported mixed (insignificant) results concerning the direction of the assumed  
16  
17 428 association. A possible explanation for these insignificant results after controlling for  
18  
19 429 education might be that income can be seen as a proxy variable for education, in the  
20  
21 430 way that the level of income depends on educational attainment. Again, Lund and  
22  
23 431 colleagues [50] who asked Danish citizen by whom medical treatment and weight-  
24  
25 432 loss surgery should be funded, found no significant association, nor did they report a  
26  
27 433 direction of the association.

28  
29 434 These findings support our assumption that higher socioeconomic status is  
30  
31 435 associated with stronger discriminating attitudes. However, one German study [45]  
32  
33 436 reported contradicting results that might be ascribed at a macro level to Bourdieu's  
34  
35 437 theory about how cultural frameworks determine how specific values and  
36  
37 438 characteristics are perceived. Governmental structures might enforce stigmatizing  
38  
39 439 and discriminating attitudes as an instrument to 'nudge people into desired patterns  
40  
41 440 of behavior' [29]. It can be assumed that cultural frameworks shape governmental  
42  
43 441 systems and are strengthened at the same time through them, especially through the  
44  
45 442 national health and welfare systems. Tyler and Slater [29], for example, outline the  
46  
47 443 political and social function of stigma as a form of power. They discuss macro-level  
48  
49 444 structures, particularly those used actively and passively by governments, as  
50  
51 445 determinants shaping stigmatizing and discriminating attitudes, a level of  
52  
53 446 understanding often left out in social psychology. As explained above, it might be  
54  
55 447 possible that in countries in which obesity is merely perceived as self-inflicted,  
56  
57 448 discriminating attitudes might be stronger - Hence, stigma is not only an instrument  
58  
59 449 used by individuals to enforce personal interests but also one put in place (intended  
60  
61 450 or not) by governments.



1  
2  
3 451 The different and to some extent inconclusive results might be caused by diverging  
4  
5 452 study designs, sample sizes, and instruments assessing weight-related stigmatization  
6  
7 453 and discrimination, educational attainment, and level of income: Studies that did not  
8  
9 454 show a significant association between weight bias and either educational attainment  
10  
11 455 or level of income excluded the overweight portion of the sample [36] or were  
12  
13 456 characterized by a small sample (ranging from n=198 to n=396) size [36, 47, 51].  
14  
15 457 Furthermore, the association between weight bias with either educational attainment  
16  
17 458 or level of income were not seen in instruments such as the Attitudes to Obese  
18  
19 459 People scale (ATOP) [47, 49], the Implicit Association Test (IAT) [47] agreement  
20  
21 460 ratings as to whether obesity can be classified as a disease [40], and measurement  
22  
23 461 of attitudes toward weight-loss surgery and medical treatment [50].  
24  
25 462

26 463 However, there are findings diminishing this line of argument: The study of Hilbert et  
27  
28 464 al. [45] found less support for general, but stronger support for employment specific  
29  
30 465 laws with increasing socioeconomic status. In addition, the German population was  
31  
32 466 found to be less supportive of laws and policies that would impede to refuse to hire,  
33  
34 467 assign lower wages, and to fire qualified persons because of their body weight,  
35  
36 468 compared to an American and Icelandic sample [44]. Moreover, the German  
37  
38 469 population was less supportive of including body weight in the civil rights of law  
39  
40 470 compared to the American, but not the Icelandic sample.

41  
42 471 A final point of discussion might be whether the prevalence of obesity has an impact  
43  
44 472 on the magnitude of weight bias. When comparing the prevalence and the  
45  
46 473 stigmatization of obesity between the USA and Germany, for example, the following  
47  
48 474 can be stated: In both countries, the prevalence of obesity increased over time (1995,  
49  
50 475 USA 21.9%; GER 14.5%; 2005 USA 29%; GER 18%) [54]. However, not only the  
51  
52 476 prevalence of obesity itself increased, but also the (perceived) stigmatization toward  
53  
54 477 people with obesity in the US but also in Germany [7, 8, 10, 55].  
55  
56  
57  
58  
59  
60

1  
2  
3 478 Limitations  
4

5 479 Just as any overview must contend with heterogeneous samples and instruments,  
6 480 this systematic review has likewise attempted to cope with varying data. The studies  
7 481 reviewed differed with respect to the instruments used to assess education and  
8 482 income. In particular, the measurement of educational attainment was strongly  
9 483 influenced by the different organization and structure of the varied local educational  
10 484 systems. In addition, the instruments to assess weight bias were also heterogeneous,  
11 485 particularly those used to measure stigmatizing attitudes. Some studies used  
12 486 validated scales, whereas other studies used single items only. Thus, the manner of  
13 487 gathering data and classifying categories can be described as heterogeneous itself –  
14 488 and therefore caused the study team to decide against a meta-analysis. However,  
15 489 studies that did use the same instrument, such as items weighing support for specific  
16 490 laws and policies differed with regard to how they were analyzed (as single items or  
17 491 as an item battery). Therefore, the authors had to decide again against a meta-  
18 492 analysis and applied a vote-counting approach despite its shortcomings.

19 493 Moreover, the study aimed to investigate socioeconomic determinants of weight bias  
20 494 in the general population, as discussed in the inclusion and exclusion section.  
21 495 Therefore, we excluded, among other things, studies that focused on overweight  
22 496 and/or obese samples only. We assumed that people try to differentiate themselves  
23 497 from lower status groups, which might be characterized by varying body sizes, i.e.,  
24 498 excess weight or obesity. However, overweight and obese samples were included as  
25 499 part of the general population in some studies. Also, these studies did not  
26 500 differentiate their results by participants' body sizes. We also excluded studies based  
27 501 on homogenous samples, such as health care professionals and students. We  
28 502 considered these studies as inadequate since there would have been no possibility to  
29 503 compare and thus interpret these results with regard to the research question.  
30 504 Moreover, stigmatizing attitudes among some professions, such as dietitians and  
31 505 nutritionists, were already investigated systematically.

32 506 In the general population, we assume that people try to differentiate themselves not  
33 507 only by socioeconomic status but by other status markers as well, such as excess  
34 508 weight. Although we attempted to explain the heterogeneous and inconclusive results  
35  
36  
37  
38  
39  
40  
41  
42  
43  
44  
45  
46  
47  
48  
49  
50  
51  
52  
53  
54  
55  
56  
57  
58  
59  
60

1  
2  
3 509 by appealing to governmental and cultural differences, there was insufficient (and  
4  
5 510 also inconclusive) evidence to conclude the role of cultural and governmental  
6  
7 511 structures on weight bias.

8  
9 512 Since the study team has only sufficient language skills in English and German, the  
10  
11 513 current research includes only papers written in English or German

## 12 13 514 **Conclusion**

14  
15 515 The literature review aimed to investigate to what extent weight bias can be traced  
16  
17 516 back to socioeconomic variables, such as educational attainment and level of  
18  
19 517 income. We assumed that a higher level of education or income is associated with  
20  
21 518 greater stigmatization and discrimination. Therefore, the current study situation was  
22  
23 519 analyzed systematically. Although data of education and income are always collected  
24  
25 520 as mandatory sociodemographic information, research is lacking when it comes to  
26  
27 521 examining their impact on weight bias. Since this question has not yet been  
28  
29 522 answered sufficiently, this review was supposed to address this gap in research and  
30  
31 523 aimed to contribute to closing this gap.

32  
33 524  
34 525 Our working hypothesis that weight bias increases with higher educational attainment  
35  
36 526 or level of income could not be verified. Particularly, we found eight studies that  
37  
38 527 supported our hypothesis, two German studies indicating the reverse conclusion, one  
39  
40 528 German study reported heterogenous findings and seven studies that did not show a  
41  
42 529 significant association at all.

43  
44 530  
45 531 The key to identifying effective interventions to battle stigmatization, discrimination,  
46  
47 532 and consequences for those affected might lie in exposing the characteristics of  
48  
49 533 stigmatizing groups and their motivations. Therefore, future research should pay  
50  
51 534 more attention to the link between weight bias and socioeconomic factors and  
52  
53 535 cultural or rather governmental structures. Moreover, meta-analysis should be  
54  
55 536 considered as an important direction for future research.

1  
2  
3 **537 Figure legends**

4  
5 538 Figure 1. Phases of the systematic review

6  
7  
8 **539 Supplementary Material**

9  
10 540 Supplementary Material 1. Risk of Bias Assessment

11  
12 **541 Funding Sources**

13  
14 542 This study was supported by the Federal Ministry of Education and Research  
15 543 (BMBF), Germany, FKZ: 01EO1501. The funding source had no involvement in study  
16 544 design, collection, analysis, and interpretation of data. Furthermore, we acknowledge  
17 545 support from the German Research Foundation (DFG) and University Leipzig within  
18 546 the program of Open Access Publishing.

19  
20  
21 **547 Disclosure Statement**

22  
23  
24 548 The authors have no conflicts of interest to declare.

25  
26  
27 **549 Author contributions**

28  
29 550 MB, CLS, and SRH outlined and specified the research question. MB and CLS  
30 551 conducted the systematic search of the literature. Furthermore, MB, CLS, and TF  
31 552 discussed papers in detail in case of disagreement and uncertainty over the eligibility  
32 553 of abstracts. MB wrote the first draft of the manuscript. TF, SRH, and CLS revised it  
33 554 critically for valuable intellectual content. All authors contributed to and have  
34 555 approved the final manuscript.

35  
36  
37 556

38  
39  
40  
41  
42  
43 **557 Data sharing statement**

44  
45 558 No unpublished data is available following this study.  
46  
47  
48  
49  
50  
51  
52  
53  
54  
55  
56  
57  
58  
59  
60

## 559 REFERENCES

- 560 1 World Health Organization. Obesity and overweight 2018. Available at:  
561 <http://www.who.int/en/news-room/fact-sheets/detail/obesity-and-overweight> Accessed  
562 August 27, 2018.
- 563 2 Mensink G, Schienkiewitz A, Scheidt-Nave C. Overweight and obesity in Germany: Results of the  
564 German Health Interview and Examination Survey for Adults. *Bundesgesundheitsblatt -*  
565 *Gesundheitsforschung - Gesundheitsschutz* 2013;786–94.
- 566 3 Flegal KM, Kruszon-Moran D, Carroll MD, et al. Trends in Obesity Among Adults in the United  
567 States, 2005 to 2014. *JAMA* 2016;315(21):2284–91.
- 568 4 Pi-Sunyer X. The medical risks of obesity. *Postgrad Med* 2009;121(6):21–33.
- 569 5 Jung FUCE, Luck-Sikorski C, Wiemers N, et al. Dietitians and Nutritionists: Stigma in the Context  
570 of Obesity. A Systematic Review. *PLoS One* 2015;10(10):e0140276.
- 571 6 Puhl RM, Heuer CA. The stigma of obesity: a review and update. *Obesity (Silver Spring)*  
572 2009;17(5):941–64.
- 573 7 Andreyeva T, Puhl RM, Brownell KD. Changes in perceived weight discrimination among  
574 Americans, 1995-1996 through 2004-2006. *Obesity (Silver Spring)* 2008;16(5):1129–34.
- 575 8 Spahlholz J, Baer N, König H-H, et al. Obesity and discrimination - a systematic review and  
576 meta-analysis of observational studies. *Obes Rev* 2016;17(1):43–55.
- 577 9 Puhl RM, Andreyeva T, Brownell KD. Perceptions of weight discrimination: prevalence and  
578 comparison to race and gender discrimination in America. *Int J Obes (Lond)* 2008;32(6):992–  
579 1000.
- 580 10 Hilbert A, Rief W, Braehler E. Stigmatizing attitudes toward obesity in a representative  
581 population-based sample. *Obesity (Silver Spring)* 2008;16(7):1529–34.
- 582 11 Rand CS, Wright BA. Continuity and change in the evaluation of ideal and acceptable body sizes  
583 across a wide age span. *Int J Eat Disord* 2000;28(1):90–100.
- 584 12 Schwartz MB, Chambliss HO, Brownell KD, et al. Weight bias among health professionals  
585 specializing in obesity. *Obes Res* 2003;11(9):1033–39.
- 586 13 Crandall CS. Prejudice against fat people: ideology and self-interest. *J Pers Soc Psychol*  
587 1994;66(5):882–94.
- 588 14 Puhl RM, Schwartz MB, Brownell KD. Impact of perceived consensus on stereotypes about  
589 obese people: a new approach for reducing bias. *Health Psychol* 2005;24(5):517–25.
- 590 15 Latner JD, Stunkard AJ, Wilson GT. Stigmatized students: age, sex, and ethnicity effects in the  
591 stigmatization of obesity. *Obes Res* 2005;13(7):1226–31.
- 592 16 Perez-Lopez MS, Lewis RJ, Cash TF. The Relationship of Antifat Attitudes to Other Prejudicial  
593 and Gender-Related Attitudes1. *J Appl Social Psychol* 2001;31(4):683–97.
- 594 17 Link BG, Phelan J. Stigma power. *Soc Sci Med* 2014;103:24–32.
- 595 18 McLaren L. Socioeconomic status and obesity. *Epidemiol Rev* 2007;29:29–48.
- 596 19 Brewis AA, McGarvey ST, Jones J, et al. Perceptions of body size in Pacific Islanders. *Int J Obes*  
597 1998;22(2):185–89.
- 598 20 Brewis AA, Wutich A, Falletta-Cowden A, et al. Body Norms and Fat Stigma in Global  
599 Perspective. *Current Anthropology* 2011;52(2):269–76.

- 1  
2  
3 600 21 Flint SW, Cadek M, Codreanu SC, et al. Obesity Discrimination in the Recruitment Process:  
4 601 "You're Not Hired!". *Front Psychol* 2016;7:647.
- 5 602 22 Agerstrom J, Rooth D-O. The role of automatic obesity stereotypes in real hiring discrimination.  
6 603 *J Appl Psychol* 2011;96(4):790–805.
- 7 604 23 Puhl R, Brownell KD. Bias, discrimination, and obesity. *Obes Res* 2001;9(12):788–805.
- 8 605 24 Flaskerud JH, DeLilly CR. Social determinants of health status. *Issues Ment Health Nurs*  
9 606 2012;33(7):494–97.
- 10 607 25 Bourdieu P. *Distinction: A social critique of the judgement of taste*, 1984th edn. Cambridge,  
11 608 Mass.: Harvard University Press 2000.
- 12 609 26 Cockerham WC. Health lifestyle theory and the convergence of agency and structure. *Journal of*  
13 610 *Health and Social Behavior* 2005;46(1):51–67.
- 14 611 27 Bourdieu P. What Makes a Social Class? On The Theoretical and Practical Existence Of Groups.  
15 612 *Berkeley Journal of Sociology* 1987;32:1–17.
- 16 613 28 Phelan JC, Link BG, Dovidio JF. Stigma and prejudice: one animal or two? *Soc Sci Med*  
17 614 2008;67(3):358–67.
- 18 615 29 Tyler I, Slater T. Rethinking the sociology of stigma. *The Sociological Review* 2018;66(4):721–43.
- 19 616 30 Moher D, Liberati A, Tetzlaff J, et al. Preferred reporting items for systematic reviews and meta-  
20 617 analyses: the PRISMA statement. *BMJ* 2009;339:b2535.
- 21 618 31 Howard C. Subject & Course Guides: Evidence Based Medicine: PICO. Available at:  
22 619 <https://researchguides.uic.edu/c.php?g=252338&p=3954402>. Accessed August 14, 2019.
- 23 620 32 Puhl RM, Latner JD. Stigma, obesity, and the health of the nation's children. *Psychological*  
24 621 *Bulletin* 2007;133(4):557–80.
- 25 622 33 Woolford SJ, Clark SJ, Butchart A, et al. To pay or not to pay: public perception regarding  
26 623 insurance coverage of obesity treatment. *Obesity (Silver Spring)* 2013;21(12):E709-14.
- 27 624 34 Biener A, Cawley J, Meyerhoefer C. The High and Rising Costs of Obesity to the US Health Care  
28 625 System. *J Gen Intern Med* 2017;32(Suppl 1):6–8.
- 29 626 35 Downes MJ, Brennan ML, Williams HC, et al. Development of a critical appraisal tool to assess  
30 627 the quality of cross-sectional studies (AXIS). *BMJ open* 2016;6(12):e011458.
- 31 628 36 Lippa NC, Sanderson SC. Impact of information about obesity genomics on the stigmatization of  
32 629 overweight individuals: an experimental study. *Obesity (Silver Spring)* 2012;20(12):2367–76.
- 33 630 37 Suh Y, Puhl R, Liu S, et al. Support for laws to prohibit weight discrimination in the United  
34 631 States: public attitudes from 2011 to 2013. *Obesity (Silver Spring)* 2014;22(8):1872–79.
- 35 632 38 Puhl RM, Heuer CA. Public opinion about laws to prohibit weight discrimination in the United  
36 633 States. *Obesity (Silver Spring)* 2011;19(1):74–82.
- 37 634 39 Seo D-C, Torabi MR. Racial/ethnic differences in body mass index, morbidity and attitudes  
38 635 toward obesity among U.S. adults. *J Natl Med Assoc* 2006;98(8):1300–08.
- 39 636 40 Puhl RM, Liu S. A national survey of public views about the classification of obesity as a disease.  
40 637 *Obesity (Silver Spring)* 2015;23(6):1288–95.
- 41 638 41 Puhl RM, Heuer C, Sarda V. Framing messages about weight discrimination: impact on public  
42 639 support for legislation. *Int J Obes (Lond)* 2011;35(6):863–72.
- 43 640 42 Oliver JE, Lee T. Public Opinion and the Politics of Obesity in America. *Journal of Health Politics,*  
44 641 *Policy and Law* 2005;30(5):923–54.
- 45  
46  
47  
48  
49  
50  
51  
52  
53  
54  
55  
56  
57  
58  
59  
60

- 1  
2  
3 642 43 Puhl RM, Latner JD, O'Brien K, et al. A multinational examination of weight bias: predictors of  
4 643 anti-fat attitudes across four countries. *Int J Obes (Lond)* 2015;39(7):1166–73.
- 5 644 44 Puhl RM, Latner JD, O'Brien KS, et al. Potential Policies and Laws to Prohibit Weight  
6 645 Discrimination: Public Views from 4 Countries. *Milbank Q* 2015;93(4):691–731.
- 7 646 45 Hilbert A, Hübner C, Schmutzer G, et al. Public Support for Weight-Related Antidiscrimination  
8 647 Laws and Policies. *Obes Facts* 2017;10(2):101–11.
- 9 648 46 Sikorski C, Luppá M, Brahler E, et al. Obese children, adults and senior citizens in the eyes of the  
10 649 general public: results of a representative study on stigma and causation of obesity. *PLoS One*  
11 650 2012;7(10):e46924.
- 12 651 47 Brewis AA, Wutich A. Explicit versus implicit fat-stigma. *Am J Hum Biol* 2012;24(3):332–38.
- 13 652 48 Jimenez-Cruz A, Escobar-Aznar YM de, Castillo-Ruiz O, et al. Beliefs about causes and  
14 653 consequences of obesity among women in two Mexican cities. *J Health Popul Nutr*  
15 654 2012;30(3):311–16.
- 16 655 49 Hansson LM, Rasmussen F. Attitudes towards obesity in the Swedish general population: the  
17 656 role of one's own body size, weight satisfaction, and controllability beliefs about obesity. *Body*  
18 657 *Image* 2014;11(1):43–50.
- 19 658 50 Lund TB, Nielsen MEJ, Sandoe P. In a class of their own: the Danish public considers obesity less  
20 659 deserving of treatment compared with smoking-related diseases. *Eur J Clin Nutr*  
21 660 2015;69(4):514–18.
- 22 661 51 Swami V, Monk R. Weight bias against women in a university acceptance scenario. *J Gen*  
23 662 *Psychol* 2013;140(1):45–56.
- 24 663 52 Gorman MJ, Butsch WS, Reilly-Harrington NA, et al. Stigma In Persons with Obesity. In: Parekh  
25 664 R, Childs EW, eds. *Stigma and Prejudice: Touchstones in Understanding Diversity in Healthcare*.  
26 665 Cham: Springer International Publishing 2016:23–40.
- 27 666 53 Bonnington O, Rose D. Exploring stigmatisation among people diagnosed with either bipolar  
28 667 disorder or borderline personality disorder: A critical realist analysis. *Soc Sci Med* 2014;123:7–  
29 668 17.
- 30 669 54 World Health Organization. Overweight and obesity. Available at:  
31 670 [https://www.who.int/gho/ncd/risk\\_factors/overweight\\_obesity/obesity\\_adults/en/](https://www.who.int/gho/ncd/risk_factors/overweight_obesity/obesity_adults/en/) Accessed  
32 671 August 14, 2019.
- 33 672 55 Herpertz S, Zwaan M, Zipfel S. *Handbuch Essstörungen und Adipositas*. Berlin, Heidelberg:  
34 673 Springer Berlin Heidelberg 2015.
- 35  
36  
37  
38  
39  
40  
41  
42  
43  
44  
45  
46  
47  
48  
49  
50  
51  
52  
53  
54  
55  
56  
57  
58  
59  
60

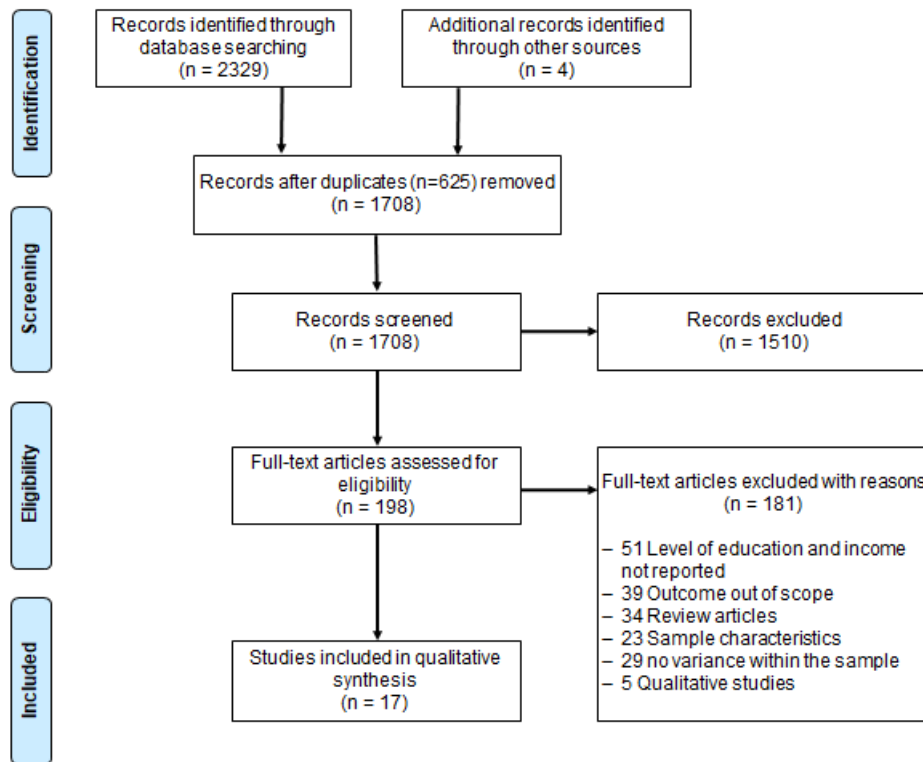

Figure 1 Phases of the systematic review

Peer review only



|  |                       |
|--|-----------------------|
|  | Low risk of bias      |
|  | Moderate risk of bias |
|  | High risk of bias     |
|  | Not reported          |

### Supplementary Material 1. Assessment of Risk of Bias

|                               | 1   | 2        | 3   | 4   | 5        | 6    | 7   | 8        | 9    | 10  | 11       | 12       | 13       | 14   | 15       | 16       | 17       | 18       | 19  | 20  |
|-------------------------------|-----|----------|-----|-----|----------|------|-----|----------|------|-----|----------|----------|----------|------|----------|----------|----------|----------|-----|-----|
| (Brewis and Wutich, 2012)     | Low | Low      | Not | Low | High     | High | Not | Low      | Low  | Low | Low      | Moderate | Not      | High | Not      | Low      | Low      | Moderate | Not | Low |
| (Hansson and Rasmussen, 2014) | Low | Low      | Not | Low | Moderate | High | Not | Low      | Low  | Low | Low      | Moderate | Not      | High | Moderate | Low      | Low      | Low      | Not | Low |
| (Hilbert et al., 2017)        | Low | Low      | Not | Low | Low      | Low  | Not | Low      | Low  | Low | Low      | Low      | Not      | High | Moderate | Low      | Low      | Low      | Not | Low |
| (Jimenez-Cruz et al., 2012)   | Low | Low      | Not | Low | High     | High | Not | Moderate | Low  | Low | Moderate | Low      | Not      | High | Moderate | Moderate | Moderate | Moderate | Not | Low |
| (Lippa and Sanderson, 2012)   | Low | Moderate | Not | Low | Moderate | High | Not | Low      | Low  | Low | Low      | Low      | Not      | High | Low      | Low      | Low      | Low      | Not | Low |
| (Lund et al., 2015)           | Low | Low      | Not | Low | Moderate | High | Not | High     | High | Low | Moderate | Moderate | Not      | High | Low      | Low      | Low      | Low      | Not | Low |
| (Oliver and Lee, 2005)        | Low | Low      | Not | Low | Low      | Low  | Not | Not      | Not  | Low | Low      | High     | Moderate | High | Low      | Low      | Low      | High     | Not | Low |
| (Puhl et al., 2011)           | Low | Low      | Not | Low | Low      | Low  | Not | Low      | Low  | Low | Low      | Low      | Not      | High | Low      | Low      | Low      | Low      | Not | Low |
| (Puhl et al., 2015)           | Low | Low      | Not | Low | Low      | Low  | Not | Low      | Low  | Low | Low      | Low      | Not      | High | Low      | Low      | Low      | Low      | Not | Low |
| (Puhl and Heuer, 2011)        | Low | Low      | Not | Low | Low      | Low  | Not | Low      | Low  | Low | Low      | Low      | Not      | High | Not      | Low      | Low      | Low      | Not | Low |
| (Puhl et al., 2015)           | Low | Low      | Not | Low | Low      | Low  | Not | Low      | Low  | Low | Low      | Low      | Not      | High | Low      | Low      | Low      | Low      | Not | Low |
| (Puhl and Liu, 2015)          | Low | Low      | Not | Low | Low      | Low  | Not | High     | Low  | Low | Low      | Low      | Not      | High | Low      | Low      | Low      | Low      | Not | Low |
| (Seo and Torabi, 2006)        | Low | Low      | Not | Low | Low      | Low  | Not | Not      | Not  | Low | Low      | Moderate | Not      | Low  | Not      | Low      | Low      | Low      | Not | Low |
| (Sikorski et al., 2012)       | Low | Low      | Not | Low | Low      | Low  | Not | Low      | Low  | Low | Low      | Moderate | Not      | High | Low      | Low      | Low      | Low      | Not | Low |
| (Suh et al., 2014)            | Low | Low      | Not | Low | Moderate | Low  | Not | Low      | Low  | Low | Low      | Low      | Not      | High | Low      | Low      | Low      | Low      | Not | Low |
| (Swami and Monk, 2013)        | Low | Low      | Not | Low | High     | High | Not | Low      | Low  | Low | Low      | Moderate | Not      | High | Low      | Low      | Low      | Low      | Not | Low |

#### AXIS – Tool to assess the quality of cross-sectional studies (Downes et al., 2016)

1. Were the aims/objectives of the study clear?
2. Was the study design appropriate for the stated aim(s)?
3. Was the sample size justified?
4. Was the target/reference population clearly defined? (Is it clear who the research was about?)
5. Was the sample frame taken from an appropriate population base so that it closely represented the target/reference population under investigation?
6. Was the selection process likely to select subjects/participants that were representative of the target/reference population under investigation?
7. Were measures undertaken to address and categorise non-responders?
8. Were the risk factor and outcome variables measured appropriate to the aims of the study?
9. Were the risk factor and outcome variables measured correctly using instruments/measurements that had been trialled, piloted or published previously?
10. Is it clear what was used to determine statistical significance and/or precision estimates? (eg, p values, CIs)
11. Were the methods (including statistical methods) sufficiently described to enable them to be repeated?
12. Were the basic data adequately described?
13. Does the response rate raise concerns about non-response bias?
14. If appropriate, was information about non-responders described?
15. Were the results internally consistent?
16. Were the results for the analyses described in the methods, presented?
17. Were the authors' discussions and conclusions justified by the results?
18. Were the limitations of the study discussed?
19. Were there any funding sources or conflicts of interest that may affect the authors' interpretation of the results?
20. Was ethical approval or consent of participants attained?

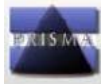

# PRISMA 2009 Checklist

| Section/topic                      | #  | Checklist item                                                                                                                                                                                                                                                                                              | Reported on page # |
|------------------------------------|----|-------------------------------------------------------------------------------------------------------------------------------------------------------------------------------------------------------------------------------------------------------------------------------------------------------------|--------------------|
| <b>TITLE</b>                       |    |                                                                                                                                                                                                                                                                                                             |                    |
| Title                              | 1  | Identify the report as a systematic review, meta-analysis, or both.                                                                                                                                                                                                                                         | 1                  |
| <b>ABSTRACT</b>                    |    |                                                                                                                                                                                                                                                                                                             |                    |
| Structured summary                 | 2  | Provide a structured summary including, as applicable: background; objectives; data sources; study eligibility criteria, participants, and interventions; study appraisal and synthesis methods; results; limitations; conclusions and implications of key findings; systematic review registration number. | 2                  |
| <b>INTRODUCTION</b>                |    |                                                                                                                                                                                                                                                                                                             |                    |
| Rationale                          | 3  | Describe the rationale for the review in the context of what is already known.                                                                                                                                                                                                                              | 3-5                |
| Objectives                         | 4  | Provide an explicit statement of questions being addressed with reference to participants, interventions, comparisons, outcomes, and study design (PICOS).                                                                                                                                                  | 5                  |
| <b>METHODS</b>                     |    |                                                                                                                                                                                                                                                                                                             |                    |
| Protocol and registration          | 5  | Indicate if a review protocol exists, if and where it can be accessed (e.g., Web address), and, if available, provide registration information including registration number.                                                                                                                               | -                  |
| Eligibility criteria               | 6  | Specify study characteristics (e.g., PICOS, length of follow-up) and report characteristics (e.g., years considered, language, publication status) used as criteria for eligibility, giving rationale.                                                                                                      | 5-7                |
| Information sources                | 7  | Describe all information sources (e.g., databases with dates of coverage, contact with study authors to identify additional studies) in the search and date last searched.                                                                                                                                  | 5-6                |
| Search                             | 8  | Present full electronic search strategy for at least one database, including any limits used, such that it could be repeated.                                                                                                                                                                               | 5-7                |
| Study selection                    | 9  | State the process for selecting studies (i.e., screening, eligibility, included in systematic review, and, if applicable, included in the meta-analysis).                                                                                                                                                   | 6-7                |
| Data collection process            | 10 | Describe method of data extraction from reports (e.g., piloted forms, independently, in duplicate) and any processes for obtaining and confirming data from investigators.                                                                                                                                  | 6-7                |
| Data items                         | 11 | List and define all variables for which data were sought (e.g., PICOS, funding sources) and any assumptions and simplifications made.                                                                                                                                                                       | 6                  |
| Risk of bias in individual studies | 12 | Describe methods used for assessing risk of bias of individual studies (including specification of whether this was done at the study or outcome level), and how this information is to be used in any data synthesis.                                                                                      | 6-7                |
| Summary measures                   | 13 | State the principal summary measures (e.g., risk ratio, difference in means).                                                                                                                                                                                                                               | 14-15              |
| Synthesis of results               | 14 | Describe the methods of handling data and combining results of studies, if done, including measures of consistency (e.g., $I^2$ ) for each meta-analysis.                                                                                                                                                   | No meta-analysis   |

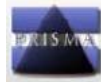

# PRISMA 2009 Checklist

Page 1 of 2

| Section/topic                 | #  | Checklist item                                                                                                                                                                                           | Reported on page # |
|-------------------------------|----|----------------------------------------------------------------------------------------------------------------------------------------------------------------------------------------------------------|--------------------|
| Risk of bias across studies   | 15 | Specify any assessment of risk of bias that may affect the cumulative evidence (e.g., publication bias, selective reporting within studies).                                                             | 5                  |
| Additional analyses           | 16 | Describe methods of additional analyses (e.g., sensitivity or subgroup analyses, meta-regression), if done, indicating which were pre-specified.                                                         | No meta-analysis   |
| <b>RESULTS</b>                |    |                                                                                                                                                                                                          |                    |
| Study selection               | 17 | Give numbers of studies screened, assessed for eligibility, and included in the review, with reasons for exclusions at each stage, ideally with a flow diagram.                                          | 6                  |
| Study characteristics         | 18 | For each study, present characteristics for which data were extracted (e.g., study size, PICOS, follow-up period) and provide the citations.                                                             | 10-13              |
| Risk of bias within studies   | 19 | Present data on risk of bias of each study and, if available, any outcome level assessment (see item 12).                                                                                                | 5                  |
| Results of individual studies | 20 | For all outcomes considered (benefits or harms), present, for each study: (a) simple summary data for each intervention group (b) effect estimates and confidence intervals, ideally with a forest plot. | 11-14              |
| Synthesis of results          | 21 | Present results of each meta-analysis done, including confidence intervals and measures of consistency.                                                                                                  | No meta-analysis   |
| Risk of bias across studies   | 22 | Present results of any assessment of risk of bias across studies (see Item 15).                                                                                                                          | 5                  |
| Additional analysis           | 23 | Give results of additional analyses, if done (e.g., sensitivity or subgroup analyses, meta-regression [see Item 16]).                                                                                    | -                  |
| <b>DISCUSSION</b>             |    |                                                                                                                                                                                                          |                    |
| Summary of evidence           | 24 | Summarize the main findings including the strength of evidence for each main outcome; consider their relevance to key groups (e.g., healthcare providers, users, and policy makers).                     | 15-18              |
| Limitations                   | 25 | Discuss limitations at study and outcome level (e.g., risk of bias), and at review-level (e.g., incomplete retrieval of identified research, reporting bias).                                            | 20                 |
| Conclusions                   | 26 | Provide a general interpretation of the results in the context of other evidence, and implications for future research.                                                                                  | 18-20              |
| <b>FUNDING</b>                |    |                                                                                                                                                                                                          |                    |
| Funding                       | 27 | Describe sources of funding for the systematic review and other support (e.g., supply of data); role of funders for the systematic review.                                                               | 22                 |

From: Moher D, Liberati A, Tetzlaff J, Altman DG, The PRISMA Group (2009). Preferred Reporting Items for Systematic Reviews and Meta-Analyses: The PRISMA Statement. PLoS Med 6(7): e1000097. doi:10.1371/journal.pmed1000097

For more information, visit: [www.prisma-statement.org](http://www.prisma-statement.org).

For peer review only - <http://bmjopen.bmj.com/site/about/guidelines.xhtml>
